# Supplementary material for: Porcine nasal septum cartilage-derived decellularized matrix promotes chondrogenic differentiation of human umbilical mesenchymal stem cells without exogenous growth factors
Source: Royal Society of Chemistry journal article supplement (doi:10.1039/d3tb03077f), 2024-01-01
Supplement: d3tb03077f2.xlsx [file d3tb03077f2.xlsx]

## Sheet: GO functional annotations
Protein ID	Symbol	GO_ID	GO term	DB:Reference	Evidence Code	Aspect	Taxon and Interacting taxon	Date
A0A8D1C673	A0A8D1C673	GO:0003755	peptidyl-prolyl cis-trans isomerase activity	GO_REF:0000104	IEA	molecular_function	taxon:9823	20230703
A0A8D1C673	A0A8D1C673	GO:0003755	peptidyl-prolyl cis-trans isomerase activity	GO_REF:0000043	IEA	molecular_function	taxon:9823	20230703
A0A8D1C673	A0A8D1C673	GO:0006457	protein folding	GO_REF:0000002	IEA	biological_process	taxon:9823	20230703
A0A8D1C673	A0A8D1C673	GO:0003755	peptidyl-prolyl cis-trans isomerase activity	GO_REF:0000002	IEA	molecular_function	taxon:9823	20230703
A0A8D1C673	A0A8D1C673	GO:0016853	isomerase activity	GO_REF:0000043	IEA	molecular_function	taxon:9823	20230703
A0A4X1SF84	LOC100154044	GO:0003723	RNA binding	GO_REF:0000104	IEA	molecular_function	taxon:9823	20230703
A0A4X1SF84	LOC100154044	GO:0003676	nucleic acid binding	GO_REF:0000002	IEA	molecular_function	taxon:9823	20230703
A0A4X1SF84	LOC100154044	GO:0003723	RNA binding	GO_REF:0000043	IEA	molecular_function	taxon:9823	20230703
A0A4X1SF84	LOC100154044	GO:0003723	RNA binding	GO_REF:0000002	IEA	molecular_function	taxon:9823	20230703
A0A4X1TUU3	PDCD5	GO:0003677	DNA binding	GO_REF:0000002	IEA	molecular_function	taxon:9823	20230703
A0A5G2R844	CENPV	GO:0046872	metal ion binding	GO_REF:0000043	IEA	molecular_function	taxon:9823	20230703
A0A5G2R844	CENPV	GO:0016846	carbon-sulfur lyase activity	GO_REF:0000002	IEA	molecular_function	taxon:9823	20230703
A0A4X1V1B8	ME1	GO:0006108	malate metabolic process	GO_REF:0000107	IEA	biological_process	taxon:9823	20230703
A0A4X1V1B8	ME1	GO:0030145	manganese ion binding	GO_REF:0000107	IEA	molecular_function	taxon:9823	20230703
A0A4X1V1B8	ME1	GO:0006734	NADH metabolic process	GO_REF:0000107	IEA	biological_process	taxon:9823	20230703
A0A4X1V1B8	ME1	GO:0000287	magnesium ion binding	GO_REF:0000107	IEA	molecular_function	taxon:9823	20230703
A0A4X1V1B8	ME1	GO:0051289	protein homotetramerization	GO_REF:0000107	IEA	biological_process	taxon:9823	20230703
A0A4X1V1B8	ME1	GO:0046872	metal ion binding	GO_REF:0000043	IEA	molecular_function	taxon:9823	20230703
A0A4X1V1B8	ME1	GO:0051287	NAD binding	GO_REF:0000002	IEA	molecular_function	taxon:9823	20230703
A0A4X1V1B8	ME1	GO:0042802	identical protein binding	GO_REF:0000107	IEA	molecular_function	taxon:9823	20230703
A0A4X1V1B8	ME1	GO:0004470	malic enzyme activity	GO_REF:0000107	IEA	molecular_function	taxon:9823	20230703
A0A4X1V1B8	ME1	GO:0004471	malate dehydrogenase (decarboxylating) (NAD+) activity	GO_REF:0000002	IEA	molecular_function	taxon:9823	20230703
A0A4X1V1B8	ME1	GO:0004470	malic enzyme activity	GO_REF:0000117	IEA	molecular_function	taxon:9823	20230703
A0A4X1V1B8	ME1	GO:0004470	malic enzyme activity	GO_REF:0000002	IEA	molecular_function	taxon:9823	20230703
A0A4X1V1B8	ME1	GO:0016491	oxidoreductase activity	GO_REF:0000043	IEA	molecular_function	taxon:9823	20230703
A0A4X1V1B8	ME1	GO:0006739	NADP metabolic process	GO_REF:0000107	IEA	biological_process	taxon:9823	20230703
A0A4X1V1B8	ME1	GO:0005737	cytoplasm	GO_REF:0000107	IEA	cellular_component	taxon:9823	20230703
A0A4X1V1B8	ME1	GO:0016616	oxidoreductase activity, acting on the CH-OH group of donors, NAD or NADP as acceptor	GO_REF:0000117	IEA	molecular_function	taxon:9823	20230703
A0A4X1V1B8	ME1	GO:1902031	regulation of NADP metabolic process	GO_REF:0000107	IEA	biological_process	taxon:9823	20230703
A0A4X1V1B8	ME1	GO:0008948	oxaloacetate decarboxylase activity	GO_REF:0000107	IEA	molecular_function	taxon:9823	20230703
A0A4X1V1B8	ME1	GO:0004473	malate dehydrogenase (decarboxylating) (NADP+) activity	GO_REF:0000107	IEA	molecular_function	taxon:9823	20230703
A0A4X1TBI0	CALR	GO:0005509	calcium ion binding	GO_REF:0000002	IEA	molecular_function	taxon:9823	20230703
A0A4X1TBI0	CALR	GO:0005788	endoplasmic reticulum lumen	GO_REF:0000104	IEA	cellular_component	taxon:9823	20230703
A0A4X1TBI0	CALR	GO:0005783	endoplasmic reticulum	GO_REF:0000002	IEA	cellular_component	taxon:9823	20230703
A0A4X1TBI0	CALR	GO:0006457	protein folding	GO_REF:0000002	IEA	biological_process	taxon:9823	20230703
A0A4X1TBI0	CALR	GO:0005788	endoplasmic reticulum lumen	GO_REF:0000044	IEA	cellular_component	taxon:9823	20230703
A0A4X1TBI0	CALR	GO:0005783	endoplasmic reticulum	GO_REF:0000043	IEA	cellular_component	taxon:9823	20230703
A0A4X1TBI0	CALR	GO:0051082	unfolded protein binding	GO_REF:0000002	IEA	molecular_function	taxon:9823	20230703
F2Z5V4	PAFAH1B2	GO:0016042	lipid catabolic process	GO_REF:0000043	IEA	biological_process	taxon:9823	20230703
A0A8D0ITB4	A0A8D0ITB4	GO:0005536	glucose binding	GO_REF:0000002	IEA	molecular_function	taxon:9823	20230703
A0A8D0ITB4	A0A8D0ITB4	GO:0016020	membrane	GO_REF:0000044	IEA	cellular_component	taxon:9823	20230703
A0A8D0ITB4	A0A8D0ITB4	GO:0005975	carbohydrate metabolic process	GO_REF:0000002	IEA	biological_process	taxon:9823	20230703
A0A8D0ITB4	A0A8D0ITB4	GO:0005524	ATP binding	GO_REF:0000002	IEA	molecular_function	taxon:9823	20230703
A0A8D0ITB4	A0A8D0ITB4	GO:0006096	glycolytic process	GO_REF:0000041	IEA	biological_process	taxon:9823	20230703
A0A8D0ITB4	A0A8D0ITB4	GO:0005829	cytosol	GO_REF:0000044	IEA	cellular_component	taxon:9823	20230703
A0A8D0ITB4	A0A8D0ITB4	GO:0016301	kinase activity	GO_REF:0000043	IEA	molecular_function	taxon:9823	20230703
A0A8D0ITB4	A0A8D0ITB4	GO:0046835	carbohydrate phosphorylation	GO_REF:0000108	IEA	biological_process	taxon:9823	20230705
A0A8D0ITB4	A0A8D0ITB4	GO:0005741	mitochondrial outer membrane	GO_REF:0000044	IEA	cellular_component	taxon:9823	20230703
A0A8D0ITB4	A0A8D0ITB4	GO:0008152	metabolic process	GO_REF:0000043	IEA	biological_process	taxon:9823	20230703
A0A8D0ITB4	A0A8D0ITB4	GO:0019318	hexose metabolic process	GO_REF:0000041	IEA	biological_process	taxon:9823	20230703
A0A8D0ITB4	A0A8D0ITB4	GO:0006096	glycolytic process	GO_REF:0000002	IEA	biological_process	taxon:9823	20230703
A0A8D0ITB4	A0A8D0ITB4	GO:0001678	intracellular glucose homeostasis	GO_REF:0000002	IEA	biological_process	taxon:9823	20230703
A0A8D0ITB4	A0A8D0ITB4	GO:0000166	nucleotide binding	GO_REF:0000043	IEA	molecular_function	taxon:9823	20230703
A0A8D0ITB4	A0A8D0ITB4	GO:0005524	ATP binding	GO_REF:0000043	IEA	molecular_function	taxon:9823	20230703
A0A8D0ITB4	A0A8D0ITB4	GO:0006096	glycolytic process	GO_REF:0000043	IEA	biological_process	taxon:9823	20230703
A0A8D0ITB4	A0A8D0ITB4	GO:0016773	phosphotransferase activity, alcohol group as acceptor	GO_REF:0000002	IEA	molecular_function	taxon:9823	20230703
A0A8D0ITB4	A0A8D0ITB4	GO:0004396	hexokinase activity	GO_REF:0000002	IEA	molecular_function	taxon:9823	20230703
A0A8D0ITB4	A0A8D0ITB4	GO:0003824	catalytic activity	GO_REF:0000043	IEA	molecular_function	taxon:9823	20230703
A0A8D0ITB4	A0A8D0ITB4	GO:0016310	phosphorylation	GO_REF:0000043	IEA	biological_process	taxon:9823	20230703
A0A8D0ITB4	A0A8D0ITB4	GO:0016740	transferase activity	GO_REF:0000043	IEA	molecular_function	taxon:9823	20230703
A0A8D0HTV3	A0A8D0HTV3	GO:0005737	cytoplasm	GO_REF:0000044	IEA	cellular_component	taxon:9823	20230703
A0A8D0HTV3	A0A8D0HTV3	GO:0005737	cytoplasm	GO_REF:0000043	IEA	cellular_component	taxon:9823	20230703
A0A8D0HTV3	A0A8D0HTV3	GO:0004869	cysteine-type endopeptidase inhibitor activity	GO_REF:0000002	IEA	molecular_function	taxon:9823	20230703
A0A8D0HTV3	A0A8D0HTV3	GO:0030414	peptidase inhibitor activity	GO_REF:0000043	IEA	molecular_function	taxon:9823	20230703
A0A8D0HTV3	A0A8D0HTV3	GO:0004869	cysteine-type endopeptidase inhibitor activity	GO_REF:0000043	IEA	molecular_function	taxon:9823	20230703
A0A8D0HTV3	A0A8D0HTV3	GO:0004866	endopeptidase inhibitor activity	GO_REF:0000002	IEA	molecular_function	taxon:9823	20230703
A0A8D0TRX0	LOC110260088	GO:0016282	eukaryotic 43S preinitiation complex	GO_REF:0000104	IEA	cellular_component	taxon:9823	20230703
A0A8D0TRX0	LOC110260088	GO:0005852	eukaryotic translation initiation factor 3 complex	GO_REF:0000002	IEA	cellular_component	taxon:9823	20230703
A0A8D0TRX0	LOC110260088	GO:0005852	eukaryotic translation initiation factor 3 complex	GO_REF:0000104	IEA	cellular_component	taxon:9823	20230703
A0A8D0TRX0	LOC110260088	GO:0002183	cytoplasmic translational initiation	GO_REF:0000104	IEA	biological_process	taxon:9823	20230703
A0A8D0TRX0	LOC110260088	GO:0031369	translation initiation factor binding	GO_REF:0000002	IEA	molecular_function	taxon:9823	20230703
A0A8D0TRX0	LOC110260088	GO:0006413	translational initiation	GO_REF:0000002	IEA	biological_process	taxon:9823	20230703
A0A8D0TRX0	LOC110260088	GO:0003743	translation initiation factor activity	GO_REF:0000043	IEA	molecular_function	taxon:9823	20230703
A0A8D0TRX0	LOC110260088	GO:0006413	translational initiation	GO_REF:0000043	IEA	biological_process	taxon:9823	20230703
A0A8D0TRX0	LOC110260088	GO:0005737	cytoplasm	GO_REF:0000044	IEA	cellular_component	taxon:9823	20230703
A0A8D0TRX0	LOC110260088	GO:0005737	cytoplasm	GO_REF:0000043	IEA	cellular_component	taxon:9823	20230703
A0A8D0TRX0	LOC110260088	GO:0003743	translation initiation factor activity	GO_REF:0000002	IEA	molecular_function	taxon:9823	20230703
A0A8D0TRX0	LOC110260088	GO:0003743	translation initiation factor activity	GO_REF:0000104	IEA	molecular_function	taxon:9823	20230703
A0A8D0TRX0	LOC110260088	GO:0001732	formation of cytoplasmic translation initiation complex	GO_REF:0000104	IEA	biological_process	taxon:9823	20230703
A0A8D0TRX0	LOC110260088	GO:0003723	RNA binding	GO_REF:0000002	IEA	molecular_function	taxon:9823	20230703
A0A8D0TRX0	LOC110260088	GO:0033290	eukaryotic 48S preinitiation complex	GO_REF:0000104	IEA	cellular_component	taxon:9823	20230703
A0A8D0TRX0	LOC110260088	GO:0006412	translation	GO_REF:0000043	IEA	biological_process	taxon:9823	20230703
A0A8D0TRX0	LOC110260088	GO:0005737	cytoplasm	GO_REF:0000104	IEA	cellular_component	taxon:9823	20230703
A0A8D0TRX0	LOC110260088	GO:0005634	nucleus	GO_REF:0000043	IEA	cellular_component	taxon:9823	20230703
A0A8D1IS48	A0A8D1IS48	GO:0046872	metal ion binding	GO_REF:0000043	IEA	molecular_function	taxon:9823	20230703
A0A8D1IS48	A0A8D1IS48	GO:0005509	calcium ion binding	GO_REF:0000002	IEA	molecular_function	taxon:9823	20230703
A0A5G2QYC4	GNAS	GO:0007165	signal transduction	GO_REF:0000002	IEA	biological_process	taxon:9823	20230703
A0A5G2QYC4	GNAS	GO:0007165	signal transduction	GO_REF:0000043	IEA	biological_process	taxon:9823	20230703
A0A5G2QYC4	GNAS	GO:0019001	guanyl nucleotide binding	GO_REF:0000002	IEA	molecular_function	taxon:9823	20230703
A0A5G2QYC4	GNAS	GO:0050896	response to stimulus	GO_REF:0000117	IEA	biological_process	taxon:9823	20230703
A0A5G2QYC4	GNAS	GO:0016020	membrane	GO_REF:0000117	IEA	cellular_component	taxon:9823	20230703
A0A5G2QYC4	GNAS	GO:0005525	GTP binding	GO_REF:0000002	IEA	molecular_function	taxon:9823	20230703
A0A5G2QYC4	GNAS	GO:0031683	G-protein beta/gamma-subunit complex binding	GO_REF:0000002	IEA	molecular_function	taxon:9823	20230703
A0A5G2QYC4	GNAS	GO:0000166	nucleotide binding	GO_REF:0000043	IEA	molecular_function	taxon:9823	20230703
A0A5G2QYC4	GNAS	GO:0046872	metal ion binding	GO_REF:0000043	IEA	molecular_function	taxon:9823	20230703
A0A5G2QYC4	GNAS	GO:0003924	GTPase activity	GO_REF:0000002	IEA	molecular_function	taxon:9823	20230703
A0A5G2QYC4	GNAS	GO:0007186	G protein-coupled receptor signaling pathway	GO_REF:0000002	IEA	biological_process	taxon:9823	20230703
A0A5G2QYC4	GNAS	GO:0005525	GTP binding	GO_REF:0000043	IEA	molecular_function	taxon:9823	20230703
A0A8D1P3L9	A0A8D1P3L9	GO:0005975	carbohydrate metabolic process	GO_REF:0000043	IEA	biological_process	taxon:9823	20230703
A0A8D1P3L9	A0A8D1P3L9	GO:0003939	L-iditol 2-dehydrogenase activity	GO_REF:0000104	IEA	molecular_function	taxon:9823	20230703
A0A8D1P3L9	A0A8D1P3L9	GO:0031966	mitochondrial membrane	GO_REF:0000044	IEA	cellular_component	taxon:9823	20230703
A0A8D1P3L9	A0A8D1P3L9	GO:0008270	zinc ion binding	GO_REF:0000104	IEA	molecular_function	taxon:9823	20230703
A0A8D1P3L9	A0A8D1P3L9	GO:0016491	oxidoreductase activity	GO_REF:0000002	IEA	molecular_function	taxon:9823	20230703
A0A8D1P3L9	A0A8D1P3L9	GO:0031514	motile cilium	GO_REF:0000044	IEA	cellular_component	taxon:9823	20230703
A0A8D1P3L9	A0A8D1P3L9	GO:0008270	zinc ion binding	GO_REF:0000002	IEA	molecular_function	taxon:9823	20230703
A0A8D1P3L9	A0A8D1P3L9	GO:0006062	sorbitol catabolic process	GO_REF:0000104	IEA	biological_process	taxon:9823	20230703
A0A8D1P3L9	A0A8D1P3L9	GO:0016491	oxidoreductase activity	GO_REF:0000043	IEA	molecular_function	taxon:9823	20230703
A0A8D1P3L9	A0A8D1P3L9	GO:0046872	metal ion binding	GO_REF:0000043	IEA	molecular_function	taxon:9823	20230703
A0A8D1P3L9	A0A8D1P3L9	GO:0016616	oxidoreductase activity, acting on the CH-OH group of donors, NAD or NADP as acceptor	GO_REF:0000002	IEA	molecular_function	taxon:9823	20230703
I3LVS7	RHOA	GO:0030334	regulation of cell migration	GO_REF:0000107	IEA	biological_process	taxon:9823	20230703
I3LVS7	RHOA	GO:0021861	forebrain radial glial cell differentiation	GO_REF:0000024	ISS	biological_process	taxon:9823	20150916
I3LVS7	RHOA	GO:0071944	cell periphery	GO_REF:0000107	IEA	cellular_component	taxon:9823	20230703
I3LVS7	RHOA	GO:0045198	establishment of epithelial cell apical/basal polarity	GO_REF:0000107	IEA	biological_process	taxon:9823	20230703
I3LVS7	RHOA	GO:0003189	aortic valve formation	GO_REF:0000107	IEA	biological_process	taxon:9823	20230703
I3LVS7	RHOA	GO:0033144	negative regulation of intracellular steroid hormone receptor signaling pathway	GO_REF:0000107	IEA	biological_process	taxon:9823	20230703
I3LVS7	RHOA	GO:0051496	positive regulation of stress fiber assembly	GO_REF:0000107	IEA	biological_process	taxon:9823	20230703
I3LVS7	RHOA	GO:0070507	regulation of microtubule cytoskeleton organization	GO_REF:0000107	IEA	biological_process	taxon:9823	20230703
I3LVS7	RHOA	GO:0005525	GTP binding	PMID:21873635	IBA	molecular_function	taxon:9823	20200809
I3LVS7	RHOA	GO:0005938	cell cortex	GO_REF:0000107	IEA	cellular_component	taxon:9823	20230703
I3LVS7	RHOA	GO:0043124	negative regulation of I-kappaB kinase/NF-kappaB signaling	GO_REF:0000024	ISS	biological_process	taxon:9823	20150916
I3LVS7	RHOA	GO:0043296	apical junction complex	GO_REF:0000024	ISS	cellular_component	taxon:9823	20150916
I3LVS7	RHOA	GO:0042476	odontogenesis	GO_REF:0000107	IEA	biological_process	taxon:9823	20230703
I3LVS7	RHOA	GO:0000902	cell morphogenesis	GO_REF:0000024	ISS	biological_process	taxon:9823	20150916
I3LVS7	RHOA	GO:0002363	alpha-beta T cell lineage commitment	GO_REF:0000024	ISS	biological_process	taxon:9823	20150916
I3LVS7	RHOA	GO:0031982	vesicle	GO_REF:0000107	IEA	cellular_component	taxon:9823	20230703
I3LVS7	RHOA	GO:0045665	negative regulation of neuron differentiation	GO_REF:0000024	ISS	biological_process	taxon:9823	20150916
I3LVS7	RHOA	GO:2000177	regulation of neural precursor cell proliferation	GO_REF:0000107	IEA	biological_process	taxon:9823	20230703
I3LVS7	RHOA	GO:0003924	GTPase activity	PMID:21873635	IBA	molecular_function	taxon:9823	20211112
I3LVS7	RHOA	GO:0006357	regulation of transcription by RNA polymerase II	GO_REF:0000107	IEA	biological_process	taxon:9823	20230703
I3LVS7	RHOA	GO:0003924	GTPase activity	GO_REF:0000107	IEA	molecular_function	taxon:9823	20230703
I3LVS7	RHOA	GO:0032587	ruffle membrane	GO_REF:0000107	IEA	cellular_component	taxon:9823	20230703
I3LVS7	RHOA	GO:1905274	regulation of modification of postsynaptic actin cytoskeleton	GO_REF:0000107	IEA	biological_process	taxon:9823	20230703
I3LVS7	RHOA	GO:1903427	negative regulation of reactive oxygen species biosynthetic process	GO_REF:0000024	ISS	biological_process	taxon:9823	20150916
I3LVS7	RHOA	GO:0005525	GTP binding	GO_REF:0000024	ISS	molecular_function	taxon:9823	20150916
I3LVS7	RHOA	GO:0099159	regulation of modification of postsynaptic structure	GO_REF:0000107	IEA	biological_process	taxon:9823	20230703
I3LVS7	RHOA	GO:0043297	apical junction assembly	GO_REF:0000024	ISS	biological_process	taxon:9823	20150916
I3LVS7	RHOA	GO:0072687	meiotic spindle	PMID:25485583	IDA	cellular_component	taxon:9823	20150902
I3LVS7	RHOA	GO:0090307	mitotic spindle assembly	GO_REF:0000024	ISS	biological_process	taxon:9823	20150916
I3LVS7	RHOA	GO:0050919	negative chemotaxis	GO_REF:0000024	ISS	biological_process	taxon:9823	20150916
I3LVS7	RHOA	GO:0043280	positive regulation of cysteine-type endopeptidase activity involved in apoptotic process	GO_REF:0000024	ISS	biological_process	taxon:9823	20150916
I3LVS7	RHOA	GO:0002363	alpha-beta T cell lineage commitment	GO_REF:0000107	IEA	biological_process	taxon:9823	20230703
I3LVS7	RHOA	GO:0007155	cell adhesion	GO_REF:0000107	IEA	biological_process	taxon:9823	20230703
I3LVS7	RHOA	GO:0071345	cellular response to cytokine stimulus	GO_REF:0000107	IEA	biological_process	taxon:9823	20230703
I3LVS7	RHOA	GO:0098978	glutamatergic synapse	GO_REF:0000107	IEA	cellular_component	taxon:9823	20230703
I3LVS7	RHOA	GO:0032467	positive regulation of cytokinesis	GO_REF:0000107	IEA	biological_process	taxon:9823	20230703
I3LVS7	RHOA	GO:0007519	skeletal muscle tissue development	GO_REF:0000024	ISS	biological_process	taxon:9823	20150916
I3LVS7	RHOA	GO:0043366	beta selection	GO_REF:0000024	ISS	biological_process	taxon:9823	20150916
I3LVS7	RHOA	GO:0005737	cytoplasm	GO_REF:0000024	ISS	cellular_component	taxon:9823	20150916
I3LVS7	RHOA	GO:0001998	angiotensin-mediated vasoconstriction involved in regulation of systemic arterial blood pressure	GO_REF:0000107	IEA	biological_process	taxon:9823	20230703
I3LVS7	RHOA	GO:0001764	neuron migration	GO_REF:0000107	IEA	biological_process	taxon:9823	20230703
I3LVS7	RHOA	GO:0032956	regulation of actin cytoskeleton organization	GO_REF:0000024	ISS	biological_process	taxon:9823	20150916
I3LVS7	RHOA	GO:0005829	cytosol	PMID:21873635	IBA	cellular_component	taxon:9823	20230330
I3LVS7	RHOA	GO:0030521	androgen receptor signaling pathway	GO_REF:0000107	IEA	biological_process	taxon:9823	20230703
I3LVS7	RHOA	GO:0070507	regulation of microtubule cytoskeleton organization	GO_REF:0000024	ISS	biological_process	taxon:9823	20150916
I3LVS7	RHOA	GO:1901224	positive regulation of NIK/NF-kappaB signaling	GO_REF:0000107	IEA	biological_process	taxon:9823	20230703
I3LVS7	RHOA	GO:1990869	cellular response to chemokine	GO_REF:0000107	IEA	biological_process	taxon:9823	20230703
I3LVS7	RHOA	GO:0040038	polar body extrusion after meiotic divisions	PMID:25485583	IMP	biological_process	taxon:9823	20150902
I3LVS7	RHOA	GO:1904996	positive regulation of leukocyte adhesion to vascular endothelial cell	GO_REF:0000107	IEA	biological_process	taxon:9823	20230703
I3LVS7	RHOA	GO:0038027	apolipoprotein A-I-mediated signaling pathway	GO_REF:0000107	IEA	biological_process	taxon:9823	20230703
I3LVS7	RHOA	GO:0009898	cytoplasmic side of plasma membrane	GO_REF:0000107	IEA	cellular_component	taxon:9823	20230703
I3LVS7	RHOA	GO:0031122	cytoplasmic microtubule organization	GO_REF:0000107	IEA	biological_process	taxon:9823	20230703
I3LVS7	RHOA	GO:0007266	Rho protein signal transduction	PMID:21873635	IBA	biological_process	taxon:9823	20230320
I3LVS7	RHOA	GO:0070062	extracellular exosome	GO_REF:0000024	ISS	cellular_component	taxon:9823	20150916
I3LVS7	RHOA	GO:0090307	mitotic spindle assembly	GO_REF:0000107	IEA	biological_process	taxon:9823	20230703
I3LVS7	RHOA	GO:0007160	cell-matrix adhesion	GO_REF:0000107	IEA	biological_process	taxon:9823	20230703
I3LVS7	RHOA	GO:1903673	mitotic cleavage furrow formation	GO_REF:0000107	IEA	biological_process	taxon:9823	20230703
I3LVS7	RHOA	GO:0017022	myosin binding	GO_REF:0000024	ISS	molecular_function	taxon:9823	20150916
I3LVS7	RHOA	GO:0030027	lamellipodium	GO_REF:0000024	ISS	cellular_component	taxon:9823	20150916
I3LVS7	RHOA	GO:0051496	positive regulation of stress fiber assembly	GO_REF:0000024	ISS	biological_process	taxon:9823	20150916
I3LVS7	RHOA	GO:0030154	cell differentiation	GO_REF:0000107	IEA	biological_process	taxon:9823	20230703
I3LVS7	RHOA	GO:0000212	meiotic spindle organization	PMID:25485583	IMP	biological_process	taxon:9823	20150903
I3LVS7	RHOA	GO:0043149	stress fiber assembly	GO_REF:0000024	ISS	biological_process	taxon:9823	20150916
I3LVS7	RHOA	GO:0031098	stress-activated protein kinase signaling cascade	GO_REF:0000024	ISS	biological_process	taxon:9823	20150916
I3LVS7	RHOA	GO:0090324	negative regulation of oxidative phosphorylation	GO_REF:0000024	ISS	biological_process	taxon:9823	20150916
I3LVS7	RHOA	GO:0043149	stress fiber assembly	GO_REF:0000107	IEA	biological_process	taxon:9823	20230703
I3LVS7	RHOA	GO:0030838	positive regulation of actin filament polymerization	GO_REF:0000024	ISS	biological_process	taxon:9823	20150916
I3LVS7	RHOA	GO:0032154	cleavage furrow	PMID:25485583	IDA	cellular_component	taxon:9823	20150903
I3LVS7	RHOA	GO:0005634	nucleus	GO_REF:0000107	IEA	cellular_component	taxon:9823	20230703
I3LVS7	RHOA	GO:0007264	small GTPase mediated signal transduction	GO_REF:0000002	IEA	biological_process	taxon:9823	20230703
I3LVS7	RHOA	GO:0021795	cerebral cortex cell migration	GO_REF:0000024	ISS	biological_process	taxon:9823	20150916
I3LVS7	RHOA	GO:0007010	cytoskeleton organization	GO_REF:0000107	IEA	biological_process	taxon:9823	20230703
I3LVS7	RHOA	GO:0019904	protein domain specific binding	GO_REF:0000024	ISS	molecular_function	taxon:9823	20150916
I3LVS7	RHOA	GO:0045987	positive regulation of smooth muscle contraction	GO_REF:0000024	ISS	biological_process	taxon:9823	20150916
I3LVS7	RHOA	GO:0016020	membrane	GO_REF:0000024	ISS	cellular_component	taxon:9823	20150916
I3LVS7	RHOA	GO:0030950	establishment or maintenance of actin cytoskeleton polarity	PMID:25485583	IMP	biological_process	taxon:9823	20150903
I3LVS7	RHOA	GO:0009410	response to xenobiotic stimulus	GO_REF:0000024	ISS	biological_process	taxon:9823	20150916
I3LVS7	RHOA	GO:0007266	Rho protein signal transduction	GO_REF:0000107	IEA	biological_process	taxon:9823	20230703
I3LVS7	RHOA	GO:0032154	cleavage furrow	PMID:21873635	IBA	cellular_component	taxon:9823	20200327
I3LVS7	RHOA	GO:0061383	trabecula morphogenesis	GO_REF:0000024	ISS	biological_process	taxon:9823	20150916
I3LVS7	RHOA	GO:0032587	ruffle membrane	GO_REF:0000024	ISS	cellular_component	taxon:9823	20150916
I3LVS7	RHOA	GO:0097498	endothelial tube lumen extension	GO_REF:0000107	IEA	biological_process	taxon:9823	20230703
I3LVS7	RHOA	GO:0010975	regulation of neuron projection development	GO_REF:0000107	IEA	biological_process	taxon:9823	20230703
I3LVS7	RHOA	GO:0071803	positive regulation of podosome assembly	GO_REF:0000107	IEA	biological_process	taxon:9823	20230703
I3LVS7	RHOA	GO:0071803	positive regulation of podosome assembly	GO_REF:0000024	ISS	biological_process	taxon:9823	20150916
I3LVS7	RHOA	GO:0046638	positive regulation of alpha-beta T cell differentiation	GO_REF:0000107	IEA	biological_process	taxon:9823	20230703
I3LVS7	RHOA	GO:0060193	positive regulation of lipase activity	GO_REF:0000024	ISS	biological_process	taxon:9823	20150916
I3LVS7	RHOA	GO:0030027	lamellipodium	GO_REF:0000107	IEA	cellular_component	taxon:9823	20230703
I3LVS7	RHOA	GO:0043123	positive regulation of I-kappaB kinase/NF-kappaB signaling	GO_REF:0000107	IEA	biological_process	taxon:9823	20230703
I3LVS7	RHOA	GO:0034329	cell junction assembly	GO_REF:0000107	IEA	biological_process	taxon:9823	20230703
I3LVS7	RHOA	GO:0045792	negative regulation of cell size	GO_REF:0000107	IEA	biological_process	taxon:9823	20230703
I3LVS7	RHOA	GO:0019003	GDP binding	GO_REF:0000024	ISS	molecular_function	taxon:9823	20150916
I3LVS7	RHOA	GO:0005739	mitochondrion	GO_REF:0000024	ISS	cellular_component	taxon:9823	20150916
I3LVS7	RHOA	GO:0030307	positive regulation of cell growth	GO_REF:0000024	ISS	biological_process	taxon:9823	20150916
I3LVS7	RHOA	GO:0016477	cell migration	GO_REF:0000107	IEA	biological_process	taxon:9823	20230703
I3LVS7	RHOA	GO:0043524	negative regulation of neuron apoptotic process	GO_REF:0000024	ISS	biological_process	taxon:9823	20150916
I3LVS7	RHOA	GO:2000406	positive regulation of T cell migration	GO_REF:0000107	IEA	biological_process	taxon:9823	20230703
I3LVS7	RHOA	GO:0005886	plasma membrane	GO_REF:0000107	IEA	cellular_component	taxon:9823	20230703
I3LVS7	RHOA	GO:0046638	positive regulation of alpha-beta T cell differentiation	GO_REF:0000024	ISS	biological_process	taxon:9823	20150916
I3LVS7	RHOA	GO:0005768	endosome	GO_REF:0000107	IEA	cellular_component	taxon:9823	20230703
I3LVS7	RHOA	GO:0030521	androgen receptor signaling pathway	GO_REF:0000024	ISS	biological_process	taxon:9823	20150916
I3LVS7	RHOA	GO:2000672	negative regulation of motor neuron apoptotic process	GO_REF:0000107	IEA	biological_process	taxon:9823	20230703
I3LVS7	RHOA	GO:0043525	positive regulation of neuron apoptotic process	GO_REF:0000024	ISS	biological_process	taxon:9823	20150916
I3LVS7	RHOA	GO:0038027	apolipoprotein A-I-mediated signaling pathway	GO_REF:0000024	ISS	biological_process	taxon:9823	20150916
I3LVS7	RHOA	GO:0000902	cell morphogenesis	GO_REF:0000107	IEA	biological_process	taxon:9823	20230703
I3LVS7	RHOA	GO:0005768	endosome	GO_REF:0000024	ISS	cellular_component	taxon:9823	20150916
I3LVS7	RHOA	GO:0030036	actin cytoskeleton organization	GO_REF:0000107	IEA	biological_process	taxon:9823	20230703
I3LVS7	RHOA	GO:0005938	cell cortex	PMID:25485583	IDA	cellular_component	taxon:9823	20150902
I3LVS7	RHOA	GO:0005634	nucleus	GO_REF:0000024	ISS	cellular_component	taxon:9823	20150916
I3LVS7	RHOA	GO:1904695	positive regulation of vascular associated smooth muscle contraction	GO_REF:0000107	IEA	biological_process	taxon:9823	20230703
I3LVS7	RHOA	GO:0045666	positive regulation of neuron differentiation	GO_REF:0000024	ISS	biological_process	taxon:9823	20150916
I3LVS7	RHOA	GO:0030424	axon	GO_REF:0000024	ISS	cellular_component	taxon:9823	20150916
I3LVS7	RHOA	GO:0051653	spindle localization	PMID:25485583	IMP	biological_process	taxon:9823	20150903
I3LVS7	RHOA	GO:0030036	actin cytoskeleton organization	GO_REF:0000024	ISS	biological_process	taxon:9823	20150916
I3LVS7	RHOA	GO:0010975	regulation of neuron projection development	GO_REF:0000024	ISS	biological_process	taxon:9823	20150916
I3LVS7	RHOA	GO:0043931	ossification involved in bone maturation	GO_REF:0000024	ISS	biological_process	taxon:9823	20150916
I3LVS7	RHOA	GO:0006357	regulation of transcription by RNA polymerase II	GO_REF:0000024	ISS	biological_process	taxon:9823	20150916
I3LVS7	RHOA	GO:0031982	vesicle	GO_REF:0000024	ISS	cellular_component	taxon:9823	20160322
I3LVS7	RHOA	GO:0030334	regulation of cell migration	GO_REF:0000024	ISS	biological_process	taxon:9823	20150916
I3LVS7	RHOA	GO:0097049	motor neuron apoptotic process	GO_REF:0000107	IEA	biological_process	taxon:9823	20230703
I3LVS7	RHOA	GO:0010812	negative regulation of cell-substrate adhesion	GO_REF:0000107	IEA	biological_process	taxon:9823	20230703
I3LVS7	RHOA	GO:0090324	negative regulation of oxidative phosphorylation	GO_REF:0000107	IEA	biological_process	taxon:9823	20230703
I3LVS7	RHOA	GO:0033144	negative regulation of intracellular steroid hormone receptor signaling pathway	GO_REF:0000024	ISS	biological_process	taxon:9823	20150916
I3LVS7	RHOA	GO:0043296	apical junction complex	GO_REF:0000107	IEA	cellular_component	taxon:9823	20230703
I3LVS7	RHOA	GO:0043366	beta selection	GO_REF:0000107	IEA	biological_process	taxon:9823	20230703
I3LVS7	RHOA	GO:0005829	cytosol	GO_REF:0000024	ISS	cellular_component	taxon:9823	20150916
I3LVS7	RHOA	GO:0030154	cell differentiation	GO_REF:0000024	ISS	biological_process	taxon:9823	20150916
I3LVS7	RHOA	GO:0005829	cytosol	GO_REF:0000107	IEA	cellular_component	taxon:9823	20230703
I3LVS7	RHOA	GO:0040016	embryonic cleavage	PMID:25485583	IMP	biological_process	taxon:9823	20150903
I3LVS7	RHOA	GO:0071944	cell periphery	GO_REF:0000024	ISS	cellular_component	taxon:9823	20150916
I3LVS7	RHOA	GO:0021861	forebrain radial glial cell differentiation	GO_REF:0000107	IEA	biological_process	taxon:9823	20230703
I3LVS7	RHOA	GO:0043197	dendritic spine	PMID:21873635	IBA	cellular_component	taxon:9823	20230603
I3LVS7	RHOA	GO:2000177	regulation of neural precursor cell proliferation	GO_REF:0000024	ISS	biological_process	taxon:9823	20150916
I3LVS7	RHOA	GO:0007160	cell-matrix adhesion	GO_REF:0000024	ISS	biological_process	taxon:9823	20150916
I3LVS7	RHOA	GO:0036089	cleavage furrow formation	GO_REF:0000107	IEA	biological_process	taxon:9823	20230703
I3LVS7	RHOA	GO:0032956	regulation of actin cytoskeleton organization	GO_REF:0000107	IEA	biological_process	taxon:9823	20230703
I3LVS7	RHOA	GO:0000166	nucleotide binding	GO_REF:0000043	IEA	molecular_function	taxon:9823	20230703
I3LVS7	RHOA	GO:0001822	kidney development	GO_REF:0000107	IEA	biological_process	taxon:9823	20230703
I3LVS7	RHOA	GO:0046039	GTP metabolic process	GO_REF:0000024	ISS	biological_process	taxon:9823	20150916
I3LVS7	RHOA	GO:0043149	stress fiber assembly	PMID:21873635	IBA	biological_process	taxon:9823	20200327
I3LVS7	RHOA	GO:0016477	cell migration	PMID:21873635	IBA	biological_process	taxon:9823	20220924
I3LVS7	RHOA	GO:0005886	plasma membrane	GO_REF:0000024	ISS	cellular_component	taxon:9823	20150916
I3LVS7	RHOA	GO:0003924	GTPase activity	GO_REF:0000024	ISS	molecular_function	taxon:9823	20150916
I3LVS7	RHOA	GO:0017022	myosin binding	GO_REF:0000107	IEA	molecular_function	taxon:9823	20230703
I3LVS7	RHOA	GO:0098794	postsynapse	GO_REF:0000107	IEA	cellular_component	taxon:9823	20230703
I3LVS7	RHOA	GO:0005886	plasma membrane	PMID:21873635	IBA	cellular_component	taxon:9823	20230603
I3LVS7	RHOA	GO:0007266	Rho protein signal transduction	PMID:25485583	IMP	biological_process	taxon:9823	20150903
I3LVS7	RHOA	GO:0036089	cleavage furrow formation	GO_REF:0000024	ISS	biological_process	taxon:9823	20150916
I3LVS7	RHOA	GO:0051022	Rho GDP-dissociation inhibitor binding	GO_REF:0000024	ISS	molecular_function	taxon:9823	20150916
I3LVS7	RHOA	GO:0045666	positive regulation of neuron differentiation	GO_REF:0000107	IEA	biological_process	taxon:9823	20230703
I3LVS7	RHOA	GO:0033688	regulation of osteoblast proliferation	GO_REF:0000024	ISS	biological_process	taxon:9823	20150916
I3LVS7	RHOA	GO:1903427	negative regulation of reactive oxygen species biosynthetic process	GO_REF:0000107	IEA	biological_process	taxon:9823	20230703
I3LVS7	RHOA	GO:0003100	regulation of systemic arterial blood pressure by endothelin	GO_REF:0000107	IEA	biological_process	taxon:9823	20230703
I3LVS7	RHOA	GO:0035385	Roundabout signaling pathway	GO_REF:0000107	IEA	biological_process	taxon:9823	20230703
I3LVS7	RHOA	GO:0050773	regulation of dendrite development	GO_REF:0000024	ISS	biological_process	taxon:9823	20150916
I3LVS7	RHOA	GO:0007155	cell adhesion	GO_REF:0000024	ISS	biological_process	taxon:9823	20150916
I3LVS7	RHOA	GO:0043931	ossification involved in bone maturation	GO_REF:0000107	IEA	biological_process	taxon:9823	20230703
I3LVS7	RHOA	GO:0034446	substrate adhesion-dependent cell spreading	GO_REF:0000107	IEA	biological_process	taxon:9823	20230703
I3LVS7	RHOA	GO:0050919	negative chemotaxis	GO_REF:0000107	IEA	biological_process	taxon:9823	20230703
I3LVS7	RHOA	GO:0005925	focal adhesion	GO_REF:0000024	ISS	cellular_component	taxon:9823	20150916
I3LVS7	RHOA	GO:0003924	GTPase activity	GO_REF:0000002	IEA	molecular_function	taxon:9823	20230703
I3LVS7	RHOA	GO:0021795	cerebral cortex cell migration	GO_REF:0000107	IEA	biological_process	taxon:9823	20230703
I3LVS7	RHOA	GO:0007519	skeletal muscle tissue development	GO_REF:0000107	IEA	biological_process	taxon:9823	20230703
I3LVS7	RHOA	GO:0032467	positive regulation of cytokinesis	PMID:25485583	IMP	biological_process	taxon:9823	20150903
I3LVS7	RHOA	GO:0033688	regulation of osteoblast proliferation	GO_REF:0000107	IEA	biological_process	taxon:9823	20230703
I3LVS7	RHOA	GO:0051924	regulation of calcium ion transport	GO_REF:0000024	ISS	biological_process	taxon:9823	20150916
I3LVS7	RHOA	GO:1902766	skeletal muscle satellite cell migration	GO_REF:0000024	ISS	biological_process	taxon:9823	20141211
I3LVS7	RHOA	GO:0043297	apical junction assembly	GO_REF:0000107	IEA	biological_process	taxon:9823	20230703
I3LVS7	RHOA	GO:0019901	protein kinase binding	PMID:21873635	IBA	molecular_function	taxon:9823	20230330
I3LVS7	RHOA	GO:0044319	wound healing, spreading of cells	GO_REF:0000024	ISS	biological_process	taxon:9823	20141211
I3LVS7	RHOA	GO:0032154	cleavage furrow	GO_REF:0000107	IEA	cellular_component	taxon:9823	20230703
I3LVS7	RHOA	GO:0005525	GTP binding	GO_REF:0000107	IEA	molecular_function	taxon:9823	20230703
I3LVS7	RHOA	GO:0043197	dendritic spine	GO_REF:0000107	IEA	cellular_component	taxon:9823	20230703
I3LVS7	RHOA	GO:0007010	cytoskeleton organization	GO_REF:0000024	ISS	biological_process	taxon:9823	20150916
I3LVS7	RHOA	GO:0043542	endothelial cell migration	GO_REF:0000107	IEA	biological_process	taxon:9823	20230703
I3LVS7	RHOA	GO:0071222	cellular response to lipopolysaccharide	GO_REF:0000107	IEA	biological_process	taxon:9823	20230703
I3LVS7	RHOA	GO:0090051	negative regulation of cell migration involved in sprouting angiogenesis	GO_REF:0000107	IEA	biological_process	taxon:9823	20230703
I3LVS7	RHOA	GO:0061383	trabecula morphogenesis	GO_REF:0000107	IEA	biological_process	taxon:9823	20230703
I3LVS7	RHOA	GO:0005525	GTP binding	GO_REF:0000043	IEA	molecular_function	taxon:9823	20230703
I3LVS7	RHOA	GO:0005525	GTP binding	GO_REF:0000002	IEA	molecular_function	taxon:9823	20230703
A0A8D0JIT6	A0A8D0JIT6	GO:0016020	membrane	GO_REF:0000043	IEA	cellular_component	taxon:9823	20230703
A0A4X1SJL5	A0A4X1SJL5	GO:0002376	immune system process	GO_REF:0000043	IEA	biological_process	taxon:9823	20230703
A0A4X1SJL5	A0A4X1SJL5	GO:0045087	innate immune response	GO_REF:0000043	IEA	biological_process	taxon:9823	20230703
A0A8D0M7H2	A0A8D0M7H2	GO:0005838	proteasome regulatory particle	GO_REF:0000002	IEA	cellular_component	taxon:9823	20230703
A0A8D0M7H2	A0A8D0M7H2	GO:0000502	proteasome complex	GO_REF:0000117	IEA	cellular_component	taxon:9823	20230703
A0A8D0M7H2	A0A8D0M7H2	GO:0006508	proteolysis	GO_REF:0000002	IEA	biological_process	taxon:9823	20230703
I3LU13	CHST3	GO:0050698	proteoglycan sulfotransferase activity	GO_REF:0000107	IEA	molecular_function	taxon:9823	20230703
I3LU13	CHST3	GO:0008146	sulfotransferase activity	GO_REF:0000117	IEA	molecular_function	taxon:9823	20230703
I3LU13	CHST3	GO:0016740	transferase activity	GO_REF:0000043	IEA	molecular_function	taxon:9823	20230703
I3LU13	CHST3	GO:0008459	chondroitin 6-sulfotransferase activity	GO_REF:0000107	IEA	molecular_function	taxon:9823	20230703
I3LU13	CHST3	GO:0016020	membrane	GO_REF:0000044	IEA	cellular_component	taxon:9823	20230703
I3LU13	CHST3	GO:0030206	chondroitin sulfate biosynthetic process	GO_REF:0000107	IEA	biological_process	taxon:9823	20230703
I3LU13	CHST3	GO:0006790	sulfur compound metabolic process	GO_REF:0000107	IEA	biological_process	taxon:9823	20230703
I3LU13	CHST3	GO:0043029	T cell homeostasis	GO_REF:0000107	IEA	biological_process	taxon:9823	20230703
I3LU13	CHST3	GO:0008146	sulfotransferase activity	GO_REF:0000002	IEA	molecular_function	taxon:9823	20230703
I3LU13	CHST3	GO:0016020	membrane	GO_REF:0000043	IEA	cellular_component	taxon:9823	20230703
I3LU13	CHST3	GO:0005794	Golgi apparatus	GO_REF:0000107	IEA	cellular_component	taxon:9823	20230703
I3LU13	CHST3	GO:0000139	Golgi membrane	GO_REF:0000002	IEA	cellular_component	taxon:9823	20230703
I3LU13	CHST3	GO:0005975	carbohydrate metabolic process	GO_REF:0000002	IEA	biological_process	taxon:9823	20230703
A0A8D0J102	A0A8D0J102	GO:0005509	calcium ion binding	GO_REF:0000104	IEA	molecular_function	taxon:9823	20230703
A0A8D0J102	A0A8D0J102	GO:0008201	heparin binding	GO_REF:0000043	IEA	molecular_function	taxon:9823	20230703
A0A8D0J102	A0A8D0J102	GO:0007155	cell adhesion	GO_REF:0000002	IEA	biological_process	taxon:9823	20230703
A0A8D0J102	A0A8D0J102	GO:0007155	cell adhesion	GO_REF:0000043	IEA	biological_process	taxon:9823	20230703
A0A8D0J102	A0A8D0J102	GO:0005509	calcium ion binding	GO_REF:0000002	IEA	molecular_function	taxon:9823	20230703
A0A8D0J102	A0A8D0J102	GO:0110165	cellular anatomical entity	GO_REF:0000117	IEA	cellular_component	taxon:9823	20230703
A0A8D0J102	A0A8D0J102	GO:0005576	extracellular region	GO_REF:0000002	IEA	cellular_component	taxon:9823	20230703
F1SUG3	VPS26A	GO:0005768	endosome	GO_REF:0000043	IEA	cellular_component	taxon:9823	20230703
F1SUG3	VPS26A	GO:0006886	intracellular protein transport	GO_REF:0000002	IEA	biological_process	taxon:9823	20230703
A0A8D0MKX8	A0A8D0MKX8	GO:0019888	protein phosphatase regulator activity	GO_REF:0000002	IEA	molecular_function	taxon:9823	20230703
A0A8D0MKX8	A0A8D0MKX8	GO:0000159	protein phosphatase type 2A complex	GO_REF:0000104	IEA	cellular_component	taxon:9823	20230703
A0A8D0MKX8	A0A8D0MKX8	GO:0000159	protein phosphatase type 2A complex	GO_REF:0000002	IEA	cellular_component	taxon:9823	20230703
A0A8D1JPI5	A0A8D1JPI5	GO:0006412	translation	GO_REF:0000043	IEA	biological_process	taxon:9823	20230703
A0A8D1JPI5	A0A8D1JPI5	GO:0005737	cytoplasm	GO_REF:0000002	IEA	cellular_component	taxon:9823	20230703
A0A8D1JPI5	A0A8D1JPI5	GO:0005524	ATP binding	GO_REF:0000043	IEA	molecular_function	taxon:9823	20230703
A0A8D1JPI5	A0A8D1JPI5	GO:0004814	arginine-tRNA ligase activity	GO_REF:0000002	IEA	molecular_function	taxon:9823	20230703
A0A8D1JPI5	A0A8D1JPI5	GO:0004812	aminoacyl-tRNA ligase activity	GO_REF:0000043	IEA	molecular_function	taxon:9823	20230703
A0A8D1JPI5	A0A8D1JPI5	GO:0004812	aminoacyl-tRNA ligase activity	GO_REF:0000002	IEA	molecular_function	taxon:9823	20230703
A0A8D1JPI5	A0A8D1JPI5	GO:0000166	nucleotide binding	GO_REF:0000043	IEA	molecular_function	taxon:9823	20230703
A0A8D1JPI5	A0A8D1JPI5	GO:0006420	arginyl-tRNA aminoacylation	GO_REF:0000002	IEA	biological_process	taxon:9823	20230703
A0A8D1JPI5	A0A8D1JPI5	GO:0000166	nucleotide binding	GO_REF:0000002	IEA	molecular_function	taxon:9823	20230703
A0A8D1JPI5	A0A8D1JPI5	GO:0016874	ligase activity	GO_REF:0000043	IEA	molecular_function	taxon:9823	20230703
A0A8D1JPI5	A0A8D1JPI5	GO:0006418	tRNA aminoacylation for protein translation	GO_REF:0000002	IEA	biological_process	taxon:9823	20230703
A0A8D1JPI5	A0A8D1JPI5	GO:0005524	ATP binding	GO_REF:0000002	IEA	molecular_function	taxon:9823	20230703
A0A8D0QYB8	PRDX3	GO:0051920	peroxiredoxin activity	GO_REF:0000002	IEA	molecular_function	taxon:9823	20230703
A0A8D0QYB8	PRDX3	GO:0016209	antioxidant activity	GO_REF:0000002	IEA	molecular_function	taxon:9823	20230703
A0A8D0QYB8	PRDX3	GO:0016209	antioxidant activity	GO_REF:0000043	IEA	molecular_function	taxon:9823	20230703
A0A8D0QYB8	PRDX3	GO:0016491	oxidoreductase activity	GO_REF:0000043	IEA	molecular_function	taxon:9823	20230703
A0A8D0QYB8	PRDX3	GO:0016491	oxidoreductase activity	GO_REF:0000002	IEA	molecular_function	taxon:9823	20230703
A0A8D0QYB8	PRDX3	GO:0098869	cellular oxidant detoxification	GO_REF:0000108	IEA	biological_process	taxon:9823	20230705
A0A8D0QYB8	PRDX3	GO:0004601	peroxidase activity	GO_REF:0000043	IEA	molecular_function	taxon:9823	20230703
A0A8W4FB55	PAPSS1	GO:0008152	metabolic process	GO_REF:0000043	IEA	biological_process	taxon:9823	20230703
A0A8W4FB55	PAPSS1	GO:0004020	adenylylsulfate kinase activity	GO_REF:0000002	IEA	molecular_function	taxon:9823	20230703
A0A8W4FB55	PAPSS1	GO:0000103	sulfate assimilation	GO_REF:0000002	IEA	biological_process	taxon:9823	20230703
A0A8W4FB55	PAPSS1	GO:0005524	ATP binding	GO_REF:0000043	IEA	molecular_function	taxon:9823	20230703
A0A8W4FB55	PAPSS1	GO:0016779	nucleotidyltransferase activity	GO_REF:0000043	IEA	molecular_function	taxon:9823	20230703
A0A8W4FB55	PAPSS1	GO:0004781	sulfate adenylyltransferase (ATP) activity	GO_REF:0000002	IEA	molecular_function	taxon:9823	20230703
A0A8W4FB55	PAPSS1	GO:0016740	transferase activity	GO_REF:0000043	IEA	molecular_function	taxon:9823	20230703
A0A8W4FB55	PAPSS1	GO:0003824	catalytic activity	GO_REF:0000043	IEA	molecular_function	taxon:9823	20230703
A0A8W4FB55	PAPSS1	GO:0006790	sulfur compound metabolic process	GO_REF:0000117	IEA	biological_process	taxon:9823	20230703
A0A8W4FB55	PAPSS1	GO:0000166	nucleotide binding	GO_REF:0000043	IEA	molecular_function	taxon:9823	20230703
A0A8W4FB55	PAPSS1	GO:0005524	ATP binding	GO_REF:0000002	IEA	molecular_function	taxon:9823	20230703
A0A8D0MJU2	A0A8D0MJU2	GO:0005856	cytoskeleton	GO_REF:0000044	IEA	cellular_component	taxon:9823	20230703
A0A8D0MJU2	A0A8D0MJU2	GO:0005856	cytoskeleton	GO_REF:0000002	IEA	cellular_component	taxon:9823	20230703
A0A8D0MJU2	A0A8D0MJU2	GO:0005200	structural constituent of cytoskeleton	GO_REF:0000002	IEA	molecular_function	taxon:9823	20230703
A0A8D0MJU2	A0A8D0MJU2	GO:0001726	ruffle	GO_REF:0000002	IEA	cellular_component	taxon:9823	20230703
A0A8D0MJU2	A0A8D0MJU2	GO:0003779	actin binding	GO_REF:0000002	IEA	molecular_function	taxon:9823	20230703
A0A8D0MJU2	A0A8D0MJU2	GO:0005925	focal adhesion	GO_REF:0000002	IEA	cellular_component	taxon:9823	20230703
A0A8D0MJU2	A0A8D0MJU2	GO:0051015	actin filament binding	GO_REF:0000002	IEA	molecular_function	taxon:9823	20230703
A0A8D0MJU2	A0A8D0MJU2	GO:0007010	cytoskeleton organization	GO_REF:0000108	IEA	biological_process	taxon:9823	20230705
A0A8D0MJU2	A0A8D0MJU2	GO:0007155	cell adhesion	GO_REF:0000002	IEA	biological_process	taxon:9823	20230703
A0A8D0MJU2	A0A8D0MJU2	GO:0005737	cytoplasm	GO_REF:0000043	IEA	cellular_component	taxon:9823	20230703
A0A8D1QPM0	RTCB	GO:0016874	ligase activity	GO_REF:0000043	IEA	molecular_function	taxon:9823	20230703
A0A8D1QPM0	RTCB	GO:0005737	cytoplasm	GO_REF:0000043	IEA	cellular_component	taxon:9823	20230703
A0A8D1QPM0	RTCB	GO:0005525	GTP binding	GO_REF:0000043	IEA	molecular_function	taxon:9823	20230703
A0A8D1QPM0	RTCB	GO:0006388	tRNA splicing, via endonucleolytic cleavage and ligation	GO_REF:0000104	IEA	biological_process	taxon:9823	20230703
A0A8D1QPM0	RTCB	GO:0046872	metal ion binding	GO_REF:0000043	IEA	molecular_function	taxon:9823	20230703
A0A8D1QPM0	RTCB	GO:0008452	RNA ligase activity	GO_REF:0000002	IEA	molecular_function	taxon:9823	20230703
A0A8D1QPM0	RTCB	GO:0006388	tRNA splicing, via endonucleolytic cleavage and ligation	GO_REF:0000002	IEA	biological_process	taxon:9823	20230703
A0A8D1QPM0	RTCB	GO:0003972	RNA ligase (ATP) activity	GO_REF:0000002	IEA	molecular_function	taxon:9823	20230703
A0A8D1QPM0	RTCB	GO:0016886	ligase activity, forming phosphoric ester bonds	GO_REF:0000104	IEA	molecular_function	taxon:9823	20230703
A0A8D1QPM0	RTCB	GO:0008033	tRNA processing	GO_REF:0000043	IEA	biological_process	taxon:9823	20230703
A0A8D1QPM0	RTCB	GO:0072669	tRNA-splicing ligase complex	GO_REF:0000002	IEA	cellular_component	taxon:9823	20230703
A0A8D1QPM0	RTCB	GO:0006396	RNA processing	GO_REF:0000002	IEA	biological_process	taxon:9823	20230703
A0A8D1QPM0	RTCB	GO:0005737	cytoplasm	GO_REF:0000044	IEA	cellular_component	taxon:9823	20230703
A0A8D1QPM0	RTCB	GO:0072669	tRNA-splicing ligase complex	GO_REF:0000104	IEA	cellular_component	taxon:9823	20230703
A0A8D1QPM0	RTCB	GO:0000166	nucleotide binding	GO_REF:0000043	IEA	molecular_function	taxon:9823	20230703
A0A8D0U7R1	A0A8D0U7R1	GO:0004084	branched-chain-amino-acid transaminase activity	GO_REF:0000002	IEA	molecular_function	taxon:9823	20230703
A0A8D0U7R1	A0A8D0U7R1	GO:0008483	transaminase activity	GO_REF:0000043	IEA	molecular_function	taxon:9823	20230703
A0A8D0U7R1	A0A8D0U7R1	GO:0009081	branched-chain amino acid metabolic process	GO_REF:0000002	IEA	biological_process	taxon:9823	20230703
A0A8D0U7R1	A0A8D0U7R1	GO:0009082	branched-chain amino acid biosynthetic process	GO_REF:0000043	IEA	biological_process	taxon:9823	20230703
A0A8D0U7R1	A0A8D0U7R1	GO:0008652	amino acid biosynthetic process	GO_REF:0000043	IEA	biological_process	taxon:9823	20230703
A0A8D0U7R1	A0A8D0U7R1	GO:0016740	transferase activity	GO_REF:0000043	IEA	molecular_function	taxon:9823	20230703
A0A8D0U7R1	A0A8D0U7R1	GO:0003824	catalytic activity	GO_REF:0000002	IEA	molecular_function	taxon:9823	20230703
A0A4X1VGE1	A0A4X1VGE1	GO:0005737	cytoplasm	GO_REF:0000043	IEA	cellular_component	taxon:9823	20230703
A0A4X1VGE1	A0A4X1VGE1	GO:0005737	cytoplasm	GO_REF:0000044	IEA	cellular_component	taxon:9823	20230703
A0A8D1MHT5	A0A8D1MHT5	GO:0006457	protein folding	GO_REF:0000002	IEA	biological_process	taxon:9823	20230703
A0A8D1MHT5	A0A8D1MHT5	GO:0051082	unfolded protein binding	GO_REF:0000002	IEA	molecular_function	taxon:9823	20230703
A0A8D1C5U5	A0A8D1C5U5	GO:0030126	COPI vesicle coat	GO_REF:0000104	IEA	cellular_component	taxon:9823	20230703
A0A8D1C5U5	A0A8D1C5U5	GO:0005794	Golgi apparatus	GO_REF:0000043	IEA	cellular_component	taxon:9823	20230703
A0A8D1C5U5	A0A8D1C5U5	GO:0030663	COPI-coated vesicle membrane	GO_REF:0000044	IEA	cellular_component	taxon:9823	20230703
A0A8D1C5U5	A0A8D1C5U5	GO:0016020	membrane	GO_REF:0000043	IEA	cellular_component	taxon:9823	20230703
A0A8D1C5U5	A0A8D1C5U5	GO:0005794	Golgi apparatus	GO_REF:0000117	IEA	cellular_component	taxon:9823	20230703
A0A8D1C5U5	A0A8D1C5U5	GO:0005737	cytoplasm	GO_REF:0000044	IEA	cellular_component	taxon:9823	20230703
A0A8D1C5U5	A0A8D1C5U5	GO:0000139	Golgi membrane	GO_REF:0000044	IEA	cellular_component	taxon:9823	20230703
A0A8D1C5U5	A0A8D1C5U5	GO:0005198	structural molecule activity	GO_REF:0000002	IEA	molecular_function	taxon:9823	20230703
A0A8D1C5U5	A0A8D1C5U5	GO:0016192	vesicle-mediated transport	GO_REF:0000002	IEA	biological_process	taxon:9823	20230703
A0A8D1C5U5	A0A8D1C5U5	GO:0030117	membrane coat	GO_REF:0000002	IEA	cellular_component	taxon:9823	20230703
A0A8D1C5U5	A0A8D1C5U5	GO:0006888	endoplasmic reticulum to Golgi vesicle-mediated transport	GO_REF:0000002	IEA	biological_process	taxon:9823	20230703
A0A8D1C5U5	A0A8D1C5U5	GO:0005737	cytoplasm	GO_REF:0000043	IEA	cellular_component	taxon:9823	20230703
A0A8D1C5U5	A0A8D1C5U5	GO:0016192	vesicle-mediated transport	GO_REF:0000043	IEA	biological_process	taxon:9823	20230703
A0A8D1C5U5	A0A8D1C5U5	GO:0015031	protein transport	GO_REF:0000043	IEA	biological_process	taxon:9823	20230703
A0A8D1C5U5	A0A8D1C5U5	GO:0006886	intracellular protein transport	GO_REF:0000002	IEA	biological_process	taxon:9823	20230703
A0A8D1C5U5	A0A8D1C5U5	GO:0030126	COPI vesicle coat	GO_REF:0000002	IEA	cellular_component	taxon:9823	20230703
A0A8D1C5U5	A0A8D1C5U5	GO:0016020	membrane	GO_REF:0000044	IEA	cellular_component	taxon:9823	20230703
A0A8D1C5U5	A0A8D1C5U5	GO:0006886	intracellular protein transport	GO_REF:0000104	IEA	biological_process	taxon:9823	20230703
A0A8D0K2S8	A0A8D0K2S8	GO:0005789	endoplasmic reticulum membrane	GO_REF:0000104	IEA	cellular_component	taxon:9823	20230703
A0A8D0K2S8	A0A8D0K2S8	GO:0016020	membrane	GO_REF:0000044	IEA	cellular_component	taxon:9823	20230703
A0A8D0K2S8	A0A8D0K2S8	GO:0016020	membrane	GO_REF:0000043	IEA	cellular_component	taxon:9823	20230703
A0A8D0K2S8	A0A8D0K2S8	GO:0005789	endoplasmic reticulum membrane	GO_REF:0000044	IEA	cellular_component	taxon:9823	20230703
A0A8D0K2S8	A0A8D0K2S8	GO:0005789	endoplasmic reticulum membrane	GO_REF:0000002	IEA	cellular_component	taxon:9823	20230703
A0A8D0K2S8	A0A8D0K2S8	GO:0005783	endoplasmic reticulum	GO_REF:0000043	IEA	cellular_component	taxon:9823	20230703
A0A8D0NUL0	A0A8D0NUL0	GO:0008092	cytoskeletal protein binding	GO_REF:0000117	IEA	molecular_function	taxon:9823	20230703
A0A8D0NUL0	A0A8D0NUL0	GO:0006936	muscle contraction	GO_REF:0000002	IEA	biological_process	taxon:9823	20230703
A0A8D0NUL0	A0A8D0NUL0	GO:0005516	calmodulin binding	GO_REF:0000002	IEA	molecular_function	taxon:9823	20230703
A0A8D0NUL0	A0A8D0NUL0	GO:0017022	myosin binding	GO_REF:0000002	IEA	molecular_function	taxon:9823	20230703
A0A8D0NUL0	A0A8D0NUL0	GO:0003779	actin binding	GO_REF:0000002	IEA	molecular_function	taxon:9823	20230703
A0A480HYA9	A0A480HYA9	GO:0030246	carbohydrate binding	GO_REF:0000043	IEA	molecular_function	taxon:9823	20230703
A0A480HYA9	A0A480HYA9	GO:0006897	endocytosis	GO_REF:0000043	IEA	biological_process	taxon:9823	20230703
A0A480HYA9	A0A480HYA9	GO:0016020	membrane	GO_REF:0000043	IEA	cellular_component	taxon:9823	20230703
A0A8D0HMR5	A0A8D0HMR5	GO:0003743	translation initiation factor activity	GO_REF:0000002	IEA	molecular_function	taxon:9823	20230703
A0A8D0HMR5	A0A8D0HMR5	GO:0005737	cytoplasm	GO_REF:0000002	IEA	cellular_component	taxon:9823	20230703
A0A8D0HMR5	A0A8D0HMR5	GO:0005852	eukaryotic translation initiation factor 3 complex	GO_REF:0000002	IEA	cellular_component	taxon:9823	20230703
A0A8D0HMR5	A0A8D0HMR5	GO:0006413	translational initiation	GO_REF:0000108	IEA	biological_process	taxon:9823	20230705
A0A5G2RDZ2	SLC25A6	GO:0016020	membrane	GO_REF:0000043	IEA	cellular_component	taxon:9823	20230703
A0A5G2RDZ2	SLC25A6	GO:0005471	ATP:ADP antiporter activity	GO_REF:0000104	IEA	molecular_function	taxon:9823	20230703
A0A5G2RDZ2	SLC25A6	GO:0016020	membrane	GO_REF:0000107	IEA	cellular_component	taxon:9823	20230703
A0A5G2RDZ2	SLC25A6	GO:0005743	mitochondrial inner membrane	GO_REF:0000002	IEA	cellular_component	taxon:9823	20230703
A0A5G2RDZ2	SLC25A6	GO:0140021	mitochondrial ADP transmembrane transport	GO_REF:0000002	IEA	biological_process	taxon:9823	20230703
A0A5G2RDZ2	SLC25A6	GO:0005739	mitochondrion	GO_REF:0000117	IEA	cellular_component	taxon:9823	20230703
A0A5G2RDZ2	SLC25A6	GO:1990544	mitochondrial ATP transmembrane transport	GO_REF:0000002	IEA	biological_process	taxon:9823	20230703
A0A5G2RDZ2	SLC25A6	GO:0016020	membrane	GO_REF:0000104	IEA	cellular_component	taxon:9823	20230703
A0A5G2RDZ2	SLC25A6	GO:0005471	ATP:ADP antiporter activity	GO_REF:0000002	IEA	molecular_function	taxon:9823	20230703
A0A5G2RDZ2	SLC25A6	GO:0055085	transmembrane transport	GO_REF:0000002	IEA	biological_process	taxon:9823	20230703
A0A5G2RDZ2	SLC25A6	GO:0005739	mitochondrion	GO_REF:0000107	IEA	cellular_component	taxon:9823	20230703
A0A5G2RDZ2	SLC25A6	GO:0016020	membrane	GO_REF:0000044	IEA	cellular_component	taxon:9823	20230703
A0A8D1ZXM0	EEF2	GO:0005525	GTP binding	GO_REF:0000002	IEA	molecular_function	taxon:9823	20230703
A0A8D1ZXM0	EEF2	GO:0003746	translation elongation factor activity	GO_REF:0000002	IEA	molecular_function	taxon:9823	20230703
A0A8D1ZXM0	EEF2	GO:0006412	translation	GO_REF:0000043	IEA	biological_process	taxon:9823	20230703
A0A8D1ZXM0	EEF2	GO:0005525	GTP binding	GO_REF:0000043	IEA	molecular_function	taxon:9823	20230703
A0A8D1ZXM0	EEF2	GO:0005737	cytoplasm	GO_REF:0000117	IEA	cellular_component	taxon:9823	20230703
A0A8D1ZXM0	EEF2	GO:0003924	GTPase activity	GO_REF:0000002	IEA	molecular_function	taxon:9823	20230703
A0A8D1ZXM0	EEF2	GO:0006414	translational elongation	GO_REF:0000108	IEA	biological_process	taxon:9823	20230705
A0A8D1ZXM0	EEF2	GO:0000166	nucleotide binding	GO_REF:0000043	IEA	molecular_function	taxon:9823	20230703
A0A8D1ZXM0	EEF2	GO:0006412	translation	GO_REF:0000117	IEA	biological_process	taxon:9823	20230703
A0A8D1VPG1	CHID1	GO:0005975	carbohydrate metabolic process	GO_REF:0000002	IEA	biological_process	taxon:9823	20230703
A0A8D1VPG1	CHID1	GO:0008061	chitin binding	GO_REF:0000002	IEA	molecular_function	taxon:9823	20230703
A0A8D1YC87	MAN2B1	GO:0008152	metabolic process	GO_REF:0000043	IEA	biological_process	taxon:9823	20230703
A0A8D1YC87	MAN2B1	GO:0006013	mannose metabolic process	GO_REF:0000002	IEA	biological_process	taxon:9823	20230703
A0A8D1YC87	MAN2B1	GO:0005975	carbohydrate metabolic process	GO_REF:0000002	IEA	biological_process	taxon:9823	20230703
A0A8D1YC87	MAN2B1	GO:0030246	carbohydrate binding	GO_REF:0000002	IEA	molecular_function	taxon:9823	20230703
A0A8D1YC87	MAN2B1	GO:0004559	alpha-mannosidase activity	GO_REF:0000002	IEA	molecular_function	taxon:9823	20230703
A0A8D1YC87	MAN2B1	GO:0046872	metal ion binding	GO_REF:0000043	IEA	molecular_function	taxon:9823	20230703
A0A8D1YC87	MAN2B1	GO:0016798	hydrolase activity, acting on glycosyl bonds	GO_REF:0000043	IEA	molecular_function	taxon:9823	20230703
A0A8D1YC87	MAN2B1	GO:0016787	hydrolase activity	GO_REF:0000043	IEA	molecular_function	taxon:9823	20230703
A0A8D1YC87	MAN2B1	GO:0003824	catalytic activity	GO_REF:0000002	IEA	molecular_function	taxon:9823	20230703
A0A8D1VZY7	A0A8D1VZY7	GO:0005576	extracellular region	GO_REF:0000043	IEA	cellular_component	taxon:9823	20230703
A0A480YQL4	A0A480YQL4	GO:0005759	mitochondrial matrix	GO_REF:0000044	IEA	cellular_component	taxon:9823	20230703
A0A480YQL4	A0A480YQL4	GO:0006801	superoxide metabolic process	GO_REF:0000002	IEA	biological_process	taxon:9823	20230703
A0A480YQL4	A0A480YQL4	GO:0004784	superoxide dismutase activity	GO_REF:0000003	IEA	molecular_function	taxon:9823	20230703
A0A480YQL4	A0A480YQL4	GO:0046872	metal ion binding	GO_REF:0000002	IEA	molecular_function	taxon:9823	20230703
A0A480YQL4	A0A480YQL4	GO:0046872	metal ion binding	GO_REF:0000043	IEA	molecular_function	taxon:9823	20230703
A0A480YQL4	A0A480YQL4	GO:0004784	superoxide dismutase activity	GO_REF:0000002	IEA	molecular_function	taxon:9823	20230703
A0A480YQL4	A0A480YQL4	GO:0072593	reactive oxygen species metabolic process	GO_REF:0000117	IEA	biological_process	taxon:9823	20230703
A0A480YQL4	A0A480YQL4	GO:0016491	oxidoreductase activity	GO_REF:0000043	IEA	molecular_function	taxon:9823	20230703
A0A480YQL4	A0A480YQL4	GO:0019430	removal of superoxide radicals	GO_REF:0000108	IEA	biological_process	taxon:9823	20230705
A0A385JGP0	LDHA	GO:1990204	oxidoreductase complex	GO_REF:0000107	IEA	cellular_component	taxon:9823	20230703
A0A385JGP0	LDHA	GO:0004459	L-lactate dehydrogenase activity	GO_REF:0000116	IEA	molecular_function	taxon:9823	20230703
A0A385JGP0	LDHA	GO:0004459	L-lactate dehydrogenase activity	GO_REF:0000107	IEA	molecular_function	taxon:9823	20230703
A0A385JGP0	LDHA	GO:0019752	carboxylic acid metabolic process	GO_REF:0000002	IEA	biological_process	taxon:9823	20230703
A0A385JGP0	LDHA	GO:0006090	pyruvate metabolic process	GO_REF:0000107	IEA	biological_process	taxon:9823	20230703
A0A385JGP0	LDHA	GO:0016491	oxidoreductase activity	GO_REF:0000043	IEA	molecular_function	taxon:9823	20230703
A0A385JGP0	LDHA	GO:0006089	lactate metabolic process	GO_REF:0000107	IEA	biological_process	taxon:9823	20230703
A0A385JGP0	LDHA	GO:0004459	L-lactate dehydrogenase activity	GO_REF:0000003	IEA	molecular_function	taxon:9823	20230703
A0A385JGP0	LDHA	GO:0005737	cytoplasm	GO_REF:0000002	IEA	cellular_component	taxon:9823	20230703
A0A385JGP0	LDHA	GO:0004459	L-lactate dehydrogenase activity	GO_REF:0000002	IEA	molecular_function	taxon:9823	20230703
A0A385JGP0	LDHA	GO:0016491	oxidoreductase activity	GO_REF:0000002	IEA	molecular_function	taxon:9823	20230703
A0A385JGP0	LDHA	GO:0016616	oxidoreductase activity, acting on the CH-OH group of donors, NAD or NADP as acceptor	GO_REF:0000002	IEA	molecular_function	taxon:9823	20230703
A0A385JGP0	LDHA	GO:0042802	identical protein binding	GO_REF:0000107	IEA	molecular_function	taxon:9823	20230703
A0A385JGP0	LDHA	GO:0003824	catalytic activity	GO_REF:0000002	IEA	molecular_function	taxon:9823	20230703
A0A8D0R3S6	A0A8D0R3S6	GO:0004859	phospholipase inhibitor activity	GO_REF:0000002	IEA	molecular_function	taxon:9823	20230703
A0A8D0R3S6	A0A8D0R3S6	GO:0005544	calcium-dependent phospholipid binding	GO_REF:0000002	IEA	molecular_function	taxon:9823	20230703
A0A8D0R3S6	A0A8D0R3S6	GO:0005509	calcium ion binding	GO_REF:0000002	IEA	molecular_function	taxon:9823	20230703
A0A8D0R3S6	A0A8D0R3S6	GO:0005544	calcium-dependent phospholipid binding	GO_REF:0000043	IEA	molecular_function	taxon:9823	20230703
A0A8D0R3S6	A0A8D0R3S6	GO:0005576	extracellular region	GO_REF:0000043	IEA	cellular_component	taxon:9823	20230703
A0A8D0R3S6	A0A8D0R3S6	GO:0005604	basement membrane	GO_REF:0000044	IEA	cellular_component	taxon:9823	20230703
A0A8D0R3S6	A0A8D0R3S6	GO:0016020	membrane	GO_REF:0000044	IEA	cellular_component	taxon:9823	20230703
A0A8D0R3S6	A0A8D0R3S6	GO:0005604	basement membrane	GO_REF:0000043	IEA	cellular_component	taxon:9823	20230703
A0A8D0R3S6	A0A8D0R3S6	GO:0008092	cytoskeletal protein binding	GO_REF:0000002	IEA	molecular_function	taxon:9823	20230703
A0A8W4FHU8	NDUFS8	GO:0016651	oxidoreductase activity, acting on NAD(P)H	GO_REF:0000002	IEA	molecular_function	taxon:9823	20230703
A0A8W4FHU8	NDUFS8	GO:0051539	4 iron, 4 sulfur cluster binding	GO_REF:0000043	IEA	molecular_function	taxon:9823	20230703
A0A8W4FHU8	NDUFS8	GO:0051539	4 iron, 4 sulfur cluster binding	GO_REF:0000002	IEA	molecular_function	taxon:9823	20230703
A0A8W4FHU8	NDUFS8	GO:0070469	respirasome	GO_REF:0000043	IEA	cellular_component	taxon:9823	20230703
A0A8W4FHU8	NDUFS8	GO:0016020	membrane	GO_REF:0000002	IEA	cellular_component	taxon:9823	20230703
A0A8D0Q8X1	A0A8D0Q8X1	GO:0016020	membrane	GO_REF:0000044	IEA	cellular_component	taxon:9823	20230703
A0A8D0Q8X1	A0A8D0Q8X1	GO:0005604	basement membrane	GO_REF:0000044	IEA	cellular_component	taxon:9823	20230703
A0A8D0VK64	A0A8D0VK64	GO:0004869	cysteine-type endopeptidase inhibitor activity	GO_REF:0000002	IEA	molecular_function	taxon:9823	20230703
A0A8D1C1K6	CLTC	GO:0016020	membrane	GO_REF:0000043	IEA	cellular_component	taxon:9823	20230703
A0A8D1C1K6	CLTC	GO:0006886	intracellular protein transport	GO_REF:0000104	IEA	biological_process	taxon:9823	20230703
A0A8D1C1K6	CLTC	GO:0005905	clathrin-coated pit	GO_REF:0000043	IEA	cellular_component	taxon:9823	20230703
A0A8D1C1K6	CLTC	GO:0031410	cytoplasmic vesicle	GO_REF:0000043	IEA	cellular_component	taxon:9823	20230703
A0A8D1C1K6	CLTC	GO:0030130	clathrin coat of trans-Golgi network vesicle	GO_REF:0000002	IEA	cellular_component	taxon:9823	20230703
A0A8D1C1K6	CLTC	GO:0006886	intracellular protein transport	GO_REF:0000002	IEA	biological_process	taxon:9823	20230703
A0A8D1C1K6	CLTC	GO:0016020	membrane	GO_REF:0000044	IEA	cellular_component	taxon:9823	20230703
A0A8D1C1K6	CLTC	GO:0005198	structural molecule activity	GO_REF:0000002	IEA	molecular_function	taxon:9823	20230703
A0A8D1C1K6	CLTC	GO:0030132	clathrin coat of coated pit	GO_REF:0000002	IEA	cellular_component	taxon:9823	20230703
A0A8D1C1K6	CLTC	GO:0016192	vesicle-mediated transport	GO_REF:0000002	IEA	biological_process	taxon:9823	20230703
A0A8D1C1K6	CLTC	GO:0032051	clathrin light chain binding	GO_REF:0000002	IEA	molecular_function	taxon:9823	20230703
A0A8D1C1K6	CLTC	GO:0030659	cytoplasmic vesicle membrane	GO_REF:0000044	IEA	cellular_component	taxon:9823	20230703
A0A8D1C1K6	CLTC	GO:0071439	clathrin complex	GO_REF:0000002	IEA	cellular_component	taxon:9823	20230703
F2Z5C1	ANXA5	GO:0005544	calcium-dependent phospholipid binding	GO_REF:0000002	IEA	molecular_function	taxon:9823	20230703
F2Z5C1	ANXA5	GO:0005544	calcium-dependent phospholipid binding	GO_REF:0000043	IEA	molecular_function	taxon:9823	20230703
F2Z5C1	ANXA5	GO:0050819	negative regulation of coagulation	GO_REF:0000002	IEA	biological_process	taxon:9823	20230703
F2Z5C1	ANXA5	GO:0005544	calcium-dependent phospholipid binding	GO_REF:0000107	IEA	molecular_function	taxon:9823	20230703
F2Z5C1	ANXA5	GO:0005509	calcium ion binding	GO_REF:0000002	IEA	molecular_function	taxon:9823	20230703
F2Z5C1	ANXA5	GO:0005737	cytoplasm	PMID:21873635	IBA	cellular_component	taxon:9823	20230602
F2Z5C1	ANXA5	GO:0005509	calcium ion binding	PMID:21873635	IBA	molecular_function	taxon:9823	20230602
F2Z5C1	ANXA5	GO:0042383	sarcolemma	PMID:21873635	IBA	cellular_component	taxon:9823	20230314
A0A8I8C3K7	HSP90AA1	GO:0031396	regulation of protein ubiquitination	GO_REF:0000107	IEA	biological_process	taxon:9823	20230703
A0A8I8C3K7	HSP90AA1	GO:0045429	positive regulation of nitric oxide biosynthetic process	GO_REF:0000107	IEA	biological_process	taxon:9823	20230703
A0A8I8C3K7	HSP90AA1	GO:0007004	telomere maintenance via telomerase	GO_REF:0000107	IEA	biological_process	taxon:9823	20230703
A0A8I8C3K7	HSP90AA1	GO:0005737	cytoplasm	GO_REF:0000107	IEA	cellular_component	taxon:9823	20230703
A0A8I8C3K7	HSP90AA1	GO:0032728	positive regulation of interferon-beta production	GO_REF:0000107	IEA	biological_process	taxon:9823	20230703
A0A8I8C3K7	HSP90AA1	GO:0051131	chaperone-mediated protein complex assembly	GO_REF:0000107	IEA	biological_process	taxon:9823	20230703
A0A8I8C3K7	HSP90AA1	GO:0048471	perinuclear region of cytoplasm	GO_REF:0000107	IEA	cellular_component	taxon:9823	20230703
A0A8I8C3K7	HSP90AA1	GO:0042826	histone deacetylase binding	GO_REF:0000107	IEA	molecular_function	taxon:9823	20230703
A0A8I8C3K7	HSP90AA1	GO:0044294	dendritic growth cone	GO_REF:0000107	IEA	cellular_component	taxon:9823	20230703
A0A8I8C3K7	HSP90AA1	GO:1905323	telomerase holoenzyme complex assembly	GO_REF:0000107	IEA	biological_process	taxon:9823	20230703
A0A8I8C3K7	HSP90AA1	GO:0002230	positive regulation of defense response to virus by host	GO_REF:0000107	IEA	biological_process	taxon:9823	20230703
A0A8I8C3K7	HSP90AA1	GO:0030010	establishment of cell polarity	GO_REF:0000107	IEA	biological_process	taxon:9823	20230703
A0A8I8C3K7	HSP90AA1	GO:0005829	cytosol	GO_REF:0000107	IEA	cellular_component	taxon:9823	20230703
A0A8I8C3K7	HSP90AA1	GO:0045040	protein insertion into mitochondrial outer membrane	GO_REF:0000107	IEA	biological_process	taxon:9823	20230703
A0A8I8C3K7	HSP90AA1	GO:0042470	melanosome	GO_REF:0000044	IEA	cellular_component	taxon:9823	20230703
A0A8I8C3K7	HSP90AA1	GO:0032991	protein-containing complex	GO_REF:0000107	IEA	cellular_component	taxon:9823	20230703
A0A8I8C3K7	HSP90AA1	GO:0044183	protein folding chaperone	GO_REF:0000107	IEA	molecular_function	taxon:9823	20230703
A0A8I8C3K7	HSP90AA1	GO:0042981	regulation of apoptotic process	GO_REF:0000107	IEA	biological_process	taxon:9823	20230703
A0A8I8C3K7	HSP90AA1	GO:0031625	ubiquitin protein ligase binding	GO_REF:0000107	IEA	molecular_function	taxon:9823	20230703
A0A8I8C3K7	HSP90AA1	GO:0006457	protein folding	GO_REF:0000002	IEA	biological_process	taxon:9823	20230703
A0A8I8C3K7	HSP90AA1	GO:0016887	ATP hydrolysis activity	GO_REF:0000107	IEA	molecular_function	taxon:9823	20230703
A0A8I8C3K7	HSP90AA1	GO:0005737	cytoplasm	GO_REF:0000117	IEA	cellular_component	taxon:9823	20230703
A0A8I8C3K7	HSP90AA1	GO:0006457	protein folding	GO_REF:0000107	IEA	biological_process	taxon:9823	20230703
A0A8I8C3K7	HSP90AA1	GO:0032880	regulation of protein localization	GO_REF:0000107	IEA	biological_process	taxon:9823	20230703
A0A8I8C3K7	HSP90AA1	GO:0042802	identical protein binding	GO_REF:0000107	IEA	molecular_function	taxon:9823	20230703
A0A8I8C3K7	HSP90AA1	GO:0005524	ATP binding	GO_REF:0000002	IEA	molecular_function	taxon:9823	20230703
A0A8I8C3K7	HSP90AA1	GO:0005739	mitochondrion	GO_REF:0000107	IEA	cellular_component	taxon:9823	20230703
A0A8I8C3K7	HSP90AA1	GO:0034605	cellular response to heat	GO_REF:0000107	IEA	biological_process	taxon:9823	20230703
A0A8I8C3K7	HSP90AA1	GO:0098586	cellular response to virus	GO_REF:0000107	IEA	biological_process	taxon:9823	20230703
A0A8I8C3K7	HSP90AA1	GO:0050821	protein stabilization	GO_REF:0000107	IEA	biological_process	taxon:9823	20230703
A0A8I8C3K7	HSP90AA1	GO:0051020	GTPase binding	GO_REF:0000107	IEA	molecular_function	taxon:9823	20230703
A0A8I8C3K7	HSP90AA1	GO:0097110	scaffold protein binding	GO_REF:0000107	IEA	molecular_function	taxon:9823	20230703
A0A8I8C3K7	HSP90AA1	GO:0005524	ATP binding	GO_REF:0000043	IEA	molecular_function	taxon:9823	20230703
A0A8I8C3K7	HSP90AA1	GO:1990782	protein tyrosine kinase binding	GO_REF:0000107	IEA	molecular_function	taxon:9823	20230703
A0A8I8C3K7	HSP90AA1	GO:0016887	ATP hydrolysis activity	GO_REF:0000002	IEA	molecular_function	taxon:9823	20230703
A0A8I8C3K7	HSP90AA1	GO:0051897	positive regulation of protein kinase B signaling	GO_REF:0000107	IEA	biological_process	taxon:9823	20230703
A0A8I8C3K7	HSP90AA1	GO:0005654	nucleoplasm	GO_REF:0000107	IEA	cellular_component	taxon:9823	20230703
A0A8I8C3K7	HSP90AA1	GO:0048675	axon extension	GO_REF:0000107	IEA	biological_process	taxon:9823	20230703
A0A8I8C3K7	HSP90AA1	GO:0030911	TPR domain binding	GO_REF:0000107	IEA	molecular_function	taxon:9823	20230703
A0A8I8C3K7	HSP90AA1	GO:0005524	ATP binding	GO_REF:0000107	IEA	molecular_function	taxon:9823	20230703
A0A8I8C3K7	HSP90AA1	GO:0002218	activation of innate immune response	GO_REF:0000107	IEA	biological_process	taxon:9823	20230703
A0A8I8C3K7	HSP90AA1	GO:0032273	positive regulation of protein polymerization	GO_REF:0000107	IEA	biological_process	taxon:9823	20230703
A0A8I8C3K7	HSP90AA1	GO:0044295	axonal growth cone	GO_REF:0000107	IEA	cellular_component	taxon:9823	20230703
A0A8I8C3K7	HSP90AA1	GO:0097718	disordered domain specific binding	GO_REF:0000107	IEA	molecular_function	taxon:9823	20230703
A0A8I8C3K7	HSP90AA1	GO:0000166	nucleotide binding	GO_REF:0000043	IEA	molecular_function	taxon:9823	20230703
A0A8I8C3K7	HSP90AA1	GO:0033138	positive regulation of peptidyl-serine phosphorylation	GO_REF:0000107	IEA	biological_process	taxon:9823	20230703
A0A8I8C3K7	HSP90AA1	GO:0021955	central nervous system neuron axonogenesis	GO_REF:0000107	IEA	biological_process	taxon:9823	20230703
A0A8I8C3K7	HSP90AA1	GO:0140662	ATP-dependent protein folding chaperone	GO_REF:0000002	IEA	molecular_function	taxon:9823	20230703
A0A8I8C3K7	HSP90AA1	GO:0043025	neuronal cell body	GO_REF:0000107	IEA	cellular_component	taxon:9823	20230703
A0A8I8C3K7	HSP90AA1	GO:0051082	unfolded protein binding	GO_REF:0000002	IEA	molecular_function	taxon:9823	20230703
A0A8I8C3K7	HSP90AA1	GO:0042803	protein homodimerization activity	GO_REF:0000107	IEA	molecular_function	taxon:9823	20230703
A0A8I8C3K7	HSP90AA1	GO:0045732	positive regulation of protein catabolic process	GO_REF:0000107	IEA	biological_process	taxon:9823	20230703
A0A8I8C3K7	HSP90AA1	GO:0070182	DNA polymerase binding	GO_REF:0000107	IEA	molecular_function	taxon:9823	20230703
A0A8I8C3K7	HSP90AA1	GO:0030235	nitric-oxide synthase regulator activity	GO_REF:0000107	IEA	molecular_function	taxon:9823	20230703
A0A8I8C3K7	HSP90AA1	GO:0048156	tau protein binding	GO_REF:0000107	IEA	molecular_function	taxon:9823	20230703
A0A8I8C3K7	HSP90AA1	GO:0001934	positive regulation of protein phosphorylation	GO_REF:0000107	IEA	biological_process	taxon:9823	20230703
A0A4X1V8T4	H1-0	GO:0016604	nuclear body	GO_REF:0000107	IEA	cellular_component	taxon:9823	20230703
A0A4X1V8T4	H1-0	GO:0000786	nucleosome	GO_REF:0000002	IEA	cellular_component	taxon:9823	20230703
A0A4X1V8T4	H1-0	GO:0003677	DNA binding	GO_REF:0000002	IEA	molecular_function	taxon:9823	20230703
A0A4X1V8T4	H1-0	GO:0005654	nucleoplasm	GO_REF:0000107	IEA	cellular_component	taxon:9823	20230703
A0A4X1V8T4	H1-0	GO:0003690	double-stranded DNA binding	GO_REF:0000107	IEA	molecular_function	taxon:9823	20230703
A0A4X1V8T4	H1-0	GO:0031492	nucleosomal DNA binding	PMID:21873635	IBA	molecular_function	taxon:9823	20180503
A0A4X1V8T4	H1-0	GO:0017053	transcription repressor complex	GO_REF:0000107	IEA	cellular_component	taxon:9823	20230703
A0A4X1V8T4	H1-0	GO:0030527	structural constituent of chromatin	GO_REF:0000002	IEA	molecular_function	taxon:9823	20230703
A0A4X1V8T4	H1-0	GO:0005634	nucleus	PMID:21873635	IBA	cellular_component	taxon:9823	20221007
A0A4X1V8T4	H1-0	GO:0006334	nucleosome assembly	GO_REF:0000002	IEA	biological_process	taxon:9823	20230703
A0A4X1V8T4	H1-0	GO:0005794	Golgi apparatus	GO_REF:0000107	IEA	cellular_component	taxon:9823	20230703
A0A4X1V8T4	H1-0	GO:0000785	chromatin	GO_REF:0000107	IEA	cellular_component	taxon:9823	20230703
A0A4X1V8T4	H1-0	GO:0005634	nucleus	GO_REF:0000043	IEA	cellular_component	taxon:9823	20230703
A0A4X1V8T4	H1-0	GO:0031507	heterochromatin formation	GO_REF:0000107	IEA	biological_process	taxon:9823	20230703
A0A4X1V8T4	H1-0	GO:0030261	chromosome condensation	PMID:21873635	IBA	biological_process	taxon:9823	20180503
A0A4X1V8T4	H1-0	GO:0005694	chromosome	GO_REF:0000043	IEA	cellular_component	taxon:9823	20230703
A0A4X1V8T4	H1-0	GO:0003680	minor groove of adenine-thymine-rich DNA binding	GO_REF:0000107	IEA	molecular_function	taxon:9823	20230703
A0A4X1V8T4	H1-0	GO:0005634	nucleus	GO_REF:0000044	IEA	cellular_component	taxon:9823	20230703
A0A4X1V8T4	H1-0	GO:0000791	euchromatin	GO_REF:0000107	IEA	cellular_component	taxon:9823	20230703
A0A4X1V8T4	H1-0	GO:0015629	actin cytoskeleton	GO_REF:0000107	IEA	cellular_component	taxon:9823	20230703
A0A4X1V8T4	H1-0	GO:0031490	chromatin DNA binding	GO_REF:0000107	IEA	molecular_function	taxon:9823	20230703
A0A4X1V8T4	H1-0	GO:0003690	double-stranded DNA binding	PMID:21873635	IBA	molecular_function	taxon:9823	20180503
A0A4X1V8T4	H1-0	GO:0003677	DNA binding	GO_REF:0000043	IEA	molecular_function	taxon:9823	20230703
A0A4X1V8T4	H1-0	GO:0005634	nucleus	GO_REF:0000107	IEA	cellular_component	taxon:9823	20230703
A0A4X1V8T4	H1-0	GO:0045910	negative regulation of DNA recombination	PMID:21873635	IBA	biological_process	taxon:9823	20180503
A0A8D0QWF0	A0A8D0QWF0	GO:0005840	ribosome	GO_REF:0000043	IEA	cellular_component	taxon:9823	20230703
A0A8D0QWF0	A0A8D0QWF0	GO:1990904	ribonucleoprotein complex	GO_REF:0000043	IEA	cellular_component	taxon:9823	20230703
F1SJ93	RCN2	GO:0005783	endoplasmic reticulum	GO_REF:0000107	IEA	cellular_component	taxon:9823	20230703
F1SJ93	RCN2	GO:0005730	nucleolus	GO_REF:0000107	IEA	cellular_component	taxon:9823	20230703
F1SJ93	RCN2	GO:0005509	calcium ion binding	PMID:21873635	IBA	molecular_function	taxon:9823	20180308
F1SJ93	RCN2	GO:0005509	calcium ion binding	GO_REF:0000002	IEA	molecular_function	taxon:9823	20230703
F1SJ93	RCN2	GO:0046872	metal ion binding	GO_REF:0000043	IEA	molecular_function	taxon:9823	20230703
F1SJ93	RCN2	GO:0005783	endoplasmic reticulum	PMID:21873635	IBA	cellular_component	taxon:9823	20220413
A0A480X841	RAB2A	GO:0005525	GTP binding	GO_REF:0000002	IEA	molecular_function	taxon:9823	20230703
A0A480X841	RAB2A	GO:0003924	GTPase activity	GO_REF:0000002	IEA	molecular_function	taxon:9823	20230703
A0A8W4FIN5	USP14	GO:0016787	hydrolase activity	GO_REF:0000043	IEA	molecular_function	taxon:9823	20230703
A0A8W4FIN5	USP14	GO:0006508	proteolysis	GO_REF:0000043	IEA	biological_process	taxon:9823	20230703
A0A8W4FIN5	USP14	GO:0000502	proteasome complex	GO_REF:0000043	IEA	cellular_component	taxon:9823	20230703
A0A8W4FIN5	USP14	GO:0043161	proteasome-mediated ubiquitin-dependent protein catabolic process	GO_REF:0000002	IEA	biological_process	taxon:9823	20230703
A0A8W4FIN5	USP14	GO:0008233	peptidase activity	GO_REF:0000043	IEA	molecular_function	taxon:9823	20230703
A0A8W4FIN5	USP14	GO:0008234	cysteine-type peptidase activity	GO_REF:0000043	IEA	molecular_function	taxon:9823	20230703
A0A8W4FIN5	USP14	GO:0004843	cysteine-type deubiquitinase activity	GO_REF:0000002	IEA	molecular_function	taxon:9823	20230703
A0A8X9AEL6	COL1A2	GO:0002376	immune system process	GO_REF:0000043	IEA	biological_process	taxon:9823	20230703
A0A8X9AEL6	COL1A2	GO:0045087	innate immune response	GO_REF:0000043	IEA	biological_process	taxon:9823	20230703
A0A8X9AEL6	COL1A2	GO:0005201	extracellular matrix structural constituent	GO_REF:0000002	IEA	molecular_function	taxon:9823	20230703
Q06AS7	Q06AS7	GO:0003924	GTPase activity	GO_REF:0000002	IEA	molecular_function	taxon:9823	20230703
Q06AS7	Q06AS7	GO:0110165	cellular anatomical entity	GO_REF:0000117	IEA	cellular_component	taxon:9823	20230703
Q06AS7	Q06AS7	GO:0000166	nucleotide binding	GO_REF:0000043	IEA	molecular_function	taxon:9823	20230703
Q06AS7	Q06AS7	GO:0007186	G protein-coupled receptor signaling pathway	GO_REF:0000002	IEA	biological_process	taxon:9823	20230703
Q06AS7	Q06AS7	GO:0031683	G-protein beta/gamma-subunit complex binding	GO_REF:0000002	IEA	molecular_function	taxon:9823	20230703
Q06AS7	Q06AS7	GO:0005525	GTP binding	GO_REF:0000002	IEA	molecular_function	taxon:9823	20230703
Q06AS7	Q06AS7	GO:0007165	signal transduction	GO_REF:0000002	IEA	biological_process	taxon:9823	20230703
Q06AS7	Q06AS7	GO:0005525	GTP binding	GO_REF:0000043	IEA	molecular_function	taxon:9823	20230703
Q06AS7	Q06AS7	GO:0019001	guanyl nucleotide binding	GO_REF:0000002	IEA	molecular_function	taxon:9823	20230703
Q06AS7	Q06AS7	GO:0007188	adenylate cyclase-modulating G protein-coupled receptor signaling pathway	GO_REF:0000002	IEA	biological_process	taxon:9823	20230703
Q06AS7	Q06AS7	GO:0007165	signal transduction	GO_REF:0000043	IEA	biological_process	taxon:9823	20230703
A0A8D2BGV8	A0A8D2BGV8	GO:0005856	cytoskeleton	GO_REF:0000002	IEA	cellular_component	taxon:9823	20230703
A0A8D2BGV8	A0A8D2BGV8	GO:0008092	cytoskeletal protein binding	GO_REF:0000002	IEA	molecular_function	taxon:9823	20230703
A0A8D2BGV8	A0A8D2BGV8	GO:0005198	structural molecule activity	GO_REF:0000002	IEA	molecular_function	taxon:9823	20230703
A0A8D2BGV8	A0A8D2BGV8	GO:0003779	actin binding	GO_REF:0000002	IEA	molecular_function	taxon:9823	20230703
A0A8D2BGV8	A0A8D2BGV8	GO:0030866	cortical actin cytoskeleton organization	GO_REF:0000002	IEA	biological_process	taxon:9823	20230703
A0A8D1MDZ1	GSS	GO:0004363	glutathione synthase activity	GO_REF:0000104	IEA	molecular_function	taxon:9823	20230703
A0A8D1MDZ1	GSS	GO:0005524	ATP binding	GO_REF:0000043	IEA	molecular_function	taxon:9823	20230703
A0A8D1MDZ1	GSS	GO:0016874	ligase activity	GO_REF:0000043	IEA	molecular_function	taxon:9823	20230703
A0A8D1MDZ1	GSS	GO:0004363	glutathione synthase activity	GO_REF:0000002	IEA	molecular_function	taxon:9823	20230703
A0A8D1MDZ1	GSS	GO:0043295	glutathione binding	GO_REF:0000104	IEA	molecular_function	taxon:9823	20230703
A0A8D1MDZ1	GSS	GO:0000287	magnesium ion binding	GO_REF:0000104	IEA	molecular_function	taxon:9823	20230703
A0A8D1MDZ1	GSS	GO:1901564	organonitrogen compound metabolic process	GO_REF:0000117	IEA	biological_process	taxon:9823	20230703
A0A8D1MDZ1	GSS	GO:0005524	ATP binding	GO_REF:0000104	IEA	molecular_function	taxon:9823	20230703
A0A8D1MDZ1	GSS	GO:0006750	glutathione biosynthetic process	GO_REF:0000002	IEA	biological_process	taxon:9823	20230703
A0A8D1MDZ1	GSS	GO:0005524	ATP binding	GO_REF:0000002	IEA	molecular_function	taxon:9823	20230703
A0A8D1MDZ1	GSS	GO:0000166	nucleotide binding	GO_REF:0000043	IEA	molecular_function	taxon:9823	20230703
A0A8D1MDZ1	GSS	GO:0046872	metal ion binding	GO_REF:0000043	IEA	molecular_function	taxon:9823	20230703
A0A8D1MDZ1	GSS	GO:0006750	glutathione biosynthetic process	GO_REF:0000041	IEA	biological_process	taxon:9823	20230703
A0A8D1MDZ1	GSS	GO:0006750	glutathione biosynthetic process	GO_REF:0000043	IEA	biological_process	taxon:9823	20230703
A0A8D1MDZ1	GSS	GO:0016874	ligase activity	GO_REF:0000002	IEA	molecular_function	taxon:9823	20230703
Q8MJ30	QDPR	GO:0070404	NADH binding	PMID:21873635	IBA	molecular_function	taxon:9823	20171222
Q8MJ30	QDPR	GO:0016616	oxidoreductase activity, acting on the CH-OH group of donors, NAD or NADP as acceptor	GO_REF:0000117	IEA	molecular_function	taxon:9823	20230703
Q8MJ30	QDPR	GO:0006729	tetrahydrobiopterin biosynthetic process	PMID:21873635	IBA	biological_process	taxon:9823	20171222
Q8MJ30	QDPR	GO:0004155	6,7-dihydropteridine reductase activity	PMID:21873635	IBA	molecular_function	taxon:9823	20220414
Q8MJ30	QDPR	GO:0004155	6,7-dihydropteridine reductase activity	GO_REF:0000003	IEA	molecular_function	taxon:9823	20230703
Q8MJ30	QDPR	GO:0006559	L-phenylalanine catabolic process	PMID:21873635	IBA	biological_process	taxon:9823	20171222
Q8MJ30	QDPR	GO:0006729	tetrahydrobiopterin biosynthetic process	GO_REF:0000024	ISS	biological_process	taxon:9823	20080311
Q8MJ30	QDPR	GO:0016491	oxidoreductase activity	GO_REF:0000043	IEA	molecular_function	taxon:9823	20230703
Q8MJ30	QDPR	GO:0004155	6,7-dihydropteridine reductase activity	GO_REF:0000024	ISS	molecular_function	taxon:9823	20080311
Q8MJ30	QDPR	GO:0004155	6,7-dihydropteridine reductase activity	GO_REF:0000024	ISS	molecular_function	taxon:9823	20220106
Q8MJ30	QDPR	GO:0006729	tetrahydrobiopterin biosynthetic process	GO_REF:0000043	IEA	biological_process	taxon:9823	20230703
Q8MJ30	QDPR	GO:0005737	cytoplasm	PMID:21873635	IBA	cellular_component	taxon:9823	20230603
Q8MJ30	QDPR	GO:0016491	oxidoreductase activity	GO_REF:0000002	IEA	molecular_function	taxon:9823	20230703
Q8MJ30	QDPR	GO:0005575	cellular_component	GO_REF:0000015	ND	cellular_component	taxon:9823	20080311
Q8MJ30	QDPR	GO:0070402	NADPH binding	PMID:21873635	IBA	molecular_function	taxon:9823	20171222
M5AYF7	ROCK2	GO:0016301	kinase activity	GO_REF:0000043	IEA	molecular_function	taxon:9823	20230703
M5AYF7	ROCK2	GO:0016310	phosphorylation	GO_REF:0000043	IEA	biological_process	taxon:9823	20230703
M5AYF7	ROCK2	GO:0046872	metal ion binding	GO_REF:0000043	IEA	molecular_function	taxon:9823	20230703
A0A8D0ZE23	A0A8D0ZE23	GO:0051260	protein homooligomerization	GO_REF:0000002	IEA	biological_process	taxon:9823	20230703
A0A8D1S183	A0A8D1S183	GO:0005737	cytoplasm	GO_REF:0000043	IEA	cellular_component	taxon:9823	20230703
A0A8D1S183	A0A8D1S183	GO:0006886	intracellular protein transport	GO_REF:0000002	IEA	biological_process	taxon:9823	20230703
A0A8D1S183	A0A8D1S183	GO:0005794	Golgi apparatus	GO_REF:0000043	IEA	cellular_component	taxon:9823	20230703
A0A8D1S183	A0A8D1S183	GO:0030117	membrane coat	GO_REF:0000002	IEA	cellular_component	taxon:9823	20230703
A0A8D1S183	A0A8D1S183	GO:0005737	cytoplasm	GO_REF:0000044	IEA	cellular_component	taxon:9823	20230703
A0A8D1S183	A0A8D1S183	GO:0030126	COPI vesicle coat	GO_REF:0000002	IEA	cellular_component	taxon:9823	20230703
A0A8D1S183	A0A8D1S183	GO:0016020	membrane	GO_REF:0000043	IEA	cellular_component	taxon:9823	20230703
A0A8D1S183	A0A8D1S183	GO:0015031	protein transport	GO_REF:0000043	IEA	biological_process	taxon:9823	20230703
A0A8D1S183	A0A8D1S183	GO:0031410	cytoplasmic vesicle	GO_REF:0000043	IEA	cellular_component	taxon:9823	20230703
A0A8D1S183	A0A8D1S183	GO:0005198	structural molecule activity	GO_REF:0000002	IEA	molecular_function	taxon:9823	20230703
A0A8D1S183	A0A8D1S183	GO:0030663	COPI-coated vesicle membrane	GO_REF:0000044	IEA	cellular_component	taxon:9823	20230703
A0A8D1S183	A0A8D1S183	GO:0000139	Golgi membrane	GO_REF:0000044	IEA	cellular_component	taxon:9823	20230703
A0A8D1S183	A0A8D1S183	GO:0005793	endoplasmic reticulum-Golgi intermediate compartment	GO_REF:0000044	IEA	cellular_component	taxon:9823	20230703
A0A8D1S183	A0A8D1S183	GO:0005737	cytoplasm	GO_REF:0000002	IEA	cellular_component	taxon:9823	20230703
A0A8D1S183	A0A8D1S183	GO:0016192	vesicle-mediated transport	GO_REF:0000002	IEA	biological_process	taxon:9823	20230703
A0A8D1S183	A0A8D1S183	GO:0016192	vesicle-mediated transport	GO_REF:0000043	IEA	biological_process	taxon:9823	20230703
A0A8D1S183	A0A8D1S183	GO:0016020	membrane	GO_REF:0000044	IEA	cellular_component	taxon:9823	20230703
A0A8D1U5L1	VCAN	GO:0005540	hyaluronic acid binding	GO_REF:0000002	IEA	molecular_function	taxon:9823	20230703
A0A8D1U5L1	VCAN	GO:0005576	extracellular region	GO_REF:0000043	IEA	cellular_component	taxon:9823	20230703
A0A8D1U5L1	VCAN	GO:0110165	cellular anatomical entity	GO_REF:0000117	IEA	cellular_component	taxon:9823	20230703
A0A8D1U5L1	VCAN	GO:0007155	cell adhesion	GO_REF:0000002	IEA	biological_process	taxon:9823	20230703
A0A8D1U5L1	VCAN	GO:0005509	calcium ion binding	GO_REF:0000002	IEA	molecular_function	taxon:9823	20230703
A0A8D1U5L1	VCAN	GO:0030246	carbohydrate binding	GO_REF:0000043	IEA	molecular_function	taxon:9823	20230703
A0A481B6Q9	A0A481B6Q9	GO:0005975	carbohydrate metabolic process	GO_REF:0000002	IEA	biological_process	taxon:9823	20230703
A0A481B6Q9	A0A481B6Q9	GO:0031179	peptide modification	GO_REF:0000002	IEA	biological_process	taxon:9823	20230703
A0A8D1CG24	COL9A2	GO:0002376	immune system process	GO_REF:0000043	IEA	biological_process	taxon:9823	20230703
A0A8D1CG24	COL9A2	GO:0045087	innate immune response	GO_REF:0000043	IEA	biological_process	taxon:9823	20230703
A0A8D0JMT5	A0A8D0JMT5	GO:0005840	ribosome	GO_REF:0000043	IEA	cellular_component	taxon:9823	20230703
A0A8D0JMT5	A0A8D0JMT5	GO:0006412	translation	GO_REF:0000002	IEA	biological_process	taxon:9823	20230703
A0A8D0JMT5	A0A8D0JMT5	GO:0003735	structural constituent of ribosome	GO_REF:0000002	IEA	molecular_function	taxon:9823	20230703
A0A8D0JMT5	A0A8D0JMT5	GO:1990904	ribonucleoprotein complex	GO_REF:0000043	IEA	cellular_component	taxon:9823	20230703
A0A8D0JMT5	A0A8D0JMT5	GO:0005840	ribosome	GO_REF:0000002	IEA	cellular_component	taxon:9823	20230703
A0A8W4FMS9	GNB1	GO:0007165	signal transduction	GO_REF:0000002	IEA	biological_process	taxon:9823	20230703
A0A8W4FMS9	GNB1	GO:0007165	signal transduction	GO_REF:0000043	IEA	biological_process	taxon:9823	20230703
A0A4X1VBM4	MATR3	GO:0003281	ventricular septum development	GO_REF:0000107	IEA	biological_process	taxon:9823	20230703
A0A4X1VBM4	MATR3	GO:0003723	RNA binding	GO_REF:0000104	IEA	molecular_function	taxon:9823	20230703
A0A4X1VBM4	MATR3	GO:0042802	identical protein binding	GO_REF:0000107	IEA	molecular_function	taxon:9823	20230703
A0A4X1VBM4	MATR3	GO:0005634	nucleus	GO_REF:0000043	IEA	cellular_component	taxon:9823	20230703
A0A4X1VBM4	MATR3	GO:0003723	RNA binding	GO_REF:0000002	IEA	molecular_function	taxon:9823	20230703
A0A4X1VBM4	MATR3	GO:0003723	RNA binding	GO_REF:0000043	IEA	molecular_function	taxon:9823	20230703
A0A4X1VBM4	MATR3	GO:0008270	zinc ion binding	GO_REF:0000002	IEA	molecular_function	taxon:9823	20230703
A0A4X1VBM4	MATR3	GO:0005634	nucleus	GO_REF:0000002	IEA	cellular_component	taxon:9823	20230703
A0A4X1VBM4	MATR3	GO:0001825	blastocyst formation	GO_REF:0000107	IEA	biological_process	taxon:9823	20230703
A0A4X1VBM4	MATR3	GO:0002218	activation of innate immune response	GO_REF:0000107	IEA	biological_process	taxon:9823	20230703
A0A4X1VBM4	MATR3	GO:0035198	miRNA binding	GO_REF:0000107	IEA	molecular_function	taxon:9823	20230703
A0A4X1VBM4	MATR3	GO:0003170	heart valve development	GO_REF:0000107	IEA	biological_process	taxon:9823	20230703
A0A4X1VBM4	MATR3	GO:0046872	metal ion binding	GO_REF:0000043	IEA	molecular_function	taxon:9823	20230703
A0A4X1VBM4	MATR3	GO:0003676	nucleic acid binding	GO_REF:0000002	IEA	molecular_function	taxon:9823	20230703
A0A4X1VBM4	MATR3	GO:0005634	nucleus	GO_REF:0000107	IEA	cellular_component	taxon:9823	20230703
A0A4X1VBM4	MATR3	GO:0043229	intracellular organelle	GO_REF:0000117	IEA	cellular_component	taxon:9823	20230703
A0A4X1VBM4	MATR3	GO:0010608	post-transcriptional regulation of gene expression	GO_REF:0000107	IEA	biological_process	taxon:9823	20230703
A0A4X1UED9	A0A4X1UED9	GO:0005524	ATP binding	GO_REF:0000002	IEA	molecular_function	taxon:9823	20230703
A0A4X1UED9	A0A4X1UED9	GO:0000166	nucleotide binding	GO_REF:0000043	IEA	molecular_function	taxon:9823	20230703
A0A4X1UED9	A0A4X1UED9	GO:0005524	ATP binding	GO_REF:0000043	IEA	molecular_function	taxon:9823	20230703
A0A4X1UED9	A0A4X1UED9	GO:0140662	ATP-dependent protein folding chaperone	GO_REF:0000002	IEA	molecular_function	taxon:9823	20230703
A0A4X1UED9	A0A4X1UED9	GO:0006457	protein folding	GO_REF:0000108	IEA	biological_process	taxon:9823	20230705
A0A8W4FDJ4	ERH	GO:0007049	cell cycle	GO_REF:0000043	IEA	biological_process	taxon:9823	20230703
A0A4X1T1U4	PSMC5	GO:0031090	organelle membrane	GO_REF:0000117	IEA	cellular_component	taxon:9823	20230703
A0A4X1T1U4	PSMC5	GO:0016887	ATP hydrolysis activity	GO_REF:0000002	IEA	molecular_function	taxon:9823	20230703
A0A4X1T1U4	PSMC5	GO:0005524	ATP binding	GO_REF:0000043	IEA	molecular_function	taxon:9823	20230703
A0A4X1T1U4	PSMC5	GO:0000502	proteasome complex	GO_REF:0000043	IEA	cellular_component	taxon:9823	20230703
A0A4X1T1U4	PSMC5	GO:0005524	ATP binding	GO_REF:0000002	IEA	molecular_function	taxon:9823	20230703
A0A4X1T1U4	PSMC5	GO:0000166	nucleotide binding	GO_REF:0000043	IEA	molecular_function	taxon:9823	20230703
A0A8D1YJM6	A0A8D1YJM6	GO:0005783	endoplasmic reticulum	GO_REF:0000043	IEA	cellular_component	taxon:9823	20230703
A0A8D1YJM6	A0A8D1YJM6	GO:0006457	protein folding	GO_REF:0000002	IEA	biological_process	taxon:9823	20230703
A0A8D1YJM6	A0A8D1YJM6	GO:0005783	endoplasmic reticulum	GO_REF:0000044	IEA	cellular_component	taxon:9823	20230703
A0A5G2QXQ8	PPT1	GO:0098599	palmitoyl hydrolase activity	GO_REF:0000002	IEA	molecular_function	taxon:9823	20230703
A0A5G2QXQ8	PPT1	GO:0098734	macromolecule depalmitoylation	GO_REF:0000108	IEA	biological_process	taxon:9823	20230705
A0A5G2QXQ8	PPT1	GO:0008474	palmitoyl-(protein) hydrolase activity	GO_REF:0000003	IEA	molecular_function	taxon:9823	20230703
A0A5G2QXQ8	PPT1	GO:0016787	hydrolase activity	GO_REF:0000043	IEA	molecular_function	taxon:9823	20230703
A0A4X1VSR0	A0A4X1VSR0	GO:0016491	oxidoreductase activity	GO_REF:0000043	IEA	molecular_function	taxon:9823	20230703
A0A4X1VSR0	A0A4X1VSR0	GO:0004362	glutathione-disulfide reductase (NADPH) activity	GO_REF:0000003	IEA	molecular_function	taxon:9823	20230703
A0A4X1VSR0	A0A4X1VSR0	GO:0016491	oxidoreductase activity	GO_REF:0000002	IEA	molecular_function	taxon:9823	20230703
A0A4X1VSR0	A0A4X1VSR0	GO:0016668	oxidoreductase activity, acting on a sulfur group of donors, NAD(P) as acceptor	GO_REF:0000002	IEA	molecular_function	taxon:9823	20230703
A0A4X1VSR0	A0A4X1VSR0	GO:0045454	cell redox homeostasis	GO_REF:0000002	IEA	biological_process	taxon:9823	20230703
A0A4X1VSR0	A0A4X1VSR0	GO:0050660	flavin adenine dinucleotide binding	GO_REF:0000002	IEA	molecular_function	taxon:9823	20230703
A0A4X1VSR0	A0A4X1VSR0	GO:0000166	nucleotide binding	GO_REF:0000043	IEA	molecular_function	taxon:9823	20230703
A0A4X1VSR0	A0A4X1VSR0	GO:0098869	cellular oxidant detoxification	GO_REF:0000108	IEA	biological_process	taxon:9823	20230705
I3LEE6	PCOLCE	GO:0005518	collagen binding	PMID:21873635	IBA	molecular_function	taxon:9823	20211209
I3LEE6	PCOLCE	GO:0005576	extracellular region	GO_REF:0000044	IEA	cellular_component	taxon:9823	20230703
I3LEE6	PCOLCE	GO:0016504	peptidase activator activity	PMID:21873635	IBA	molecular_function	taxon:9823	20211209
I3LEE6	PCOLCE	GO:0008201	heparin binding	GO_REF:0000107	IEA	molecular_function	taxon:9823	20230703
I3LEE6	PCOLCE	GO:0016504	peptidase activator activity	GO_REF:0000107	IEA	molecular_function	taxon:9823	20230703
I3LEE6	PCOLCE	GO:0005576	extracellular region	GO_REF:0000043	IEA	cellular_component	taxon:9823	20230703
I3LEE6	PCOLCE	GO:0006508	proteolysis	PMID:21873635	IBA	biological_process	taxon:9823	20211209
I3LEE6	PCOLCE	GO:0005518	collagen binding	GO_REF:0000107	IEA	molecular_function	taxon:9823	20230703
P01965	HBA	GO:0020037	heme binding	PMID:21873635	IBA	molecular_function	taxon:9823	20180413
P01965	HBA	GO:0015671	oxygen transport	GO_REF:0000002	IEA	biological_process	taxon:9823	20230703
P01965	HBA	GO:0020037	heme binding	GO_REF:0000002	IEA	molecular_function	taxon:9823	20230703
P01965	HBA	GO:0043177	organic acid binding	PMID:21873635	IBA	molecular_function	taxon:9823	20180413
P01965	HBA	GO:0005515	protein binding	PMID:12072504	IPI	molecular_function	taxon:9823	20070917
P01965	HBA	GO:0005344	oxygen carrier activity	GO_REF:0000043	IEA	molecular_function	taxon:9823	20230703
P01965	HBA	GO:0019825	oxygen binding	GO_REF:0000002	IEA	molecular_function	taxon:9823	20230703
P01965	HBA	GO:0005833	hemoglobin complex	GO_REF:0000002	IEA	cellular_component	taxon:9823	20230703
P01965	HBA	GO:0005833	hemoglobin complex	PMID:21873635	IBA	cellular_component	taxon:9823	20230110
P01965	HBA	GO:0019825	oxygen binding	PMID:21873635	IBA	molecular_function	taxon:9823	20230110
P01965	HBA	GO:0031838	haptoglobin-hemoglobin complex	PMID:21873635	IBA	cellular_component	taxon:9823	20180413
P01965	HBA	GO:0004601	peroxidase activity	PMID:21873635	IBA	molecular_function	taxon:9823	20180413
P01965	HBA	GO:0046872	metal ion binding	GO_REF:0000043	IEA	molecular_function	taxon:9823	20230703
P01965	HBA	GO:0031720	haptoglobin binding	PMID:21873635	IBA	molecular_function	taxon:9823	20180413
P01965	HBA	GO:0005506	iron ion binding	GO_REF:0000002	IEA	molecular_function	taxon:9823	20230703
P01965	HBA	GO:0015671	oxygen transport	GO_REF:0000043	IEA	biological_process	taxon:9823	20230703
P01965	HBA	GO:0042744	hydrogen peroxide catabolic process	PMID:21873635	IBA	biological_process	taxon:9823	20180413
P01965	HBA	GO:0098869	cellular oxidant detoxification	GO_REF:0000108	IEA	biological_process	taxon:9823	20230705
P01965	HBA	GO:0005344	oxygen carrier activity	PMID:21873635	IBA	molecular_function	taxon:9823	20230405
A0A8D0WV46	A0A8D0WV46	GO:0006826	iron ion transport	GO_REF:0000002	IEA	biological_process	taxon:9823	20230703
A0A8D0WV46	A0A8D0WV46	GO:0005576	extracellular region	GO_REF:0000044	IEA	cellular_component	taxon:9823	20230703
A0A8D0WV46	A0A8D0WV46	GO:0034755	iron ion transmembrane transport	GO_REF:0000043	IEA	biological_process	taxon:9823	20230703
A0A8D0WV46	A0A8D0WV46	GO:0006879	intracellular iron ion homeostasis	GO_REF:0000002	IEA	biological_process	taxon:9823	20230703
A0A8D0WV46	A0A8D0WV46	GO:0046872	metal ion binding	GO_REF:0000043	IEA	molecular_function	taxon:9823	20230703
A0A8D0WV46	A0A8D0WV46	GO:0006811	monoatomic ion transport	GO_REF:0000043	IEA	biological_process	taxon:9823	20230703
A0A8D0WV46	A0A8D0WV46	GO:0005615	extracellular space	GO_REF:0000002	IEA	cellular_component	taxon:9823	20230703
A0A8D0WV46	A0A8D0WV46	GO:0008199	ferric iron binding	GO_REF:0000002	IEA	molecular_function	taxon:9823	20230703
A0A8D0WV46	A0A8D0WV46	GO:0005576	extracellular region	GO_REF:0000002	IEA	cellular_component	taxon:9823	20230703
I3LAB6	PSMA2	GO:0006511	ubiquitin-dependent protein catabolic process	GO_REF:0000002	IEA	biological_process	taxon:9823	20230703
I3LAB6	PSMA2	GO:0051603	proteolysis involved in protein catabolic process	GO_REF:0000002	IEA	biological_process	taxon:9823	20230703
I3LAB6	PSMA2	GO:0019773	proteasome core complex, alpha-subunit complex	GO_REF:0000002	IEA	cellular_component	taxon:9823	20230703
I3LAB6	PSMA2	GO:0005737	cytoplasm	GO_REF:0000043	IEA	cellular_component	taxon:9823	20230703
I3LAB6	PSMA2	GO:0005634	nucleus	GO_REF:0000044	IEA	cellular_component	taxon:9823	20230703
I3LAB6	PSMA2	GO:0019773	proteasome core complex, alpha-subunit complex	GO_REF:0000104	IEA	cellular_component	taxon:9823	20230703
I3LAB6	PSMA2	GO:0005737	cytoplasm	GO_REF:0000044	IEA	cellular_component	taxon:9823	20230703
I3LAB6	PSMA2	GO:0000502	proteasome complex	GO_REF:0000043	IEA	cellular_component	taxon:9823	20230703
I3LAB6	PSMA2	GO:0005634	nucleus	GO_REF:0000043	IEA	cellular_component	taxon:9823	20230703
I3LAB6	PSMA2	GO:0005839	proteasome core complex	GO_REF:0000002	IEA	cellular_component	taxon:9823	20230703
A0A4X1UTP2	CHAD	GO:0005615	extracellular space	PMID:21873635	IBA	cellular_component	taxon:9823	20210102
A0A4X1UTP2	CHAD	GO:0031012	extracellular matrix	PMID:21873635	IBA	cellular_component	taxon:9823	20200930
A0A4X1UTP2	CHAD	GO:1900155	negative regulation of bone trabecula formation	GO_REF:0000107	IEA	biological_process	taxon:9823	20230703
A0A4X1UTP2	CHAD	GO:0060348	bone development	GO_REF:0000107	IEA	biological_process	taxon:9823	20230703
A0A8D1QW04	A0A8D1QW04	GO:0032259	methylation	GO_REF:0000043	IEA	biological_process	taxon:9823	20230703
A0A8D1QW04	A0A8D1QW04	GO:0008168	methyltransferase activity	GO_REF:0000002	IEA	molecular_function	taxon:9823	20230703
A0A8D1QW04	A0A8D1QW04	GO:0008757	S-adenosylmethionine-dependent methyltransferase activity	GO_REF:0000002	IEA	molecular_function	taxon:9823	20230703
A0A8D1QW04	A0A8D1QW04	GO:0008168	methyltransferase activity	GO_REF:0000043	IEA	molecular_function	taxon:9823	20230703
A0A8D1QW04	A0A8D1QW04	GO:0016274	protein-arginine N-methyltransferase activity	GO_REF:0000002	IEA	molecular_function	taxon:9823	20230703
A0A8D1QW04	A0A8D1QW04	GO:0016740	transferase activity	GO_REF:0000043	IEA	molecular_function	taxon:9823	20230703
A0A8D1MDR9	A0A8D1MDR9	GO:0005576	extracellular region	GO_REF:0000044	IEA	cellular_component	taxon:9823	20230703
A0A8D1MDR9	A0A8D1MDR9	GO:0007165	signal transduction	GO_REF:0000002	IEA	biological_process	taxon:9823	20230703
A0A8D1MDR9	A0A8D1MDR9	GO:0005576	extracellular region	GO_REF:0000002	IEA	cellular_component	taxon:9823	20230703
A0A4X1UT02	P4HA2	GO:0004656	procollagen-proline 4-dioxygenase activity	GO_REF:0000003	IEA	molecular_function	taxon:9823	20230703
A0A4X1UT02	P4HA2	GO:0016491	oxidoreductase activity	GO_REF:0000043	IEA	molecular_function	taxon:9823	20230703
A0A4X1UT02	P4HA2	GO:0004656	procollagen-proline 4-dioxygenase activity	GO_REF:0000002	IEA	molecular_function	taxon:9823	20230703
A0A4X1UT02	P4HA2	GO:0005783	endoplasmic reticulum	GO_REF:0000117	IEA	cellular_component	taxon:9823	20230703
A0A4X1UT02	P4HA2	GO:0005788	endoplasmic reticulum lumen	GO_REF:0000044	IEA	cellular_component	taxon:9823	20230703
A0A4X1UT02	P4HA2	GO:0005783	endoplasmic reticulum	GO_REF:0000043	IEA	cellular_component	taxon:9823	20230703
A0A4X1UT02	P4HA2	GO:0051213	dioxygenase activity	GO_REF:0000043	IEA	molecular_function	taxon:9823	20230703
A0A4X1UT02	P4HA2	GO:0016705	oxidoreductase activity, acting on paired donors, with incorporation or reduction of molecular oxygen	GO_REF:0000002	IEA	molecular_function	taxon:9823	20230703
A0A4X1UT02	P4HA2	GO:0005506	iron ion binding	GO_REF:0000002	IEA	molecular_function	taxon:9823	20230703
A0A4X1UT02	P4HA2	GO:0031418	L-ascorbic acid binding	GO_REF:0000002	IEA	molecular_function	taxon:9823	20230703
A0A4X1UT02	P4HA2	GO:0005783	endoplasmic reticulum	GO_REF:0000002	IEA	cellular_component	taxon:9823	20230703
A0A4X1UT02	P4HA2	GO:0046872	metal ion binding	GO_REF:0000043	IEA	molecular_function	taxon:9823	20230703
A0A8D1BJ25	DCTN2	GO:0005869	dynactin complex	GO_REF:0000002	IEA	cellular_component	taxon:9823	20230703
A0A8D1BJ25	DCTN2	GO:0030286	dynein complex	GO_REF:0000043	IEA	cellular_component	taxon:9823	20230703
A0A8D1BJ25	DCTN2	GO:0007017	microtubule-based process	GO_REF:0000002	IEA	biological_process	taxon:9823	20230703
A0A8D1BJ25	DCTN2	GO:0005737	cytoplasm	GO_REF:0000043	IEA	cellular_component	taxon:9823	20230703
A0A8D0Q8Y6	DDAH1	GO:0016787	hydrolase activity	GO_REF:0000043	IEA	molecular_function	taxon:9823	20230703
A0A480WZ72	A0A480WZ72	GO:0006572	tyrosine catabolic process	GO_REF:0000104	IEA	biological_process	taxon:9823	20230703
A0A480WZ72	A0A480WZ72	GO:0009072	aromatic amino acid metabolic process	GO_REF:0000002	IEA	biological_process	taxon:9823	20230703
A0A480WZ72	A0A480WZ72	GO:0004334	fumarylacetoacetase activity	GO_REF:0000002	IEA	molecular_function	taxon:9823	20230703
A0A480WZ72	A0A480WZ72	GO:0006559	L-phenylalanine catabolic process	GO_REF:0000104	IEA	biological_process	taxon:9823	20230703
A0A480WZ72	A0A480WZ72	GO:0006572	tyrosine catabolic process	GO_REF:0000043	IEA	biological_process	taxon:9823	20230703
A0A480WZ72	A0A480WZ72	GO:0004334	fumarylacetoacetase activity	GO_REF:0000104	IEA	molecular_function	taxon:9823	20230703
A0A480WZ72	A0A480WZ72	GO:0016787	hydrolase activity	GO_REF:0000043	IEA	molecular_function	taxon:9823	20230703
A0A480WZ72	A0A480WZ72	GO:0046872	metal ion binding	GO_REF:0000043	IEA	molecular_function	taxon:9823	20230703
A0A480WZ72	A0A480WZ72	GO:0006559	L-phenylalanine catabolic process	GO_REF:0000043	IEA	biological_process	taxon:9823	20230703
A0A480WZ72	A0A480WZ72	GO:0003824	catalytic activity	GO_REF:0000002	IEA	molecular_function	taxon:9823	20230703
A0A480WZ72	A0A480WZ72	GO:0006559	L-phenylalanine catabolic process	GO_REF:0000041	IEA	biological_process	taxon:9823	20230703
A0A480WZ72	A0A480WZ72	GO:0046872	metal ion binding	GO_REF:0000104	IEA	molecular_function	taxon:9823	20230703
A0A480WZ72	A0A480WZ72	GO:0004334	fumarylacetoacetase activity	GO_REF:0000003	IEA	molecular_function	taxon:9823	20230703
A0A8D1G0X5	A0A8D1G0X5	GO:0016740	transferase activity	GO_REF:0000043	IEA	molecular_function	taxon:9823	20230703
A0A8D1G0X5	A0A8D1G0X5	GO:0070569	uridylyltransferase activity	GO_REF:0000002	IEA	molecular_function	taxon:9823	20230703
A0A8D0QPS6	A0A8D0QPS6	GO:0016020	membrane	GO_REF:0000043	IEA	cellular_component	taxon:9823	20230703
A0A8D0WIV4	PFKM	GO:0006096	glycolytic process	GO_REF:0000041	IEA	biological_process	taxon:9823	20230703
A0A8D0WIV4	PFKM	GO:0005737	cytoplasm	GO_REF:0000002	IEA	cellular_component	taxon:9823	20230703
A0A8D0WIV4	PFKM	GO:0016301	kinase activity	GO_REF:0000043	IEA	molecular_function	taxon:9823	20230703
A0A8D0WIV4	PFKM	GO:0006002	fructose 6-phosphate metabolic process	GO_REF:0000002	IEA	biological_process	taxon:9823	20230703
A0A8D0WIV4	PFKM	GO:0005524	ATP binding	GO_REF:0000002	IEA	molecular_function	taxon:9823	20230703
A0A8D0WIV4	PFKM	GO:0006096	glycolytic process	GO_REF:0000104	IEA	biological_process	taxon:9823	20230703
A0A8D0WIV4	PFKM	GO:0003872	6-phosphofructokinase activity	GO_REF:0000104	IEA	molecular_function	taxon:9823	20230703
A0A8D0WIV4	PFKM	GO:0016310	phosphorylation	GO_REF:0000043	IEA	biological_process	taxon:9823	20230703
A0A8D0WIV4	PFKM	GO:0016740	transferase activity	GO_REF:0000043	IEA	molecular_function	taxon:9823	20230703
A0A8D0WIV4	PFKM	GO:0005524	ATP binding	GO_REF:0000043	IEA	molecular_function	taxon:9823	20230703
A0A8D0WIV4	PFKM	GO:0006096	glycolytic process	GO_REF:0000043	IEA	biological_process	taxon:9823	20230703
A0A8D0WIV4	PFKM	GO:0061615	glycolytic process through fructose-6-phosphate	GO_REF:0000108	IEA	biological_process	taxon:9823	20230705
A0A8D0WIV4	PFKM	GO:0005737	cytoplasm	GO_REF:0000104	IEA	cellular_component	taxon:9823	20230703
A0A8D0WIV4	PFKM	GO:0003824	catalytic activity	GO_REF:0000043	IEA	molecular_function	taxon:9823	20230703
A0A8D0WIV4	PFKM	GO:0046872	metal ion binding	GO_REF:0000043	IEA	molecular_function	taxon:9823	20230703
A0A8D0WIV4	PFKM	GO:0003872	6-phosphofructokinase activity	GO_REF:0000002	IEA	molecular_function	taxon:9823	20230703
A0A8D0WIV4	PFKM	GO:0008152	metabolic process	GO_REF:0000043	IEA	biological_process	taxon:9823	20230703
A0A8D0WIV4	PFKM	GO:0000166	nucleotide binding	GO_REF:0000043	IEA	molecular_function	taxon:9823	20230703
A0A8D0WIV4	PFKM	GO:0005737	cytoplasm	GO_REF:0000043	IEA	cellular_component	taxon:9823	20230703
A0A8D0WIV4	PFKM	GO:0006096	glycolytic process	GO_REF:0000002	IEA	biological_process	taxon:9823	20230703
A0A8D0WIV4	PFKM	GO:0005737	cytoplasm	GO_REF:0000044	IEA	cellular_component	taxon:9823	20230703
F6Q4F9	CDC37	GO:0019901	protein kinase binding	GO_REF:0000002	IEA	molecular_function	taxon:9823	20230703
F6Q4F9	CDC37	GO:0005737	cytoplasm	GO_REF:0000043	IEA	cellular_component	taxon:9823	20230703
F6Q4F9	CDC37	GO:0005737	cytoplasm	GO_REF:0000044	IEA	cellular_component	taxon:9823	20230703
B5APU3	B5APU3	GO:0005938	cell cortex	PMID:24824085	IDA	cellular_component	taxon:9823	20150911
A0A4X1UQ96	A0A4X1UQ96	GO:0071704	organic substance metabolic process	GO_REF:0000117	IEA	biological_process	taxon:9823	20230703
A0A4X1UQ96	A0A4X1UQ96	GO:0004749	ribose phosphate diphosphokinase activity	GO_REF:0000003	IEA	molecular_function	taxon:9823	20230703
A0A4X1UQ96	A0A4X1UQ96	GO:0009165	nucleotide biosynthetic process	GO_REF:0000002	IEA	biological_process	taxon:9823	20230703
A0A4X1UQ96	A0A4X1UQ96	GO:0005524	ATP binding	GO_REF:0000043	IEA	molecular_function	taxon:9823	20230703
A0A4X1UQ96	A0A4X1UQ96	GO:0004749	ribose phosphate diphosphokinase activity	GO_REF:0000002	IEA	molecular_function	taxon:9823	20230703
A0A4X1UQ96	A0A4X1UQ96	GO:0046872	metal ion binding	GO_REF:0000043	IEA	molecular_function	taxon:9823	20230703
A0A4X1UQ96	A0A4X1UQ96	GO:0009156	ribonucleoside monophosphate biosynthetic process	GO_REF:0000002	IEA	biological_process	taxon:9823	20230703
A0A4X1UQ96	A0A4X1UQ96	GO:0009165	nucleotide biosynthetic process	GO_REF:0000043	IEA	biological_process	taxon:9823	20230703
A0A4X1UQ96	A0A4X1UQ96	GO:0000287	magnesium ion binding	GO_REF:0000002	IEA	molecular_function	taxon:9823	20230703
A0A4X1UQ96	A0A4X1UQ96	GO:0016301	kinase activity	GO_REF:0000043	IEA	molecular_function	taxon:9823	20230703
A0A4X1UQ96	A0A4X1UQ96	GO:0016310	phosphorylation	GO_REF:0000043	IEA	biological_process	taxon:9823	20230703
A0A4X1UQ96	A0A4X1UQ96	GO:0006015	5-phosphoribose 1-diphosphate biosynthetic process	GO_REF:0000041	IEA	biological_process	taxon:9823	20230703
A0A4X1UQ96	A0A4X1UQ96	GO:0044249	cellular biosynthetic process	GO_REF:0000002	IEA	biological_process	taxon:9823	20230703
A0A8W4FNA3	LMNB1	GO:0005635	nuclear envelope	GO_REF:0000117	IEA	cellular_component	taxon:9823	20230703
A0A8W4FNA3	LMNB1	GO:0005882	intermediate filament	GO_REF:0000043	IEA	cellular_component	taxon:9823	20230703
A0A8W4FNA3	LMNB1	GO:0005652	nuclear lamina	GO_REF:0000044	IEA	cellular_component	taxon:9823	20230703
A0A8D1R436	CHADL	GO:0016020	membrane	GO_REF:0000002	IEA	cellular_component	taxon:9823	20230703
A0A8D1R436	CHADL	GO:0045087	innate immune response	GO_REF:0000043	IEA	biological_process	taxon:9823	20230703
A0A8D1R436	CHADL	GO:0006954	inflammatory response	GO_REF:0000043	IEA	biological_process	taxon:9823	20230703
A0A8D1R436	CHADL	GO:0004888	transmembrane signaling receptor activity	GO_REF:0000002	IEA	molecular_function	taxon:9823	20230703
A0A8D1R436	CHADL	GO:0006954	inflammatory response	GO_REF:0000104	IEA	biological_process	taxon:9823	20230703
A0A8D1R436	CHADL	GO:0002376	immune system process	GO_REF:0000043	IEA	biological_process	taxon:9823	20230703
A0A8D1R436	CHADL	GO:0006955	immune response	GO_REF:0000104	IEA	biological_process	taxon:9823	20230703
A0A8D1R436	CHADL	GO:0006955	immune response	GO_REF:0000002	IEA	biological_process	taxon:9823	20230703
A0A8D1R436	CHADL	GO:0002224	toll-like receptor signaling pathway	GO_REF:0000002	IEA	biological_process	taxon:9823	20230703
A0A8D1R436	CHADL	GO:0045087	innate immune response	GO_REF:0000104	IEA	biological_process	taxon:9823	20230703
B6V8C7	B6V8C7	GO:0005840	ribosome	GO_REF:0000043	IEA	cellular_component	taxon:9823	20230703
B6V8C7	B6V8C7	GO:0003735	structural constituent of ribosome	GO_REF:0000002	IEA	molecular_function	taxon:9823	20230703
B6V8C7	B6V8C7	GO:0006412	translation	GO_REF:0000002	IEA	biological_process	taxon:9823	20230703
B6V8C7	B6V8C7	GO:0005840	ribosome	GO_REF:0000002	IEA	cellular_component	taxon:9823	20230703
B6V8C7	B6V8C7	GO:0005737	cytoplasm	GO_REF:0000117	IEA	cellular_component	taxon:9823	20230703
B6V8C7	B6V8C7	GO:1990904	ribonucleoprotein complex	GO_REF:0000043	IEA	cellular_component	taxon:9823	20230703
S5Y9V4	FRZB	GO:0030178	negative regulation of Wnt signaling pathway	GO_REF:0000107	IEA	biological_process	taxon:9823	20230703
S5Y9V4	FRZB	GO:0030308	negative regulation of cell growth	GO_REF:0000107	IEA	biological_process	taxon:9823	20230703
S5Y9V4	FRZB	GO:0005576	extracellular region	GO_REF:0000043	IEA	cellular_component	taxon:9823	20230703
S5Y9V4	FRZB	GO:0043065	positive regulation of apoptotic process	GO_REF:0000107	IEA	biological_process	taxon:9823	20230703
S5Y9V4	FRZB	GO:0016055	Wnt signaling pathway	GO_REF:0000043	IEA	biological_process	taxon:9823	20230703
S5Y9V4	FRZB	GO:0090090	negative regulation of canonical Wnt signaling pathway	GO_REF:0000107	IEA	biological_process	taxon:9823	20230703
S5Y9V4	FRZB	GO:0045600	positive regulation of fat cell differentiation	GO_REF:0000107	IEA	biological_process	taxon:9823	20230703
S5Y9V4	FRZB	GO:0030154	cell differentiation	GO_REF:0000043	IEA	biological_process	taxon:9823	20230703
S5Y9V4	FRZB	GO:0008285	negative regulation of cell population proliferation	GO_REF:0000107	IEA	biological_process	taxon:9823	20230703
A0A8D0MLR2	A0A8D0MLR2	GO:0007156	homophilic cell adhesion via plasma membrane adhesion molecules	GO_REF:0000002	IEA	biological_process	taxon:9823	20230703
A0A8D0MLR2	A0A8D0MLR2	GO:0005509	calcium ion binding	GO_REF:0000002	IEA	molecular_function	taxon:9823	20230703
A0A8D0MLR2	A0A8D0MLR2	GO:0005509	calcium ion binding	GO_REF:0000104	IEA	molecular_function	taxon:9823	20230703
A0A8D0MLR2	A0A8D0MLR2	GO:0016020	membrane	GO_REF:0000002	IEA	cellular_component	taxon:9823	20230703
A0A8D0MLR2	A0A8D0MLR2	GO:0005886	plasma membrane	GO_REF:0000002	IEA	cellular_component	taxon:9823	20230703
A0A8D0MLR2	A0A8D0MLR2	GO:0005886	plasma membrane	GO_REF:0000043	IEA	cellular_component	taxon:9823	20230703
A0A8D0MLR2	A0A8D0MLR2	GO:0007155	cell adhesion	GO_REF:0000002	IEA	biological_process	taxon:9823	20230703
A0A8D0MLR2	A0A8D0MLR2	GO:0005886	plasma membrane	GO_REF:0000117	IEA	cellular_component	taxon:9823	20230703
A0A8D0MLR2	A0A8D0MLR2	GO:0098609	cell-cell adhesion	GO_REF:0000002	IEA	biological_process	taxon:9823	20230703
A0A4X1UDT4	COLGALT1	GO:1904028	positive regulation of collagen fibril organization	GO_REF:0000107	IEA	biological_process	taxon:9823	20230703
A0A4X1UDT4	COLGALT1	GO:0050211	procollagen galactosyltransferase activity	GO_REF:0000107	IEA	molecular_function	taxon:9823	20230703
A0A4X1UDT4	COLGALT1	GO:0005788	endoplasmic reticulum lumen	GO_REF:0000107	IEA	cellular_component	taxon:9823	20230703
A0A287AVV5	MBNL1	GO:0046872	metal ion binding	GO_REF:0000043	IEA	molecular_function	taxon:9823	20230703
A0A287AVV5	MBNL1	GO:0046872	metal ion binding	GO_REF:0000002	IEA	molecular_function	taxon:9823	20230703
B6VAP9	APEX1	GO:0005737	cytoplasm	GO_REF:0000044	IEA	cellular_component	taxon:9823	20230703
B6VAP9	APEX1	GO:0005739	mitochondrion	GO_REF:0000044	IEA	cellular_component	taxon:9823	20230703
B6VAP9	APEX1	GO:0004519	endonuclease activity	GO_REF:0000002	IEA	molecular_function	taxon:9823	20230703
B6VAP9	APEX1	GO:0006974	cellular response to DNA damage stimulus	GO_REF:0000043	IEA	biological_process	taxon:9823	20230703
B6VAP9	APEX1	GO:0005739	mitochondrion	GO_REF:0000043	IEA	cellular_component	taxon:9823	20230703
B6VAP9	APEX1	GO:0004518	nuclease activity	GO_REF:0000043	IEA	molecular_function	taxon:9823	20230703
B6VAP9	APEX1	GO:0003824	catalytic activity	GO_REF:0000002	IEA	molecular_function	taxon:9823	20230703
B6VAP9	APEX1	GO:0003677	DNA binding	GO_REF:0000002	IEA	molecular_function	taxon:9823	20230703
B6VAP9	APEX1	GO:0006281	DNA repair	GO_REF:0000002	IEA	biological_process	taxon:9823	20230703
B6VAP9	APEX1	GO:0005634	nucleus	GO_REF:0000044	IEA	cellular_component	taxon:9823	20230703
B6VAP9	APEX1	GO:0004519	endonuclease activity	GO_REF:0000043	IEA	molecular_function	taxon:9823	20230703
B6VAP9	APEX1	GO:0016787	hydrolase activity	GO_REF:0000043	IEA	molecular_function	taxon:9823	20230703
B6VAP9	APEX1	GO:0005634	nucleus	GO_REF:0000043	IEA	cellular_component	taxon:9823	20230703
B6VAP9	APEX1	GO:0004518	nuclease activity	GO_REF:0000002	IEA	molecular_function	taxon:9823	20230703
B6VAP9	APEX1	GO:0006310	DNA recombination	GO_REF:0000043	IEA	biological_process	taxon:9823	20230703
B6VAP9	APEX1	GO:0005737	cytoplasm	GO_REF:0000043	IEA	cellular_component	taxon:9823	20230703
B6VAP9	APEX1	GO:0046872	metal ion binding	GO_REF:0000043	IEA	molecular_function	taxon:9823	20230703
B6VAP9	APEX1	GO:0006281	DNA repair	GO_REF:0000043	IEA	biological_process	taxon:9823	20230703
B6VAP9	APEX1	GO:0003677	DNA binding	GO_REF:0000043	IEA	molecular_function	taxon:9823	20230703
A0A4X1TPH1	PBLD	GO:0003824	catalytic activity	GO_REF:0000002	IEA	molecular_function	taxon:9823	20230703
A0A4X1TPH1	PBLD	GO:0009058	biosynthetic process	GO_REF:0000002	IEA	biological_process	taxon:9823	20230703
A0A4X1TPH1	PBLD	GO:0016020	membrane	GO_REF:0000043	IEA	cellular_component	taxon:9823	20230703
A0A8D1GQD1	NAPRT	GO:0009435	NAD biosynthetic process	GO_REF:0000002	IEA	biological_process	taxon:9823	20230703
A0A8D1GQD1	NAPRT	GO:0004516	nicotinate phosphoribosyltransferase activity	GO_REF:0000002	IEA	molecular_function	taxon:9823	20230703
A0A8D1GQD1	NAPRT	GO:0016874	ligase activity	GO_REF:0000043	IEA	molecular_function	taxon:9823	20230703
A0A8D1GQD1	NAPRT	GO:0019363	pyridine nucleotide biosynthetic process	GO_REF:0000043	IEA	biological_process	taxon:9823	20230703
A0A8D1GQD1	NAPRT	GO:0009435	NAD biosynthetic process	GO_REF:0000041	IEA	biological_process	taxon:9823	20230703
A0A8D1GQD1	NAPRT	GO:0004516	nicotinate phosphoribosyltransferase activity	GO_REF:0000117	IEA	molecular_function	taxon:9823	20230703
A0A8D0M6G9	ATP2B1	GO:0000166	nucleotide binding	GO_REF:0000002	IEA	molecular_function	taxon:9823	20230703
A0A8D0M6G9	ATP2B1	GO:0016020	membrane	GO_REF:0000044	IEA	cellular_component	taxon:9823	20230703
A0A8D0M6G9	ATP2B1	GO:0070588	calcium ion transmembrane transport	GO_REF:0000002	IEA	biological_process	taxon:9823	20230703
A0A8D0M6G9	ATP2B1	GO:0000166	nucleotide binding	GO_REF:0000043	IEA	molecular_function	taxon:9823	20230703
A0A8D0M6G9	ATP2B1	GO:0005524	ATP binding	GO_REF:0000002	IEA	molecular_function	taxon:9823	20230703
A0A8D0M6G9	ATP2B1	GO:0016020	membrane	GO_REF:0000043	IEA	cellular_component	taxon:9823	20230703
A0A8D0M6G9	ATP2B1	GO:0005886	plasma membrane	GO_REF:0000117	IEA	cellular_component	taxon:9823	20230703
A0A8D0M6G9	ATP2B1	GO:0006816	calcium ion transport	GO_REF:0000043	IEA	biological_process	taxon:9823	20230703
A0A8D0M6G9	ATP2B1	GO:0006811	monoatomic ion transport	GO_REF:0000043	IEA	biological_process	taxon:9823	20230703
A0A8D0M6G9	ATP2B1	GO:0016887	ATP hydrolysis activity	GO_REF:0000002	IEA	molecular_function	taxon:9823	20230703
A0A8D0M6G9	ATP2B1	GO:0005388	P-type calcium transporter activity	GO_REF:0000002	IEA	molecular_function	taxon:9823	20230703
A0A8D0M6G9	ATP2B1	GO:0016020	membrane	GO_REF:0000002	IEA	cellular_component	taxon:9823	20230703
A0A8D0M6G9	ATP2B1	GO:0046872	metal ion binding	GO_REF:0000043	IEA	molecular_function	taxon:9823	20230703
A0A8D0M6G9	ATP2B1	GO:0005524	ATP binding	GO_REF:0000043	IEA	molecular_function	taxon:9823	20230703
A0A8D0VE17	TIMP2	GO:0030414	peptidase inhibitor activity	GO_REF:0000043	IEA	molecular_function	taxon:9823	20230703
A0A8D0VE17	TIMP2	GO:0008191	metalloendopeptidase inhibitor activity	GO_REF:0000002	IEA	molecular_function	taxon:9823	20230703
A0A8D0VE17	TIMP2	GO:0004857	enzyme inhibitor activity	GO_REF:0000043	IEA	molecular_function	taxon:9823	20230703
A0A8D0VE17	TIMP2	GO:0008191	metalloendopeptidase inhibitor activity	GO_REF:0000043	IEA	molecular_function	taxon:9823	20230703
A0A480T819	A0A480T819	GO:0003872	6-phosphofructokinase activity	GO_REF:0000104	IEA	molecular_function	taxon:9823	20230703
A0A480T819	A0A480T819	GO:0006096	glycolytic process	GO_REF:0000002	IEA	biological_process	taxon:9823	20230703
A0A480T819	A0A480T819	GO:0008152	metabolic process	GO_REF:0000043	IEA	biological_process	taxon:9823	20230703
A0A480T819	A0A480T819	GO:0006096	glycolytic process	GO_REF:0000041	IEA	biological_process	taxon:9823	20230703
A0A480T819	A0A480T819	GO:0006002	fructose 6-phosphate metabolic process	GO_REF:0000002	IEA	biological_process	taxon:9823	20230703
A0A480T819	A0A480T819	GO:0016301	kinase activity	GO_REF:0000043	IEA	molecular_function	taxon:9823	20230703
A0A480T819	A0A480T819	GO:0046872	metal ion binding	GO_REF:0000043	IEA	molecular_function	taxon:9823	20230703
A0A480T819	A0A480T819	GO:0006096	glycolytic process	GO_REF:0000104	IEA	biological_process	taxon:9823	20230703
A0A480T819	A0A480T819	GO:0005737	cytoplasm	GO_REF:0000044	IEA	cellular_component	taxon:9823	20230703
A0A480T819	A0A480T819	GO:0005524	ATP binding	GO_REF:0000002	IEA	molecular_function	taxon:9823	20230703
A0A480T819	A0A480T819	GO:0005737	cytoplasm	GO_REF:0000002	IEA	cellular_component	taxon:9823	20230703
A0A480T819	A0A480T819	GO:0000166	nucleotide binding	GO_REF:0000043	IEA	molecular_function	taxon:9823	20230703
A0A480T819	A0A480T819	GO:0003824	catalytic activity	GO_REF:0000043	IEA	molecular_function	taxon:9823	20230703
A0A480T819	A0A480T819	GO:0006096	glycolytic process	GO_REF:0000043	IEA	biological_process	taxon:9823	20230703
A0A480T819	A0A480T819	GO:0061615	glycolytic process through fructose-6-phosphate	GO_REF:0000108	IEA	biological_process	taxon:9823	20230705
A0A480T819	A0A480T819	GO:0016310	phosphorylation	GO_REF:0000043	IEA	biological_process	taxon:9823	20230703
A0A480T819	A0A480T819	GO:0016740	transferase activity	GO_REF:0000043	IEA	molecular_function	taxon:9823	20230703
A0A480T819	A0A480T819	GO:0003872	6-phosphofructokinase activity	GO_REF:0000003	IEA	molecular_function	taxon:9823	20230703
A0A480T819	A0A480T819	GO:0005524	ATP binding	GO_REF:0000043	IEA	molecular_function	taxon:9823	20230703
A0A480T819	A0A480T819	GO:0005737	cytoplasm	GO_REF:0000104	IEA	cellular_component	taxon:9823	20230703
A0A480T819	A0A480T819	GO:0005737	cytoplasm	GO_REF:0000043	IEA	cellular_component	taxon:9823	20230703
A0A480T819	A0A480T819	GO:0003872	6-phosphofructokinase activity	GO_REF:0000002	IEA	molecular_function	taxon:9823	20230703
A0A8D0RMX5	A0A8D0RMX5	GO:0016020	membrane	GO_REF:0000043	IEA	cellular_component	taxon:9823	20230703
A0A8D0RMX5	A0A8D0RMX5	GO:0016491	oxidoreductase activity	GO_REF:0000002	IEA	molecular_function	taxon:9823	20230703
A0A8D0RMX5	A0A8D0RMX5	GO:0006081	cellular aldehyde metabolic process	GO_REF:0000002	IEA	biological_process	taxon:9823	20230703
A0A8D0RMX5	A0A8D0RMX5	GO:0016491	oxidoreductase activity	GO_REF:0000043	IEA	molecular_function	taxon:9823	20230703
A0A8D0RMX5	A0A8D0RMX5	GO:0016620	oxidoreductase activity, acting on the aldehyde or oxo group of donors, NAD or NADP as acceptor	GO_REF:0000002	IEA	molecular_function	taxon:9823	20230703
A0A8D0J710	A0A8D0J710	GO:0005681	spliceosomal complex	GO_REF:0000002	IEA	cellular_component	taxon:9823	20230703
A0A8D0J710	A0A8D0J710	GO:0005634	nucleus	GO_REF:0000044	IEA	cellular_component	taxon:9823	20230703
A0A8D0J710	A0A8D0J710	GO:0005634	nucleus	GO_REF:0000002	IEA	cellular_component	taxon:9823	20230703
A0A8D0J710	A0A8D0J710	GO:0005634	nucleus	GO_REF:0000043	IEA	cellular_component	taxon:9823	20230703
A0A8D0J710	A0A8D0J710	GO:0006397	mRNA processing	GO_REF:0000043	IEA	biological_process	taxon:9823	20230703
A0A8D0J710	A0A8D0J710	GO:0000398	mRNA splicing, via spliceosome	GO_REF:0000002	IEA	biological_process	taxon:9823	20230703
A0A8D0J710	A0A8D0J710	GO:0008270	zinc ion binding	GO_REF:0000002	IEA	molecular_function	taxon:9823	20230703
A0A8D0J710	A0A8D0J710	GO:0046872	metal ion binding	GO_REF:0000043	IEA	molecular_function	taxon:9823	20230703
A0A8D0J710	A0A8D0J710	GO:0003676	nucleic acid binding	GO_REF:0000002	IEA	molecular_function	taxon:9823	20230703
A0A8D0J710	A0A8D0J710	GO:0008380	RNA splicing	GO_REF:0000043	IEA	biological_process	taxon:9823	20230703
A0A8D0J710	A0A8D0J710	GO:0003723	RNA binding	GO_REF:0000002	IEA	molecular_function	taxon:9823	20230703
A0A8D0M3L7	A0A8D0M3L7	GO:0016787	hydrolase activity	GO_REF:0000043	IEA	molecular_function	taxon:9823	20230703
A0A8D0M3L7	A0A8D0M3L7	GO:0070008	serine-type exopeptidase activity	GO_REF:0000002	IEA	molecular_function	taxon:9823	20230703
A0A8D0M3L7	A0A8D0M3L7	GO:0006508	proteolysis	GO_REF:0000002	IEA	biological_process	taxon:9823	20230703
A0A480KCZ0	A0A480KCZ0	GO:0006693	prostaglandin metabolic process	GO_REF:0000117	IEA	biological_process	taxon:9823	20230703
A0A480KCZ0	A0A480KCZ0	GO:0016628	oxidoreductase activity, acting on the CH-CH group of donors, NAD or NADP as acceptor	GO_REF:0000002	IEA	molecular_function	taxon:9823	20230703
A0A480KCZ0	A0A480KCZ0	GO:0047522	15-oxoprostaglandin 13-oxidase activity	GO_REF:0000003	IEA	molecular_function	taxon:9823	20230703
A0A480KCZ0	A0A480KCZ0	GO:0036132	13-prostaglandin reductase activity	GO_REF:0000003	IEA	molecular_function	taxon:9823	20230703
A0A5G2QML3	H1-3	GO:0005694	chromosome	GO_REF:0000043	IEA	cellular_component	taxon:9823	20230703
A0A5G2QML3	H1-3	GO:0000785	chromatin	GO_REF:0000107	IEA	cellular_component	taxon:9823	20230703
A0A5G2QML3	H1-3	GO:0003677	DNA binding	GO_REF:0000043	IEA	molecular_function	taxon:9823	20230703
A0A5G2QML3	H1-3	GO:0000786	nucleosome	GO_REF:0000002	IEA	cellular_component	taxon:9823	20230703
A0A5G2QML3	H1-3	GO:0003677	DNA binding	GO_REF:0000002	IEA	molecular_function	taxon:9823	20230703
A0A5G2QML3	H1-3	GO:0046982	protein heterodimerization activity	GO_REF:0000002	IEA	molecular_function	taxon:9823	20230703
A0A5G2QML3	H1-3	GO:0005634	nucleus	GO_REF:0000043	IEA	cellular_component	taxon:9823	20230703
A0A5G2QML3	H1-3	GO:0005634	nucleus	GO_REF:0000044	IEA	cellular_component	taxon:9823	20230703
A0A5G2QML3	H1-3	GO:0000786	nucleosome	GO_REF:0000043	IEA	cellular_component	taxon:9823	20230703
A0A5G2QML3	H1-3	GO:0000791	euchromatin	GO_REF:0000107	IEA	cellular_component	taxon:9823	20230703
A0A5G2QML3	H1-3	GO:0006334	nucleosome assembly	GO_REF:0000002	IEA	biological_process	taxon:9823	20230703
A0A5G2QML3	H1-3	GO:0030527	structural constituent of chromatin	GO_REF:0000002	IEA	molecular_function	taxon:9823	20230703
A0A5G2QML3	H1-3	GO:0031490	chromatin DNA binding	GO_REF:0000107	IEA	molecular_function	taxon:9823	20230703
Q0PY11	EEF1A	GO:0006412	translation	GO_REF:0000043	IEA	biological_process	taxon:9823	20230703
Q0PY11	EEF1A	GO:0005515	protein binding	PMID:26266418	IPI	molecular_function	taxon:9823	20230710
Q0PY11	EEF1A	GO:0005525	GTP binding	GO_REF:0000002	IEA	molecular_function	taxon:9823	20230703
Q0PY11	EEF1A	GO:0006414	translational elongation	GO_REF:0000043	IEA	biological_process	taxon:9823	20230703
Q0PY11	EEF1A	GO:0005525	GTP binding	GO_REF:0000043	IEA	molecular_function	taxon:9823	20230703
Q0PY11	EEF1A	GO:0006414	translational elongation	GO_REF:0000002	IEA	biological_process	taxon:9823	20230703
Q0PY11	EEF1A	GO:0003746	translation elongation factor activity	GO_REF:0000002	IEA	molecular_function	taxon:9823	20230703
Q0PY11	EEF1A	GO:0005525	GTP binding	GO_REF:0000104	IEA	molecular_function	taxon:9823	20230703
Q0PY11	EEF1A	GO:0003924	GTPase activity	GO_REF:0000104	IEA	molecular_function	taxon:9823	20230703
Q0PY11	EEF1A	GO:0003746	translation elongation factor activity	GO_REF:0000104	IEA	molecular_function	taxon:9823	20230703
Q0PY11	EEF1A	GO:0003746	translation elongation factor activity	GO_REF:0000043	IEA	molecular_function	taxon:9823	20230703
Q0PY11	EEF1A	GO:0003924	GTPase activity	GO_REF:0000002	IEA	molecular_function	taxon:9823	20230703
Q0PY11	EEF1A	GO:0000166	nucleotide binding	GO_REF:0000043	IEA	molecular_function	taxon:9823	20230703
A0A8D1TQK2	CLEC11A	GO:0030246	carbohydrate binding	GO_REF:0000043	IEA	molecular_function	taxon:9823	20230703
A0A480F699	A0A480F699	GO:0005509	calcium ion binding	GO_REF:0000002	IEA	molecular_function	taxon:9823	20230703
A0A480F699	A0A480F699	GO:0046872	metal ion binding	GO_REF:0000043	IEA	molecular_function	taxon:9823	20230703
A0A287BCX9	TMED1	GO:0005794	Golgi apparatus	PMID:21873635	IBA	cellular_component	taxon:9823	20230111
A0A287BCX9	TMED1	GO:0043231	intracellular membrane-bounded organelle	GO_REF:0000117	IEA	cellular_component	taxon:9823	20230703
A0A287BCX9	TMED1	GO:0015031	protein transport	GO_REF:0000043	IEA	biological_process	taxon:9823	20230703
A0A287BCX9	TMED1	GO:0030134	COPII-coated ER to Golgi transport vesicle	PMID:21873635	IBA	cellular_component	taxon:9823	20170609
A0A287BCX9	TMED1	GO:0016020	membrane	GO_REF:0000044	IEA	cellular_component	taxon:9823	20230703
A0A287BCX9	TMED1	GO:0006886	intracellular protein transport	PMID:21873635	IBA	biological_process	taxon:9823	20170609
A0A287BCX9	TMED1	GO:0033116	endoplasmic reticulum-Golgi intermediate compartment membrane	GO_REF:0000044	IEA	cellular_component	taxon:9823	20230703
A0A287BCX9	TMED1	GO:0005737	cytoplasm	GO_REF:0000117	IEA	cellular_component	taxon:9823	20230703
A0A287BCX9	TMED1	GO:0005793	endoplasmic reticulum-Golgi intermediate compartment	GO_REF:0000107	IEA	cellular_component	taxon:9823	20230703
A0A287BCX9	TMED1	GO:0006888	endoplasmic reticulum to Golgi vesicle-mediated transport	PMID:21873635	IBA	biological_process	taxon:9823	20230406
A0A287BCX9	TMED1	GO:0005789	endoplasmic reticulum membrane	GO_REF:0000044	IEA	cellular_component	taxon:9823	20230703
A0A287BCX9	TMED1	GO:0005783	endoplasmic reticulum	GO_REF:0000107	IEA	cellular_component	taxon:9823	20230703
A0A287BCX9	TMED1	GO:0005783	endoplasmic reticulum	PMID:21873635	IBA	cellular_component	taxon:9823	20210531
A0A287BCX9	TMED1	GO:0005794	Golgi apparatus	GO_REF:0000044	IEA	cellular_component	taxon:9823	20230703
A0A287BCX9	TMED1	GO:0016020	membrane	GO_REF:0000043	IEA	cellular_component	taxon:9823	20230703
A0A287BCX9	TMED1	GO:0007030	Golgi organization	PMID:21873635	IBA	biological_process	taxon:9823	20170609
A0A287BCX9	TMED1	GO:0005794	Golgi apparatus	GO_REF:0000107	IEA	cellular_component	taxon:9823	20230703
A0A287BCX9	TMED1	GO:0005793	endoplasmic reticulum-Golgi intermediate compartment	PMID:21873635	IBA	cellular_component	taxon:9823	20210531
A0A287BCX9	TMED1	GO:0005783	endoplasmic reticulum	GO_REF:0000043	IEA	cellular_component	taxon:9823	20230703
A0A8D0J4E1	A0A8D0J4E1	GO:0004869	cysteine-type endopeptidase inhibitor activity	GO_REF:0000002	IEA	molecular_function	taxon:9823	20230703
A0A4X1VD93	A0A286ZSX6	GO:0003823	antigen binding	PMID:21873635	IBA	molecular_function	taxon:9823	20230314
A0A4X1VD93	A0A286ZSX6	GO:0016064	immunoglobulin mediated immune response	PMID:21873635	IBA	biological_process	taxon:9823	20230314
A0A5G2Q7Z2	A0A8W4FCZ9	GO:0005634	nucleus	GO_REF:0000043	IEA	cellular_component	taxon:9823	20230703
A0A5G2Q7Z2	A0A8W4FCZ9	GO:0007155	cell adhesion	GO_REF:0000043	IEA	biological_process	taxon:9823	20230703
A0A5G2Q7Z2	A0A8W4FCZ9	GO:0005737	cytoplasm	GO_REF:0000044	IEA	cellular_component	taxon:9823	20230703
A0A5G2Q7Z2	A0A8W4FCZ9	GO:0005576	extracellular region	GO_REF:0000043	IEA	cellular_component	taxon:9823	20230703
A0A5G2Q7Z2	A0A8W4FCZ9	GO:0046872	metal ion binding	GO_REF:0000043	IEA	molecular_function	taxon:9823	20230703
A0A5G2Q7Z2	A0A8W4FCZ9	GO:0005634	nucleus	GO_REF:0000044	IEA	cellular_component	taxon:9823	20230703
A0A5G2Q7Z2	A0A8W4FCZ9	GO:0008270	zinc ion binding	GO_REF:0000002	IEA	molecular_function	taxon:9823	20230703
A0A5G2Q7Z2	A0A8W4FCZ9	GO:0005509	calcium ion binding	GO_REF:0000002	IEA	molecular_function	taxon:9823	20230703
A0A5G2Q7Z2	A0A8W4FCZ9	GO:0005576	extracellular region	GO_REF:0000044	IEA	cellular_component	taxon:9823	20230703
A0A5K1VU58	RBBP4	GO:0005634	nucleus	GO_REF:0000043	IEA	cellular_component	taxon:9823	20230703
A0A5K1VU58	RBBP4	GO:0005634	nucleus	GO_REF:0000044	IEA	cellular_component	taxon:9823	20230703
A0A4X1T3J6	LSS	GO:0016104	triterpenoid biosynthetic process	GO_REF:0000002	IEA	biological_process	taxon:9823	20230703
A0A4X1T3J6	LSS	GO:0016866	intramolecular transferase activity	GO_REF:0000002	IEA	molecular_function	taxon:9823	20230703
A0A4X1T3J6	LSS	GO:0016853	isomerase activity	GO_REF:0000043	IEA	molecular_function	taxon:9823	20230703
A0A4X1T3J6	LSS	GO:0005811	lipid droplet	GO_REF:0000002	IEA	cellular_component	taxon:9823	20230703
A0A8D1ULG8	A0A8D1ULG8	GO:0051781	positive regulation of cell division	GO_REF:0000043	IEA	biological_process	taxon:9823	20230703
A0A8D1ULG8	A0A8D1ULG8	GO:0007165	signal transduction	GO_REF:0000108	IEA	biological_process	taxon:9823	20230705
A0A8D1ULG8	A0A8D1ULG8	GO:0050896	response to stimulus	GO_REF:0000117	IEA	biological_process	taxon:9823	20230703
A0A8D1ULG8	A0A8D1ULG8	GO:0008083	growth factor activity	GO_REF:0000002	IEA	molecular_function	taxon:9823	20230703
A0A8D1ULG8	A0A8D1ULG8	GO:0008201	heparin binding	GO_REF:0000043	IEA	molecular_function	taxon:9823	20230703
A0A8D1ULG8	A0A8D1ULG8	GO:0005576	extracellular region	GO_REF:0000043	IEA	cellular_component	taxon:9823	20230703
A0A4X1SNM0	A0A4X1SNM0	GO:0008233	peptidase activity	GO_REF:0000002	IEA	molecular_function	taxon:9823	20230703
A0A4X1SNM0	A0A4X1SNM0	GO:0003743	translation initiation factor activity	GO_REF:0000002	IEA	molecular_function	taxon:9823	20230703
A0A4X1SNM0	A0A4X1SNM0	GO:0031369	translation initiation factor binding	GO_REF:0000002	IEA	molecular_function	taxon:9823	20230703
A0A4X1SNM0	A0A4X1SNM0	GO:0008237	metallopeptidase activity	GO_REF:0000002	IEA	molecular_function	taxon:9823	20230703
A0A4X1SNM0	A0A4X1SNM0	GO:0006413	translational initiation	GO_REF:0000002	IEA	biological_process	taxon:9823	20230703
A0A4X1SNM0	A0A4X1SNM0	GO:0005852	eukaryotic translation initiation factor 3 complex	GO_REF:0000002	IEA	cellular_component	taxon:9823	20230703
A0A8D0JVJ6	A0A8D0JVJ6	GO:0016209	antioxidant activity	GO_REF:0000043	IEA	molecular_function	taxon:9823	20230703
A0A8D0JVJ6	A0A8D0JVJ6	GO:0016491	oxidoreductase activity	GO_REF:0000002	IEA	molecular_function	taxon:9823	20230703
A0A8D0JVJ6	A0A8D0JVJ6	GO:0016209	antioxidant activity	GO_REF:0000002	IEA	molecular_function	taxon:9823	20230703
A0A8D0JVJ6	A0A8D0JVJ6	GO:0004601	peroxidase activity	GO_REF:0000043	IEA	molecular_function	taxon:9823	20230703
A0A8D0JVJ6	A0A8D0JVJ6	GO:0016491	oxidoreductase activity	GO_REF:0000043	IEA	molecular_function	taxon:9823	20230703
A0A8D0JVJ6	A0A8D0JVJ6	GO:0098869	cellular oxidant detoxification	GO_REF:0000108	IEA	biological_process	taxon:9823	20230705
A0A8D0JVJ6	A0A8D0JVJ6	GO:0051920	peroxiredoxin activity	GO_REF:0000002	IEA	molecular_function	taxon:9823	20230703
A0A8D0M0A6	A0A8D0M0A6	GO:0006098	pentose-phosphate shunt	GO_REF:0000041	IEA	biological_process	taxon:9823	20230703
A0A8D0M0A6	A0A8D0M0A6	GO:0005975	carbohydrate metabolic process	GO_REF:0000002	IEA	biological_process	taxon:9823	20230703
A0A8D0M0A6	A0A8D0M0A6	GO:0005975	carbohydrate metabolic process	GO_REF:0000104	IEA	biological_process	taxon:9823	20230703
A0A8D0M0A6	A0A8D0M0A6	GO:0016787	hydrolase activity	GO_REF:0000043	IEA	molecular_function	taxon:9823	20230703
A0A8D0M0A6	A0A8D0M0A6	GO:0006098	pentose-phosphate shunt	GO_REF:0000002	IEA	biological_process	taxon:9823	20230703
A0A8D0M0A6	A0A8D0M0A6	GO:0017057	6-phosphogluconolactonase activity	GO_REF:0000002	IEA	molecular_function	taxon:9823	20230703
A0A8D0M0A6	A0A8D0M0A6	GO:0017057	6-phosphogluconolactonase activity	GO_REF:0000104	IEA	molecular_function	taxon:9823	20230703
A0A5G2QG45	NUDT3	GO:0016462	pyrophosphatase activity	GO_REF:0000002	IEA	molecular_function	taxon:9823	20230703
A0A5G2QG45	NUDT3	GO:0016787	hydrolase activity	GO_REF:0000043	IEA	molecular_function	taxon:9823	20230703
A0A5G2QG45	NUDT3	GO:0016787	hydrolase activity	GO_REF:0000002	IEA	molecular_function	taxon:9823	20230703
A0A8D1DJ64	FARP1	GO:0005856	cytoskeleton	GO_REF:0000002	IEA	cellular_component	taxon:9823	20230703
A0A8D1DJ64	FARP1	GO:0005085	guanyl-nucleotide exchange factor activity	GO_REF:0000002	IEA	molecular_function	taxon:9823	20230703
A0A8D0ZL36	A0A8D0ZL36	GO:0016020	membrane	GO_REF:0000043	IEA	cellular_component	taxon:9823	20230703
A0A8D0ZL36	A0A8D0ZL36	GO:0016020	membrane	GO_REF:0000002	IEA	cellular_component	taxon:9823	20230703
A0A8D0ZL36	A0A8D0ZL36	GO:0009966	regulation of signal transduction	GO_REF:0000002	IEA	biological_process	taxon:9823	20230703
A0A8D0ZL36	A0A8D0ZL36	GO:0005783	endoplasmic reticulum	GO_REF:0000043	IEA	cellular_component	taxon:9823	20230703
A0A8D0MVS1	A0A8D0MVS1	GO:0042379	chemokine receptor binding	GO_REF:0000117	IEA	molecular_function	taxon:9823	20230703
A0A8D0MVS1	A0A8D0MVS1	GO:0006935	chemotaxis	GO_REF:0000117	IEA	biological_process	taxon:9823	20230703
A0A8D0MVS1	A0A8D0MVS1	GO:0005576	extracellular region	GO_REF:0000002	IEA	cellular_component	taxon:9823	20230703
A0A8D0MVS1	A0A8D0MVS1	GO:0016477	cell migration	GO_REF:0000117	IEA	biological_process	taxon:9823	20230703
A0A8D0MVS1	A0A8D0MVS1	GO:0008009	chemokine activity	GO_REF:0000002	IEA	molecular_function	taxon:9823	20230703
A0A8D0MVS1	A0A8D0MVS1	GO:0005125	cytokine activity	GO_REF:0000043	IEA	molecular_function	taxon:9823	20230703
A0A8D0MVS1	A0A8D0MVS1	GO:0006955	immune response	GO_REF:0000002	IEA	biological_process	taxon:9823	20230703
A0A8D0MVS1	A0A8D0MVS1	GO:0007165	signal transduction	GO_REF:0000117	IEA	biological_process	taxon:9823	20230703
A0A8D0MVS1	A0A8D0MVS1	GO:0005576	extracellular region	GO_REF:0000044	IEA	cellular_component	taxon:9823	20230703
A0A8D0MVS1	A0A8D0MVS1	GO:0006935	chemotaxis	GO_REF:0000043	IEA	biological_process	taxon:9823	20230703
A0A8D0MVS1	A0A8D0MVS1	GO:0005615	extracellular space	GO_REF:0000043	IEA	cellular_component	taxon:9823	20230703
A0A8D0MVS1	A0A8D0MVS1	GO:0060326	cell chemotaxis	GO_REF:0000108	IEA	biological_process	taxon:9823	20230705
A0A8D0MVS1	A0A8D0MVS1	GO:0005576	extracellular region	GO_REF:0000043	IEA	cellular_component	taxon:9823	20230703
Q2EHH7	PPP1CC	GO:0051301	cell division	GO_REF:0000043	IEA	biological_process	taxon:9823	20230703
Q2EHH7	PPP1CC	GO:0004722	protein serine/threonine phosphatase activity	GO_REF:0000003	IEA	molecular_function	taxon:9823	20230703
Q2EHH7	PPP1CC	GO:0017018	myosin phosphatase activity	GO_REF:0000003	IEA	molecular_function	taxon:9823	20230703
Q2EHH7	PPP1CC	GO:0004721	phosphoprotein phosphatase activity	GO_REF:0000043	IEA	molecular_function	taxon:9823	20230703
Q2EHH7	PPP1CC	GO:0005654	nucleoplasm	GO_REF:0000044	IEA	cellular_component	taxon:9823	20230703
Q2EHH7	PPP1CC	GO:0016787	hydrolase activity	GO_REF:0000043	IEA	molecular_function	taxon:9823	20230703
Q2EHH7	PPP1CC	GO:0005977	glycogen metabolic process	GO_REF:0000043	IEA	biological_process	taxon:9823	20230703
Q2EHH7	PPP1CC	GO:0005975	carbohydrate metabolic process	GO_REF:0000043	IEA	biological_process	taxon:9823	20230703
Q2EHH7	PPP1CC	GO:0005730	nucleolus	GO_REF:0000044	IEA	cellular_component	taxon:9823	20230703
Q2EHH7	PPP1CC	GO:0016787	hydrolase activity	GO_REF:0000002	IEA	molecular_function	taxon:9823	20230703
F1SGM1	PSME1	GO:0000502	proteasome complex	GO_REF:0000043	IEA	cellular_component	taxon:9823	20230703
F1SGM1	PSME1	GO:0008537	proteasome activator complex	GO_REF:0000002	IEA	cellular_component	taxon:9823	20230703
F1SGM1	PSME1	GO:0005654	nucleoplasm	PMID:21873635	IBA	cellular_component	taxon:9823	20170228
F1SGM1	PSME1	GO:0061133	endopeptidase activator activity	GO_REF:0000107	IEA	molecular_function	taxon:9823	20230703
F1SGM1	PSME1	GO:0019884	antigen processing and presentation of exogenous antigen	GO_REF:0000107	IEA	biological_process	taxon:9823	20230703
F1SGM1	PSME1	GO:0005737	cytoplasm	PMID:21873635	IBA	cellular_component	taxon:9823	20170228
F1SGM1	PSME1	GO:0061136	regulation of proteasomal protein catabolic process	PMID:21873635	IBA	biological_process	taxon:9823	20230109
F1SGM1	PSME1	GO:2000045	regulation of G1/S transition of mitotic cell cycle	PMID:21873635	IBA	biological_process	taxon:9823	20170228
F1SGM1	PSME1	GO:0061133	endopeptidase activator activity	PMID:21873635	IBA	molecular_function	taxon:9823	20230109
A0A8W4FH32	GART	GO:0009113	purine nucleobase biosynthetic process	GO_REF:0000002	IEA	biological_process	taxon:9823	20230703
A0A8W4FH32	GART	GO:0004637	phosphoribosylamine-glycine ligase activity	GO_REF:0000002	IEA	molecular_function	taxon:9823	20230703
A0A8W4FH32	GART	GO:0005524	ATP binding	GO_REF:0000002	IEA	molecular_function	taxon:9823	20230703
A0A8W4FH32	GART	GO:0005524	ATP binding	GO_REF:0000043	IEA	molecular_function	taxon:9823	20230703
A0A8W4FH32	GART	GO:0046872	metal ion binding	GO_REF:0000002	IEA	molecular_function	taxon:9823	20230703
A0A8W4FH32	GART	GO:0005524	ATP binding	GO_REF:0000104	IEA	molecular_function	taxon:9823	20230703
A0A8W4FH32	GART	GO:0006164	purine nucleotide biosynthetic process	GO_REF:0000043	IEA	biological_process	taxon:9823	20230703
A0A8W4FH32	GART	GO:0000166	nucleotide binding	GO_REF:0000043	IEA	molecular_function	taxon:9823	20230703
A0A8W4FH32	GART	GO:0000166	nucleotide binding	GO_REF:0000104	IEA	molecular_function	taxon:9823	20230703
A0A8W4FH32	GART	GO:0016874	ligase activity	GO_REF:0000043	IEA	molecular_function	taxon:9823	20230703
Q29011	ACAN	GO:0072534	perineuronal net	PMID:21873635	IBA	cellular_component	taxon:9823	20230111
Q29011	ACAN	GO:0010001	glial cell differentiation	PMID:21873635	IBA	biological_process	taxon:9823	20221209
Q29011	ACAN	GO:0005540	hyaluronic acid binding	GO_REF:0000002	IEA	molecular_function	taxon:9823	20230703
Q29011	ACAN	GO:0005576	extracellular region	GO_REF:0000043	IEA	cellular_component	taxon:9823	20230703
Q29011	ACAN	GO:0005576	extracellular region	Reactome:R-NUL-3814821	TAS	cellular_component	taxon:9823	20130828
Q29011	ACAN	GO:0005615	extracellular space	PMID:21873635	IBA	cellular_component	taxon:9823	20221209
Q29011	ACAN	GO:0001501	skeletal system development	PMID:21873635	IBA	biological_process	taxon:9823	20200808
Q29011	ACAN	GO:0045202	synapse	PMID:21873635	IBA	cellular_component	taxon:9823	20230603
Q29011	ACAN	GO:0007155	cell adhesion	GO_REF:0000002	IEA	biological_process	taxon:9823	20230703
Q29011	ACAN	GO:0007417	central nervous system development	PMID:21873635	IBA	biological_process	taxon:9823	20230603
Q29011	ACAN	GO:0002052	positive regulation of neuroblast proliferation	PMID:21873635	IBA	biological_process	taxon:9823	20221209
F1SQ08	KERA	GO:0005615	extracellular space	PMID:21873635	IBA	cellular_component	taxon:9823	20191217
F1SQ08	KERA	GO:0061303	cornea development in camera-type eye	GO_REF:0000107	IEA	biological_process	taxon:9823	20230703
I3LIK1	EPM2AIP1	GO:0032868	response to insulin	GO_REF:0000107	IEA	biological_process	taxon:9823	20230703
I3LIK1	EPM2AIP1	GO:0005737	cytoplasm	GO_REF:0000107	IEA	cellular_component	taxon:9823	20230703
I3LIK1	EPM2AIP1	GO:0005634	nucleus	GO_REF:0000107	IEA	cellular_component	taxon:9823	20230703
I3LIK1	EPM2AIP1	GO:0042802	identical protein binding	GO_REF:0000107	IEA	molecular_function	taxon:9823	20230703
I3LIK1	EPM2AIP1	GO:0045725	positive regulation of glycogen biosynthetic process	GO_REF:0000107	IEA	biological_process	taxon:9823	20230703
I3LIK1	EPM2AIP1	GO:0005978	glycogen biosynthetic process	GO_REF:0000107	IEA	biological_process	taxon:9823	20230703
I3LIK1	EPM2AIP1	GO:0098554	cytoplasmic side of endoplasmic reticulum membrane	GO_REF:0000107	IEA	cellular_component	taxon:9823	20230703
A0A8D1KXA4	ITGB1	GO:0042470	melanosome	GO_REF:0000044	IEA	cellular_component	taxon:9823	20230703
A0A8D1KXA4	ITGB1	GO:0042995	cell projection	GO_REF:0000044	IEA	cellular_component	taxon:9823	20230703
A0A8D1KXA4	ITGB1	GO:0007229	integrin-mediated signaling pathway	GO_REF:0000043	IEA	biological_process	taxon:9823	20230703
A0A8D1KXA4	ITGB1	GO:0070161	anchoring junction	GO_REF:0000043	IEA	cellular_component	taxon:9823	20230703
A0A8D1KXA4	ITGB1	GO:0007155	cell adhesion	GO_REF:0000117	IEA	biological_process	taxon:9823	20230703
A0A8D1KXA4	ITGB1	GO:0032587	ruffle membrane	GO_REF:0000044	IEA	cellular_component	taxon:9823	20230703
A0A8D1KXA4	ITGB1	GO:0030027	lamellipodium	GO_REF:0000044	IEA	cellular_component	taxon:9823	20230703
A0A8D1KXA4	ITGB1	GO:0016020	membrane	GO_REF:0000043	IEA	cellular_component	taxon:9823	20230703
A0A8D1KXA4	ITGB1	GO:0007517	muscle organ development	GO_REF:0000043	IEA	biological_process	taxon:9823	20230703
A0A8D1KXA4	ITGB1	GO:0016020	membrane	GO_REF:0000044	IEA	cellular_component	taxon:9823	20230703
A0A8D1KXA4	ITGB1	GO:0008305	integrin complex	GO_REF:0000117	IEA	cellular_component	taxon:9823	20230703
A0A8D1KXA4	ITGB1	GO:0009986	cell surface	GO_REF:0000044	IEA	cellular_component	taxon:9823	20230703
A0A8D1KXA4	ITGB1	GO:0007155	cell adhesion	GO_REF:0000043	IEA	biological_process	taxon:9823	20230703
A0A8D1KXA4	ITGB1	GO:0005768	endosome	GO_REF:0000043	IEA	cellular_component	taxon:9823	20230703
A0A8D1KXA4	ITGB1	GO:0055037	recycling endosome	GO_REF:0000044	IEA	cellular_component	taxon:9823	20230703
A0A8D1KXA4	ITGB1	GO:0030054	cell junction	GO_REF:0000117	IEA	cellular_component	taxon:9823	20230703
I3LIM2	UGDH	GO:0001702	gastrulation with mouth forming second	GO_REF:0000107	IEA	biological_process	taxon:9823	20230703
I3LIM2	UGDH	GO:0005634	nucleus	PMID:21873635	IBA	cellular_component	taxon:9823	20210904
I3LIM2	UGDH	GO:0005975	carbohydrate metabolic process	GO_REF:0000043	IEA	biological_process	taxon:9823	20230703
I3LIM2	UGDH	GO:0003979	UDP-glucose 6-dehydrogenase activity	GO_REF:0000003	IEA	molecular_function	taxon:9823	20230703
I3LIM2	UGDH	GO:0042802	identical protein binding	GO_REF:0000107	IEA	molecular_function	taxon:9823	20230703
I3LIM2	UGDH	GO:0006024	glycosaminoglycan biosynthetic process	PMID:21873635	IBA	biological_process	taxon:9823	20170228
I3LIM2	UGDH	GO:0016491	oxidoreductase activity	GO_REF:0000043	IEA	molecular_function	taxon:9823	20230703
I3LIM2	UGDH	GO:0016616	oxidoreductase activity, acting on the CH-OH group of donors, NAD or NADP as acceptor	GO_REF:0000002	IEA	molecular_function	taxon:9823	20230703
I3LIM2	UGDH	GO:0030206	chondroitin sulfate biosynthetic process	GO_REF:0000107	IEA	biological_process	taxon:9823	20230703
I3LIM2	UGDH	GO:0003979	UDP-glucose 6-dehydrogenase activity	GO_REF:0000107	IEA	molecular_function	taxon:9823	20230703
I3LIM2	UGDH	GO:0048666	neuron development	GO_REF:0000107	IEA	biological_process	taxon:9823	20230703
I3LIM2	UGDH	GO:0034214	protein hexamerization	GO_REF:0000107	IEA	biological_process	taxon:9823	20230703
I3LIM2	UGDH	GO:0006065	UDP-glucuronate biosynthetic process	GO_REF:0000041	IEA	biological_process	taxon:9823	20230703
I3LIM2	UGDH	GO:0005654	nucleoplasm	GO_REF:0000107	IEA	cellular_component	taxon:9823	20230703
I3LIM2	UGDH	GO:0015012	heparan sulfate proteoglycan biosynthetic process	GO_REF:0000107	IEA	biological_process	taxon:9823	20230703
I3LIM2	UGDH	GO:0006065	UDP-glucuronate biosynthetic process	GO_REF:0000107	IEA	biological_process	taxon:9823	20230703
I3LIM2	UGDH	GO:0003979	UDP-glucose 6-dehydrogenase activity	GO_REF:0000002	IEA	molecular_function	taxon:9823	20230703
I3LIM2	UGDH	GO:0003979	UDP-glucose 6-dehydrogenase activity	GO_REF:0000117	IEA	molecular_function	taxon:9823	20230703
I3LIM2	UGDH	GO:0051287	NAD binding	GO_REF:0000002	IEA	molecular_function	taxon:9823	20230703
A0A4X1WA57	A0A4X1WA57	GO:0000166	nucleotide binding	GO_REF:0000104	IEA	molecular_function	taxon:9823	20230703
A0A4X1WA57	A0A4X1WA57	GO:0000166	nucleotide binding	GO_REF:0000043	IEA	molecular_function	taxon:9823	20230703
A0A4X1WA57	A0A4X1WA57	GO:0005524	ATP binding	GO_REF:0000043	IEA	molecular_function	taxon:9823	20230703
A0A4X1WA57	A0A4X1WA57	GO:0005524	ATP binding	GO_REF:0000002	IEA	molecular_function	taxon:9823	20230703
A0A4X1WA57	A0A4X1WA57	GO:0005524	ATP binding	GO_REF:0000104	IEA	molecular_function	taxon:9823	20230703
A0A4X1WA57	A0A4X1WA57	GO:0004672	protein kinase activity	GO_REF:0000002	IEA	molecular_function	taxon:9823	20230703
A0A4X1WA57	A0A4X1WA57	GO:0005737	cytoplasm	GO_REF:0000043	IEA	cellular_component	taxon:9823	20230703
A0A8D0J2X0	A0A8D0J2X0	GO:0005856	cytoskeleton	GO_REF:0000044	IEA	cellular_component	taxon:9823	20230703
A0A8D0J2X0	A0A8D0J2X0	GO:0005523	tropomyosin binding	GO_REF:0000002	IEA	molecular_function	taxon:9823	20230703
A0A8D0J2X0	A0A8D0J2X0	GO:0051694	pointed-end actin filament capping	GO_REF:0000002	IEA	biological_process	taxon:9823	20230703
F1RU33	BANF1	GO:0045071	negative regulation of viral genome replication	GO_REF:0000107	IEA	biological_process	taxon:9823	20230703
F1RU33	BANF1	GO:0042803	protein homodimerization activity	GO_REF:0000107	IEA	molecular_function	taxon:9823	20230703
F1RU33	BANF1	GO:0005654	nucleoplasm	GO_REF:0000107	IEA	cellular_component	taxon:9823	20230703
F1RU33	BANF1	GO:0003677	DNA binding	GO_REF:0000107	IEA	molecular_function	taxon:9823	20230703
F1RU33	BANF1	GO:0045824	negative regulation of innate immune response	GO_REF:0000107	IEA	biological_process	taxon:9823	20230703
F1RU33	BANF1	GO:0000793	condensed chromosome	GO_REF:0000107	IEA	cellular_component	taxon:9823	20230703
F1RU33	BANF1	GO:0000785	chromatin	GO_REF:0000107	IEA	cellular_component	taxon:9823	20230703
F1RU33	BANF1	GO:0003690	double-stranded DNA binding	GO_REF:0000107	IEA	molecular_function	taxon:9823	20230703
F1RU33	BANF1	GO:0042802	identical protein binding	GO_REF:0000107	IEA	molecular_function	taxon:9823	20230703
F1RU33	BANF1	GO:0005737	cytoplasm	GO_REF:0000107	IEA	cellular_component	taxon:9823	20230703
F1RU33	BANF1	GO:0006979	response to oxidative stress	GO_REF:0000107	IEA	biological_process	taxon:9823	20230703
F1RU33	BANF1	GO:0005829	cytosol	GO_REF:0000107	IEA	cellular_component	taxon:9823	20230703
F1RU33	BANF1	GO:0003677	DNA binding	GO_REF:0000002	IEA	molecular_function	taxon:9823	20230703
F1RU33	BANF1	GO:0032480	negative regulation of type I interferon production	GO_REF:0000107	IEA	biological_process	taxon:9823	20230703
F1RU33	BANF1	GO:0015074	DNA integration	GO_REF:0000107	IEA	biological_process	taxon:9823	20230703
F1RU33	BANF1	GO:0005634	nucleus	GO_REF:0000107	IEA	cellular_component	taxon:9823	20230703
F1RU33	BANF1	GO:0006325	chromatin organization	GO_REF:0000107	IEA	biological_process	taxon:9823	20230703
F1RU33	BANF1	GO:0005634	nucleus	GO_REF:0000044	IEA	cellular_component	taxon:9823	20230703
F1RU33	BANF1	GO:0007084	mitotic nuclear membrane reassembly	GO_REF:0000107	IEA	biological_process	taxon:9823	20230703
A0A287A3K9	A0A8D1HNZ9	GO:0003924	GTPase activity	GO_REF:0000002	IEA	molecular_function	taxon:9823	20230703
A0A287A3K9	A0A8D1HNZ9	GO:0005815	microtubule organizing center	GO_REF:0000044	IEA	cellular_component	taxon:9823	20230703
A0A287A3K9	A0A8D1HNZ9	GO:0005856	cytoskeleton	GO_REF:0000043	IEA	cellular_component	taxon:9823	20230703
A0A287A3K9	A0A8D1HNZ9	GO:0005525	GTP binding	GO_REF:0000002	IEA	molecular_function	taxon:9823	20230703
A0A287A3K9	A0A8D1HNZ9	GO:0005525	GTP binding	GO_REF:0000043	IEA	molecular_function	taxon:9823	20230703
A0A287A3K9	A0A8D1HNZ9	GO:0000166	nucleotide binding	GO_REF:0000043	IEA	molecular_function	taxon:9823	20230703
A0A8D1E6E0	A0A8D1E6E0	GO:0016491	oxidoreductase activity	GO_REF:0000002	IEA	molecular_function	taxon:9823	20230703
A0A8D1E6E0	A0A8D1E6E0	GO:0004791	thioredoxin-disulfide reductase activity	GO_REF:0000002	IEA	molecular_function	taxon:9823	20230703
A0A8D1E6E0	A0A8D1E6E0	GO:0098869	cellular oxidant detoxification	GO_REF:0000108	IEA	biological_process	taxon:9823	20230705
A0A8D1E6E0	A0A8D1E6E0	GO:0016491	oxidoreductase activity	GO_REF:0000043	IEA	molecular_function	taxon:9823	20230703
A0A8D1E6E0	A0A8D1E6E0	GO:0016668	oxidoreductase activity, acting on a sulfur group of donors, NAD(P) as acceptor	GO_REF:0000002	IEA	molecular_function	taxon:9823	20230703
A0A8D0Z3F9	A0A8D0Z3F9	GO:0008289	lipid binding	GO_REF:0000043	IEA	molecular_function	taxon:9823	20230703
A0A8D0Z3F9	A0A8D0Z3F9	GO:0016020	membrane	GO_REF:0000044	IEA	cellular_component	taxon:9823	20230703
A0A8D0Z3F9	A0A8D0Z3F9	GO:0005737	cytoplasm	GO_REF:0000002	IEA	cellular_component	taxon:9823	20230703
A0A8D1VSK8	ST13	GO:0046983	protein dimerization activity	GO_REF:0000002	IEA	molecular_function	taxon:9823	20230703
A0A480WXV6	A0A480WXV6	GO:0046872	metal ion binding	GO_REF:0000043	IEA	molecular_function	taxon:9823	20230703
A0A480WXV6	A0A480WXV6	GO:0005509	calcium ion binding	GO_REF:0000002	IEA	molecular_function	taxon:9823	20230703
A0A5G2QXR8	NT5E	GO:0016788	hydrolase activity, acting on ester bonds	GO_REF:0000002	IEA	molecular_function	taxon:9823	20230703
A0A5G2QXR8	NT5E	GO:0016787	hydrolase activity	GO_REF:0000002	IEA	molecular_function	taxon:9823	20230703
A0A5G2QXR8	NT5E	GO:0110165	cellular anatomical entity	GO_REF:0000117	IEA	cellular_component	taxon:9823	20230703
A0A5G2QXR8	NT5E	GO:0000166	nucleotide binding	GO_REF:0000043	IEA	molecular_function	taxon:9823	20230703
A0A5G2QXR8	NT5E	GO:0009166	nucleotide catabolic process	GO_REF:0000002	IEA	biological_process	taxon:9823	20230703
A0A5G2QXR8	NT5E	GO:0008253	5'-nucleotidase activity	GO_REF:0000003	IEA	molecular_function	taxon:9823	20230703
A0A5G2QXR8	NT5E	GO:0046872	metal ion binding	GO_REF:0000002	IEA	molecular_function	taxon:9823	20230703
A0A5G2QXR8	NT5E	GO:0000166	nucleotide binding	GO_REF:0000002	IEA	molecular_function	taxon:9823	20230703
A0A5G2QXR8	NT5E	GO:0016787	hydrolase activity	GO_REF:0000043	IEA	molecular_function	taxon:9823	20230703
A0A5G2QXR8	NT5E	GO:0008252	nucleotidase activity	GO_REF:0000117	IEA	molecular_function	taxon:9823	20230703
A0A5G2QXR8	NT5E	GO:0016020	membrane	GO_REF:0000044	IEA	cellular_component	taxon:9823	20230703
A0A5G2QXR8	NT5E	GO:0106411	XMP 5'-nucleosidase activity	GO_REF:0000003	IEA	molecular_function	taxon:9823	20230703
A0A5G2QXR8	NT5E	GO:0098552	side of membrane	GO_REF:0000043	IEA	cellular_component	taxon:9823	20230703
D0G780	NANS	GO:0016051	carbohydrate biosynthetic process	GO_REF:0000002	IEA	biological_process	taxon:9823	20230703
A0A480YZR2	A0A480YZR2	GO:0016020	membrane	GO_REF:0000043	IEA	cellular_component	taxon:9823	20230703
F1SUE2	OMD	GO:0005615	extracellular space	PMID:21873635	IBA	cellular_component	taxon:9823	20191217
F1SUE2	OMD	GO:0031012	extracellular matrix	GO_REF:0000107	IEA	cellular_component	taxon:9823	20230703
A0A480WUI2	A0A480WUI2	GO:0007166	cell surface receptor signaling pathway	GO_REF:0000002	IEA	biological_process	taxon:9823	20230703
A0A480WUI2	A0A480WUI2	GO:0016310	phosphorylation	GO_REF:0000043	IEA	biological_process	taxon:9823	20230703
A0A480WUI2	A0A480WUI2	GO:0016301	kinase activity	GO_REF:0000043	IEA	molecular_function	taxon:9823	20230703
A0A480WUI2	A0A480WUI2	GO:0005524	ATP binding	GO_REF:0000002	IEA	molecular_function	taxon:9823	20230703
A0A480WUI2	A0A480WUI2	GO:0004672	protein kinase activity	GO_REF:0000002	IEA	molecular_function	taxon:9823	20230703
Q9GL64	Tfam	GO:0003677	DNA binding	GO_REF:0000043	IEA	molecular_function	taxon:9823	20230703
Q9GL64	Tfam	GO:0003677	DNA binding	GO_REF:0000104	IEA	molecular_function	taxon:9823	20230703
Q9GL64	Tfam	GO:0005634	nucleus	GO_REF:0000043	IEA	cellular_component	taxon:9823	20230703
Q9GL64	Tfam	GO:0043170	macromolecule metabolic process	GO_REF:0000117	IEA	biological_process	taxon:9823	20230703
Q9GL64	Tfam	GO:0005634	nucleus	GO_REF:0000104	IEA	cellular_component	taxon:9823	20230703
A0A8W4FM11	ATP6V1G1	GO:0016471	vacuolar proton-transporting V-type ATPase complex	GO_REF:0000002	IEA	cellular_component	taxon:9823	20230703
A0A8W4FM11	ATP6V1G1	GO:1902600	proton transmembrane transport	GO_REF:0000002	IEA	biological_process	taxon:9823	20230703
A0A8W4FM11	ATP6V1G1	GO:0046961	proton-transporting ATPase activity, rotational mechanism	GO_REF:0000002	IEA	molecular_function	taxon:9823	20230703
A0A480PIX1	A0A480PIX1	GO:0005694	chromosome	GO_REF:0000044	IEA	cellular_component	taxon:9823	20230703
A0A480PIX1	A0A480PIX1	GO:0005634	nucleus	GO_REF:0000044	IEA	cellular_component	taxon:9823	20230703
A0A480PIX1	A0A480PIX1	GO:0003677	DNA binding	GO_REF:0000043	IEA	molecular_function	taxon:9823	20230703
A0A480PIX1	A0A480PIX1	GO:0000786	nucleosome	GO_REF:0000002	IEA	cellular_component	taxon:9823	20230703
A0A480PIX1	A0A480PIX1	GO:0005634	nucleus	GO_REF:0000043	IEA	cellular_component	taxon:9823	20230703
A0A480PIX1	A0A480PIX1	GO:0000786	nucleosome	GO_REF:0000043	IEA	cellular_component	taxon:9823	20230703
A0A480PIX1	A0A480PIX1	GO:0003677	DNA binding	GO_REF:0000002	IEA	molecular_function	taxon:9823	20230703
A0A480PIX1	A0A480PIX1	GO:0005694	chromosome	GO_REF:0000043	IEA	cellular_component	taxon:9823	20230703
A0A480PIX1	A0A480PIX1	GO:0030527	structural constituent of chromatin	GO_REF:0000002	IEA	molecular_function	taxon:9823	20230703
A0A480PIX1	A0A480PIX1	GO:0046982	protein heterodimerization activity	GO_REF:0000002	IEA	molecular_function	taxon:9823	20230703
A0A8D1QD46	A0A8D1QD46	GO:0098655	monoatomic cation transmembrane transport	GO_REF:0000108	IEA	biological_process	taxon:9823	20230705
A0A8D1QD46	A0A8D1QD46	GO:0016020	membrane	GO_REF:0000043	IEA	cellular_component	taxon:9823	20230703
A0A8D1QD46	A0A8D1QD46	GO:0005886	plasma membrane	GO_REF:0000043	IEA	cellular_component	taxon:9823	20230703
A0A8D1QD46	A0A8D1QD46	GO:0016020	membrane	GO_REF:0000044	IEA	cellular_component	taxon:9823	20230703
A0A8D1QD46	A0A8D1QD46	GO:0010008	endosome membrane	GO_REF:0000044	IEA	cellular_component	taxon:9823	20230703
A0A8D1QD46	A0A8D1QD46	GO:0005261	monoatomic cation channel activity	GO_REF:0000002	IEA	molecular_function	taxon:9823	20230703
A0A8D0N2H2	A0A8D0N2H2	GO:0032991	protein-containing complex	GO_REF:0000117	IEA	cellular_component	taxon:9823	20230703
A0A8D0N2H2	A0A8D0N2H2	GO:0008233	peptidase activity	GO_REF:0000002	IEA	molecular_function	taxon:9823	20230703
A0A8D0N2H2	A0A8D0N2H2	GO:0008237	metallopeptidase activity	GO_REF:0000002	IEA	molecular_function	taxon:9823	20230703
A0A5K1VU77	PPIH	GO:0003755	peptidyl-prolyl cis-trans isomerase activity	GO_REF:0000116	IEA	molecular_function	taxon:9823	20230703
A0A5K1VU77	PPIH	GO:0006457	protein folding	GO_REF:0000002	IEA	biological_process	taxon:9823	20230703
A0A5K1VU77	PPIH	GO:0003755	peptidyl-prolyl cis-trans isomerase activity	GO_REF:0000104	IEA	molecular_function	taxon:9823	20230703
A0A5K1VU77	PPIH	GO:0003755	peptidyl-prolyl cis-trans isomerase activity	GO_REF:0000002	IEA	molecular_function	taxon:9823	20230703
A0A5K1VU77	PPIH	GO:0003755	peptidyl-prolyl cis-trans isomerase activity	GO_REF:0000003	IEA	molecular_function	taxon:9823	20230703
A0A5K1VU77	PPIH	GO:0003755	peptidyl-prolyl cis-trans isomerase activity	GO_REF:0000043	IEA	molecular_function	taxon:9823	20230703
A0A5K1VU77	PPIH	GO:0016853	isomerase activity	GO_REF:0000043	IEA	molecular_function	taxon:9823	20230703
A0A286ZMW9	TPD52L2	GO:0110165	cellular anatomical entity	GO_REF:0000117	IEA	cellular_component	taxon:9823	20230703
A0A8D0IE58	A0A8D0IE58	GO:0016020	membrane	GO_REF:0000043	IEA	cellular_component	taxon:9823	20230703
A0A8D0VHQ3	A0A8D0VHQ3	GO:0006378	mRNA polyadenylation	GO_REF:0000104	IEA	biological_process	taxon:9823	20230703
A0A8D0VHQ3	A0A8D0VHQ3	GO:0003729	mRNA binding	GO_REF:0000104	IEA	molecular_function	taxon:9823	20230703
A0A8D0VHQ3	A0A8D0VHQ3	GO:0005737	cytoplasm	GO_REF:0000044	IEA	cellular_component	taxon:9823	20230703
A0A8D0VHQ3	A0A8D0VHQ3	GO:0003723	RNA binding	GO_REF:0000043	IEA	molecular_function	taxon:9823	20230703
A0A8D0VHQ3	A0A8D0VHQ3	GO:0003729	mRNA binding	GO_REF:0000002	IEA	molecular_function	taxon:9823	20230703
A0A8D0VHQ3	A0A8D0VHQ3	GO:0005634	nucleus	GO_REF:0000043	IEA	cellular_component	taxon:9823	20230703
A0A8D0VHQ3	A0A8D0VHQ3	GO:0006378	mRNA polyadenylation	GO_REF:0000002	IEA	biological_process	taxon:9823	20230703
A0A8D0VHQ3	A0A8D0VHQ3	GO:0005849	mRNA cleavage factor complex	GO_REF:0000104	IEA	cellular_component	taxon:9823	20230703
A0A8D0VHQ3	A0A8D0VHQ3	GO:0005634	nucleus	GO_REF:0000044	IEA	cellular_component	taxon:9823	20230703
A0A8D0VHQ3	A0A8D0VHQ3	GO:0005634	nucleus	GO_REF:0000104	IEA	cellular_component	taxon:9823	20230703
A0A8D0VHQ3	A0A8D0VHQ3	GO:0006397	mRNA processing	GO_REF:0000104	IEA	biological_process	taxon:9823	20230703
A0A8D0VHQ3	A0A8D0VHQ3	GO:0005849	mRNA cleavage factor complex	GO_REF:0000002	IEA	cellular_component	taxon:9823	20230703
A0A8D0VHQ3	A0A8D0VHQ3	GO:0005737	cytoplasm	GO_REF:0000043	IEA	cellular_component	taxon:9823	20230703
A0A8D0VHQ3	A0A8D0VHQ3	GO:0005737	cytoplasm	GO_REF:0000104	IEA	cellular_component	taxon:9823	20230703
A0A8D0VHQ3	A0A8D0VHQ3	GO:0006397	mRNA processing	GO_REF:0000043	IEA	biological_process	taxon:9823	20230703
A0A480QX91	A0A480QX91	GO:0045087	innate immune response	GO_REF:0000043	IEA	biological_process	taxon:9823	20230703
A0A480QX91	A0A480QX91	GO:0005581	collagen trimer	GO_REF:0000043	IEA	cellular_component	taxon:9823	20230703
A0A480QX91	A0A480QX91	GO:0002376	immune system process	GO_REF:0000043	IEA	biological_process	taxon:9823	20230703
A0A480QX91	A0A480QX91	GO:0110165	cellular anatomical entity	GO_REF:0000117	IEA	cellular_component	taxon:9823	20230703
A0A8D1R2R2	AK1	GO:0046034	ATP metabolic process	GO_REF:0000002	IEA	biological_process	taxon:9823	20230703
A0A8D1R2R2	AK1	GO:0046034	ATP metabolic process	GO_REF:0000104	IEA	biological_process	taxon:9823	20230703
A0A8D1R2R2	AK1	GO:0005737	cytoplasm	GO_REF:0000044	IEA	cellular_component	taxon:9823	20230703
A0A8D1R2R2	AK1	GO:0005524	ATP binding	GO_REF:0000002	IEA	molecular_function	taxon:9823	20230703
A0A8D1R2R2	AK1	GO:0046940	nucleoside monophosphate phosphorylation	GO_REF:0000108	IEA	biological_process	taxon:9823	20230705
A0A8D1R2R2	AK1	GO:0046033	AMP metabolic process	GO_REF:0000104	IEA	biological_process	taxon:9823	20230703
A0A8D1R2R2	AK1	GO:0016310	phosphorylation	GO_REF:0000043	IEA	biological_process	taxon:9823	20230703
A0A8D1R2R2	AK1	GO:0006139	nucleobase-containing compound metabolic process	GO_REF:0000002	IEA	biological_process	taxon:9823	20230703
A0A8D1R2R2	AK1	GO:0004017	adenylate kinase activity	GO_REF:0000002	IEA	molecular_function	taxon:9823	20230703
A0A8D1R2R2	AK1	GO:0019205	nucleobase-containing compound kinase activity	GO_REF:0000002	IEA	molecular_function	taxon:9823	20230703
A0A8D1R2R2	AK1	GO:0004017	adenylate kinase activity	GO_REF:0000104	IEA	molecular_function	taxon:9823	20230703
A0A8D1R2R2	AK1	GO:0005737	cytoplasm	GO_REF:0000104	IEA	cellular_component	taxon:9823	20230703
A0A8D1R2R2	AK1	GO:0016740	transferase activity	GO_REF:0000043	IEA	molecular_function	taxon:9823	20230703
A0A8D1R2R2	AK1	GO:0009142	nucleoside triphosphate biosynthetic process	GO_REF:0000002	IEA	biological_process	taxon:9823	20230703
A0A8D1R2R2	AK1	GO:0005737	cytoplasm	GO_REF:0000002	IEA	cellular_component	taxon:9823	20230703
A0A8D1R2R2	AK1	GO:0000166	nucleotide binding	GO_REF:0000043	IEA	molecular_function	taxon:9823	20230703
A0A8D1R2R2	AK1	GO:0005524	ATP binding	GO_REF:0000043	IEA	molecular_function	taxon:9823	20230703
A0A8D1R2R2	AK1	GO:0006172	ADP biosynthetic process	GO_REF:0000104	IEA	biological_process	taxon:9823	20230703
A0A8D1R2R2	AK1	GO:0005737	cytoplasm	GO_REF:0000043	IEA	cellular_component	taxon:9823	20230703
A0A8D1R2R2	AK1	GO:0004550	nucleoside diphosphate kinase activity	GO_REF:0000002	IEA	molecular_function	taxon:9823	20230703
A0A8D1R2R2	AK1	GO:0016301	kinase activity	GO_REF:0000043	IEA	molecular_function	taxon:9823	20230703
A0A8D1R2R2	AK1	GO:0004017	adenylate kinase activity	GO_REF:0000117	IEA	molecular_function	taxon:9823	20230703
A0A8D0QCH4	PGM1	GO:0005975	carbohydrate metabolic process	GO_REF:0000043	IEA	biological_process	taxon:9823	20230703
A0A8D0QCH4	PGM1	GO:0004614	phosphoglucomutase activity	GO_REF:0000117	IEA	molecular_function	taxon:9823	20230703
A0A8D0QCH4	PGM1	GO:0000287	magnesium ion binding	GO_REF:0000002	IEA	molecular_function	taxon:9823	20230703
A0A8D0QCH4	PGM1	GO:0004614	phosphoglucomutase activity	GO_REF:0000002	IEA	molecular_function	taxon:9823	20230703
A0A8D0QCH4	PGM1	GO:0046872	metal ion binding	GO_REF:0000043	IEA	molecular_function	taxon:9823	20230703
A0A8D0QCH4	PGM1	GO:0071704	organic substance metabolic process	GO_REF:0000002	IEA	biological_process	taxon:9823	20230703
A0A8D0QCH4	PGM1	GO:0005975	carbohydrate metabolic process	GO_REF:0000002	IEA	biological_process	taxon:9823	20230703
A0A8D0QCH4	PGM1	GO:0016853	isomerase activity	GO_REF:0000043	IEA	molecular_function	taxon:9823	20230703
A0A8D0QCH4	PGM1	GO:0016868	intramolecular transferase activity, phosphotransferases	GO_REF:0000002	IEA	molecular_function	taxon:9823	20230703
A0A8D1DWR8	AOC2	GO:0046872	metal ion binding	GO_REF:0000043	IEA	molecular_function	taxon:9823	20230703
A0A8D1DWR8	AOC2	GO:0016491	oxidoreductase activity	GO_REF:0000043	IEA	molecular_function	taxon:9823	20230703
A0A8D1DWR8	AOC2	GO:0048038	quinone binding	GO_REF:0000002	IEA	molecular_function	taxon:9823	20230703
A0A8D1DWR8	AOC2	GO:0016491	oxidoreductase activity	GO_REF:0000117	IEA	molecular_function	taxon:9823	20230703
A0A8D1DWR8	AOC2	GO:0009308	amine metabolic process	GO_REF:0000104	IEA	biological_process	taxon:9823	20230703
A0A8D1DWR8	AOC2	GO:0008131	primary amine oxidase activity	GO_REF:0000002	IEA	molecular_function	taxon:9823	20230703
A0A8D1DWR8	AOC2	GO:0005507	copper ion binding	GO_REF:0000002	IEA	molecular_function	taxon:9823	20230703
A0A8D1DWR8	AOC2	GO:0009308	amine metabolic process	GO_REF:0000002	IEA	biological_process	taxon:9823	20230703
A0A481C3R6	A0A481C3R6	GO:0030623	U5 snRNA binding	GO_REF:0000002	IEA	molecular_function	taxon:9823	20230703
A0A481C3R6	A0A481C3R6	GO:0003723	RNA binding	GO_REF:0000002	IEA	molecular_function	taxon:9823	20230703
A0A481C3R6	A0A481C3R6	GO:0000398	mRNA splicing, via spliceosome	GO_REF:0000002	IEA	biological_process	taxon:9823	20230703
A0A481C3R6	A0A481C3R6	GO:0017070	U6 snRNA binding	GO_REF:0000002	IEA	molecular_function	taxon:9823	20230703
A0A481C3R6	A0A481C3R6	GO:0005681	spliceosomal complex	GO_REF:0000002	IEA	cellular_component	taxon:9823	20230703
A0A8D1UA75	A0A8D1UA75	GO:0051082	unfolded protein binding	GO_REF:0000002	IEA	molecular_function	taxon:9823	20230703
A0A8D1UA75	A0A8D1UA75	GO:0006457	protein folding	GO_REF:0000002	IEA	biological_process	taxon:9823	20230703
A0A8D0W2W8	A0A8D0W2W8	GO:0046872	metal ion binding	GO_REF:0000043	IEA	molecular_function	taxon:9823	20230703
A0A8D0W2W8	A0A8D0W2W8	GO:0005509	calcium ion binding	GO_REF:0000002	IEA	molecular_function	taxon:9823	20230703
A0A5K1U589	UBA1	GO:0016567	protein ubiquitination	GO_REF:0000041	IEA	biological_process	taxon:9823	20230703
A0A5K1U589	UBA1	GO:0030057	desmosome	GO_REF:0000107	IEA	cellular_component	taxon:9823	20230703
A0A5K1U589	UBA1	GO:0005739	mitochondrion	GO_REF:0000107	IEA	cellular_component	taxon:9823	20230703
A0A5K1U589	UBA1	GO:0005737	cytoplasm	GO_REF:0000107	IEA	cellular_component	taxon:9823	20230703
A0A5K1U589	UBA1	GO:0000792	heterochromatin	GO_REF:0000107	IEA	cellular_component	taxon:9823	20230703
A0A5K1U589	UBA1	GO:0000166	nucleotide binding	GO_REF:0000043	IEA	molecular_function	taxon:9823	20230703
A0A5K1U589	UBA1	GO:0016567	protein ubiquitination	PMID:21873635	IBA	biological_process	taxon:9823	20230110
A0A5K1U589	UBA1	GO:0006511	ubiquitin-dependent protein catabolic process	PMID:21873635	IBA	biological_process	taxon:9823	20211110
A0A5K1U589	UBA1	GO:0030867	rough endoplasmic reticulum membrane	GO_REF:0000107	IEA	cellular_component	taxon:9823	20230703
A0A5K1U589	UBA1	GO:0010008	endosome membrane	GO_REF:0000107	IEA	cellular_component	taxon:9823	20230703
A0A5K1U589	UBA1	GO:0016874	ligase activity	GO_REF:0000043	IEA	molecular_function	taxon:9823	20230703
A0A5K1U589	UBA1	GO:0005737	cytoplasm	PMID:21873635	IBA	cellular_component	taxon:9823	20230405
A0A5K1U589	UBA1	GO:0036211	protein modification process	GO_REF:0000002	IEA	biological_process	taxon:9823	20230703
A0A5K1U589	UBA1	GO:0008641	ubiquitin-like modifier activating enzyme activity	GO_REF:0000117	IEA	molecular_function	taxon:9823	20230703
A0A5K1U589	UBA1	GO:0004839	ubiquitin activating enzyme activity	GO_REF:0000003	IEA	molecular_function	taxon:9823	20230703
A0A5K1U589	UBA1	GO:0004839	ubiquitin activating enzyme activity	GO_REF:0000107	IEA	molecular_function	taxon:9823	20230703
A0A5K1U589	UBA1	GO:0005829	cytosol	GO_REF:0000107	IEA	cellular_component	taxon:9823	20230703
A0A5K1U589	UBA1	GO:0032446	protein modification by small protein conjugation	GO_REF:0000117	IEA	biological_process	taxon:9823	20230703
A0A5K1U589	UBA1	GO:0006974	cellular response to DNA damage stimulus	GO_REF:0000107	IEA	biological_process	taxon:9823	20230703
A0A5K1U589	UBA1	GO:0006974	cellular response to DNA damage stimulus	PMID:21873635	IBA	biological_process	taxon:9823	20170228
A0A5K1U589	UBA1	GO:0008641	ubiquitin-like modifier activating enzyme activity	GO_REF:0000002	IEA	molecular_function	taxon:9823	20230703
A0A5K1U589	UBA1	GO:0005634	nucleus	PMID:21873635	IBA	cellular_component	taxon:9823	20230110
A0A5K1U589	UBA1	GO:0005524	ATP binding	GO_REF:0000043	IEA	molecular_function	taxon:9823	20230703
A0A5K1U589	UBA1	GO:0005634	nucleus	GO_REF:0000107	IEA	cellular_component	taxon:9823	20230703
A0A5K1U589	UBA1	GO:0005765	lysosomal membrane	GO_REF:0000107	IEA	cellular_component	taxon:9823	20230703
A0A5K1U589	UBA1	GO:0005654	nucleoplasm	GO_REF:0000107	IEA	cellular_component	taxon:9823	20230703
A0A5K1U589	UBA1	GO:0004839	ubiquitin activating enzyme activity	PMID:21873635	IBA	molecular_function	taxon:9823	20230110
A0A287BSL9	G6PD	GO:0016491	oxidoreductase activity	GO_REF:0000043	IEA	molecular_function	taxon:9823	20230703
A0A287BSL9	G6PD	GO:0034451	centriolar satellite	GO_REF:0000107	IEA	cellular_component	taxon:9823	20230703
A0A287BSL9	G6PD	GO:0043231	intracellular membrane-bounded organelle	GO_REF:0000107	IEA	cellular_component	taxon:9823	20230703
A0A287BSL9	G6PD	GO:0046390	ribose phosphate biosynthetic process	GO_REF:0000107	IEA	biological_process	taxon:9823	20230703
A0A287BSL9	G6PD	GO:0050661	NADP binding	GO_REF:0000107	IEA	molecular_function	taxon:9823	20230703
A0A287BSL9	G6PD	GO:0009898	cytoplasmic side of plasma membrane	GO_REF:0000107	IEA	cellular_component	taxon:9823	20230703
A0A287BSL9	G6PD	GO:0006006	glucose metabolic process	PMID:21873635	IBA	biological_process	taxon:9823	20211011
A0A287BSL9	G6PD	GO:0005737	cytoplasm	GO_REF:0000107	IEA	cellular_component	taxon:9823	20230703
A0A287BSL9	G6PD	GO:0050661	NADP binding	GO_REF:0000002	IEA	molecular_function	taxon:9823	20230703
A0A287BSL9	G6PD	GO:0004345	glucose-6-phosphate dehydrogenase activity	GO_REF:0000107	IEA	molecular_function	taxon:9823	20230703
A0A287BSL9	G6PD	GO:0009051	pentose-phosphate shunt, oxidative branch	PMID:21873635	IBA	biological_process	taxon:9823	20220924
A0A287BSL9	G6PD	GO:0009051	pentose-phosphate shunt, oxidative branch	GO_REF:0000107	IEA	biological_process	taxon:9823	20230703
A0A287BSL9	G6PD	GO:0019322	pentose biosynthetic process	GO_REF:0000107	IEA	biological_process	taxon:9823	20230703
A0A287BSL9	G6PD	GO:0042803	protein homodimerization activity	GO_REF:0000107	IEA	molecular_function	taxon:9823	20230703
A0A287BSL9	G6PD	GO:0010734	negative regulation of protein glutathionylation	GO_REF:0000107	IEA	biological_process	taxon:9823	20230703
A0A287BSL9	G6PD	GO:0004345	glucose-6-phosphate dehydrogenase activity	GO_REF:0000002	IEA	molecular_function	taxon:9823	20230703
A0A287BSL9	G6PD	GO:0043249	erythrocyte maturation	GO_REF:0000107	IEA	biological_process	taxon:9823	20230703
A0A287BSL9	G6PD	GO:0005829	cytosol	GO_REF:0000107	IEA	cellular_component	taxon:9823	20230703
A0A287BSL9	G6PD	GO:0004345	glucose-6-phosphate dehydrogenase activity	GO_REF:0000117	IEA	molecular_function	taxon:9823	20230703
A0A287BSL9	G6PD	GO:0006098	pentose-phosphate shunt	GO_REF:0000041	IEA	biological_process	taxon:9823	20230703
A0A287BSL9	G6PD	GO:0006006	glucose metabolic process	GO_REF:0000043	IEA	biological_process	taxon:9823	20230703
A0A287BSL9	G6PD	GO:0006098	pentose-phosphate shunt	GO_REF:0000107	IEA	biological_process	taxon:9823	20230703
A0A287BSL9	G6PD	GO:0034599	cellular response to oxidative stress	GO_REF:0000107	IEA	biological_process	taxon:9823	20230703
A0A287BSL9	G6PD	GO:0006006	glucose metabolic process	GO_REF:0000002	IEA	biological_process	taxon:9823	20230703
A0A287BSL9	G6PD	GO:0006695	cholesterol biosynthetic process	GO_REF:0000107	IEA	biological_process	taxon:9823	20230703
A0A287BSL9	G6PD	GO:0006098	pentose-phosphate shunt	GO_REF:0000117	IEA	biological_process	taxon:9823	20230703
A0A287BSL9	G6PD	GO:0016614	oxidoreductase activity, acting on CH-OH group of donors	GO_REF:0000002	IEA	molecular_function	taxon:9823	20230703
A0A287BSL9	G6PD	GO:0006739	NADP metabolic process	GO_REF:0000107	IEA	biological_process	taxon:9823	20230703
A0A287BSL9	G6PD	GO:0004345	glucose-6-phosphate dehydrogenase activity	GO_REF:0000003	IEA	molecular_function	taxon:9823	20230703
A0A287BSL9	G6PD	GO:0005536	glucose binding	GO_REF:0000107	IEA	molecular_function	taxon:9823	20230703
A0A287BSL9	G6PD	GO:0051156	glucose 6-phosphate metabolic process	GO_REF:0000107	IEA	biological_process	taxon:9823	20230703
A0A287BSL9	G6PD	GO:0005975	carbohydrate metabolic process	GO_REF:0000043	IEA	biological_process	taxon:9823	20230703
A0A287BSL9	G6PD	GO:0004345	glucose-6-phosphate dehydrogenase activity	GO_REF:0000116	IEA	molecular_function	taxon:9823	20230703
A0A287BSL9	G6PD	GO:0042802	identical protein binding	GO_REF:0000107	IEA	molecular_function	taxon:9823	20230703
A0A287BSL9	G6PD	GO:0006740	NADPH regeneration	GO_REF:0000107	IEA	biological_process	taxon:9823	20230703
A0A287BSL9	G6PD	GO:0006749	glutathione metabolic process	GO_REF:0000107	IEA	biological_process	taxon:9823	20230703
A0A287BSL9	G6PD	GO:0005829	cytosol	PMID:21873635	IBA	cellular_component	taxon:9823	20230603
A0A8D1NV78	A0A8D1NV78	GO:0005509	calcium ion binding	GO_REF:0000002	IEA	molecular_function	taxon:9823	20230703
A0A8D1NV78	A0A8D1NV78	GO:0005576	extracellular region	GO_REF:0000043	IEA	cellular_component	taxon:9823	20230703
A0A8D1NV78	A0A8D1NV78	GO:0110165	cellular anatomical entity	GO_REF:0000117	IEA	cellular_component	taxon:9823	20230703
A0A8W4FEH2	C1QTNF5	GO:0016328	lateral plasma membrane	GO_REF:0000107	IEA	cellular_component	taxon:9823	20230703
A0A8W4FEH2	C1QTNF5	GO:0045087	innate immune response	GO_REF:0000043	IEA	biological_process	taxon:9823	20230703
A0A8W4FEH2	C1QTNF5	GO:0002376	immune system process	GO_REF:0000043	IEA	biological_process	taxon:9823	20230703
A0A8W4FEH2	C1QTNF5	GO:0005576	extracellular region	GO_REF:0000043	IEA	cellular_component	taxon:9823	20230703
A0A8W4FEH2	C1QTNF5	GO:0016324	apical plasma membrane	GO_REF:0000107	IEA	cellular_component	taxon:9823	20230703
A0A8W4FEH2	C1QTNF5	GO:0042802	identical protein binding	GO_REF:0000107	IEA	molecular_function	taxon:9823	20230703
A0A8W4FEH2	C1QTNF5	GO:0030133	transport vesicle	GO_REF:0000107	IEA	cellular_component	taxon:9823	20230703
A0A8W4FEH2	C1QTNF5	GO:0032991	protein-containing complex	GO_REF:0000107	IEA	cellular_component	taxon:9823	20230703
A0A8W4FEH2	C1QTNF5	GO:0005576	extracellular region	GO_REF:0000107	IEA	cellular_component	taxon:9823	20230703
A0A8W4FEH2	C1QTNF5	GO:0048839	inner ear development	GO_REF:0000107	IEA	biological_process	taxon:9823	20230703
A0A8W4FEH2	C1QTNF5	GO:0005615	extracellular space	GO_REF:0000107	IEA	cellular_component	taxon:9823	20230703
A0A8W4FEH2	C1QTNF5	GO:0009306	protein secretion	GO_REF:0000107	IEA	biological_process	taxon:9823	20230703
A0A8W4FEH2	C1QTNF5	GO:0005923	bicellular tight junction	GO_REF:0000107	IEA	cellular_component	taxon:9823	20230703
A0A8W4FEH2	C1QTNF5	GO:0016020	membrane	GO_REF:0000107	IEA	cellular_component	taxon:9823	20230703
A0A8W4FEH2	C1QTNF5	GO:0005886	plasma membrane	GO_REF:0000107	IEA	cellular_component	taxon:9823	20230703
A0A8W4FEH2	C1QTNF5	GO:0042995	cell projection	GO_REF:0000107	IEA	cellular_component	taxon:9823	20230703
A0A480Z835	A0A480Z835	GO:0016740	transferase activity	GO_REF:0000043	IEA	molecular_function	taxon:9823	20230703
A0A480Z835	A0A480Z835	GO:0003980	UDP-glucose:glycoprotein glucosyltransferase activity	GO_REF:0000002	IEA	molecular_function	taxon:9823	20230703
A0A480Z835	A0A480Z835	GO:0097359	UDP-glucosylation	GO_REF:0000108	IEA	biological_process	taxon:9823	20230705
A0A8D1EY46	A0A8D1EY46	GO:0016791	phosphatase activity	GO_REF:0000002	IEA	molecular_function	taxon:9823	20230703
A0A8D1EY46	A0A8D1EY46	GO:0016020	membrane	GO_REF:0000043	IEA	cellular_component	taxon:9823	20230703
A0A8D1MSD5	A0A8D1MSD5	GO:0016020	membrane	GO_REF:0000002	IEA	cellular_component	taxon:9823	20230703
A0A8D1MSD5	A0A8D1MSD5	GO:0005886	plasma membrane	GO_REF:0000002	IEA	cellular_component	taxon:9823	20230703
A0A8D1MSD5	A0A8D1MSD5	GO:0110165	cellular anatomical entity	GO_REF:0000117	IEA	cellular_component	taxon:9823	20230703
A0A8D1MSD5	A0A8D1MSD5	GO:0016020	membrane	GO_REF:0000043	IEA	cellular_component	taxon:9823	20230703
F1RKX9	CRKL	GO:0086100	endothelin receptor signaling pathway	GO_REF:0000107	IEA	biological_process	taxon:9823	20230703
F1RKX9	CRKL	GO:0021987	cerebral cortex development	GO_REF:0000107	IEA	biological_process	taxon:9823	20230703
F1RKX9	CRKL	GO:0001558	regulation of cell growth	GO_REF:0000107	IEA	biological_process	taxon:9823	20230703
F1RKX9	CRKL	GO:0098890	extrinsic component of postsynaptic membrane	GO_REF:0000107	IEA	cellular_component	taxon:9823	20230703
F1RKX9	CRKL	GO:0050773	regulation of dendrite development	GO_REF:0000107	IEA	biological_process	taxon:9823	20230703
F1RKX9	CRKL	GO:0095500	acetylcholine receptor signaling pathway	GO_REF:0000107	IEA	biological_process	taxon:9823	20230703
F1RKX9	CRKL	GO:0001655	urogenital system development	GO_REF:0000107	IEA	biological_process	taxon:9823	20230703
F1RKX9	CRKL	GO:0001568	blood vessel development	GO_REF:0000107	IEA	biological_process	taxon:9823	20230703
F1RKX9	CRKL	GO:0071560	cellular response to transforming growth factor beta stimulus	GO_REF:0000107	IEA	biological_process	taxon:9823	20230703
F1RKX9	CRKL	GO:1903977	positive regulation of glial cell migration	GO_REF:0000107	IEA	biological_process	taxon:9823	20230703
F1RKX9	CRKL	GO:0048538	thymus development	GO_REF:0000107	IEA	biological_process	taxon:9823	20230703
F1RKX9	CRKL	GO:0001784	phosphotyrosine residue binding	GO_REF:0000107	IEA	molecular_function	taxon:9823	20230703
F1RKX9	CRKL	GO:0007338	single fertilization	GO_REF:0000107	IEA	biological_process	taxon:9823	20230703
F1RKX9	CRKL	GO:0010468	regulation of gene expression	GO_REF:0000107	IEA	biological_process	taxon:9823	20230703
F1RKX9	CRKL	GO:0008284	positive regulation of cell population proliferation	GO_REF:0000107	IEA	biological_process	taxon:9823	20230703
F1RKX9	CRKL	GO:0033628	regulation of cell adhesion mediated by integrin	GO_REF:0000107	IEA	biological_process	taxon:9823	20230703
F1RKX9	CRKL	GO:0008584	male gonad development	GO_REF:0000107	IEA	biological_process	taxon:9823	20230703
F1RKX9	CRKL	GO:0008543	fibroblast growth factor receptor signaling pathway	GO_REF:0000107	IEA	biological_process	taxon:9823	20230703
F1RKX9	CRKL	GO:0043410	positive regulation of MAPK cascade	GO_REF:0000107	IEA	biological_process	taxon:9823	20230703
F1RKX9	CRKL	GO:0007389	pattern specification process	GO_REF:0000107	IEA	biological_process	taxon:9823	20230703
F1RKX9	CRKL	GO:0031594	neuromuscular junction	GO_REF:0000107	IEA	cellular_component	taxon:9823	20230703
F1RKX9	CRKL	GO:0009887	animal organ morphogenesis	GO_REF:0000107	IEA	biological_process	taxon:9823	20230703
F1RKX9	CRKL	GO:0098761	cellular response to interleukin-7	GO_REF:0000107	IEA	biological_process	taxon:9823	20230703
F1RKX9	CRKL	GO:0001764	neuron migration	GO_REF:0000107	IEA	biological_process	taxon:9823	20230703
F1RKX9	CRKL	GO:0001933	negative regulation of protein phosphorylation	GO_REF:0000107	IEA	biological_process	taxon:9823	20230703
F1RKX9	CRKL	GO:0006629	lipid metabolic process	GO_REF:0000107	IEA	biological_process	taxon:9823	20230703
F1RKX9	CRKL	GO:0001934	positive regulation of protein phosphorylation	GO_REF:0000107	IEA	biological_process	taxon:9823	20230703
F1RKX9	CRKL	GO:0030010	establishment of cell polarity	GO_REF:0000107	IEA	biological_process	taxon:9823	20230703
F1RKX9	CRKL	GO:0032991	protein-containing complex	GO_REF:0000107	IEA	cellular_component	taxon:9823	20230703
F1RKX9	CRKL	GO:0060017	parathyroid gland development	GO_REF:0000107	IEA	biological_process	taxon:9823	20230703
F1RKX9	CRKL	GO:0071774	response to fibroblast growth factor	GO_REF:0000107	IEA	biological_process	taxon:9823	20230703
F1RKX9	CRKL	GO:0061629	RNA polymerase II-specific DNA-binding transcription factor binding	GO_REF:0000107	IEA	molecular_function	taxon:9823	20230703
F1RKX9	CRKL	GO:0001783	B cell apoptotic process	GO_REF:0000107	IEA	biological_process	taxon:9823	20230703
F1RKX9	CRKL	GO:0009952	anterior/posterior pattern specification	GO_REF:0000107	IEA	biological_process	taxon:9823	20230703
F1RKX9	CRKL	GO:0048384	retinoic acid receptor signaling pathway	GO_REF:0000107	IEA	biological_process	taxon:9823	20230703
F1RKX9	CRKL	GO:0007283	spermatogenesis	GO_REF:0000107	IEA	biological_process	taxon:9823	20230703
F1RKX9	CRKL	GO:0045202	synapse	GO_REF:0000107	IEA	cellular_component	taxon:9823	20230703
F1RKX9	CRKL	GO:0071466	cellular response to xenobiotic stimulus	GO_REF:0000107	IEA	biological_process	taxon:9823	20230703
F1RKX9	CRKL	GO:1904393	regulation of skeletal muscle acetylcholine-gated channel clustering	GO_REF:0000107	IEA	biological_process	taxon:9823	20230703
F1RKX9	CRKL	GO:0060326	cell chemotaxis	GO_REF:0000107	IEA	biological_process	taxon:9823	20230703
F1RKX9	CRKL	GO:0016358	dendrite development	GO_REF:0000107	IEA	biological_process	taxon:9823	20230703
F1RKX9	CRKL	GO:0003151	outflow tract morphogenesis	GO_REF:0000107	IEA	biological_process	taxon:9823	20230703
F1RKX9	CRKL	GO:0035685	helper T cell diapedesis	GO_REF:0000107	IEA	biological_process	taxon:9823	20230703
F1RKX9	CRKL	GO:0005654	nucleoplasm	GO_REF:0000107	IEA	cellular_component	taxon:9823	20230703
F1RKX9	CRKL	GO:1900026	positive regulation of substrate adhesion-dependent cell spreading	GO_REF:0000107	IEA	biological_process	taxon:9823	20230703
F1RKX9	CRKL	GO:0042802	identical protein binding	GO_REF:0000107	IEA	molecular_function	taxon:9823	20230703
F1RKX9	CRKL	GO:0060465	pharynx development	GO_REF:0000107	IEA	biological_process	taxon:9823	20230703
F1RKX9	CRKL	GO:0038026	reelin-mediated signaling pathway	GO_REF:0000107	IEA	biological_process	taxon:9823	20230703
F1RKX9	CRKL	GO:0002685	regulation of leukocyte migration	GO_REF:0000107	IEA	biological_process	taxon:9823	20230703
F1RKX9	CRKL	GO:1904888	cranial skeletal system development	GO_REF:0000107	IEA	biological_process	taxon:9823	20230703
F1RKX9	CRKL	GO:0007507	heart development	GO_REF:0000107	IEA	biological_process	taxon:9823	20230703
F1RKX9	CRKL	GO:0098749	cerebellar neuron development	GO_REF:0000107	IEA	biological_process	taxon:9823	20230703
F1RKX9	CRKL	GO:0098698	postsynaptic specialization assembly	GO_REF:0000107	IEA	biological_process	taxon:9823	20230703
F1RKX9	CRKL	GO:0005829	cytosol	GO_REF:0000107	IEA	cellular_component	taxon:9823	20230703
F1RKX9	CRKL	GO:2000404	regulation of T cell migration	GO_REF:0000107	IEA	biological_process	taxon:9823	20230703
F1RKX9	CRKL	GO:0050852	T cell receptor signaling pathway	GO_REF:0000107	IEA	biological_process	taxon:9823	20230703
F1RKX9	CRKL	GO:0070374	positive regulation of ERK1 and ERK2 cascade	GO_REF:0000107	IEA	biological_process	taxon:9823	20230703
F1RKX9	CRKL	GO:0021766	hippocampus development	GO_REF:0000107	IEA	biological_process	taxon:9823	20230703
F1RKX9	CRKL	GO:0010629	negative regulation of gene expression	GO_REF:0000107	IEA	biological_process	taxon:9823	20230703
A0A8D0YAY8	SLC44A1	GO:0016020	membrane	GO_REF:0000043	IEA	cellular_component	taxon:9823	20230703
A0A8D0YAY8	SLC44A1	GO:0016020	membrane	GO_REF:0000044	IEA	cellular_component	taxon:9823	20230703
A0A8D0YAY8	SLC44A1	GO:0015697	quaternary ammonium group transport	GO_REF:0000108	IEA	biological_process	taxon:9823	20230705
A0A8D0YAY8	SLC44A1	GO:0022857	transmembrane transporter activity	GO_REF:0000104	IEA	molecular_function	taxon:9823	20230703
A0A8D0YAY8	SLC44A1	GO:1901702	salt transmembrane transporter activity	GO_REF:0000117	IEA	molecular_function	taxon:9823	20230703
A0A8D0YAY8	SLC44A1	GO:0015651	quaternary ammonium group transmembrane transporter activity	GO_REF:0000117	IEA	molecular_function	taxon:9823	20230703
A0A8D0YAY8	SLC44A1	GO:0055085	transmembrane transport	GO_REF:0000002	IEA	biological_process	taxon:9823	20230703
A0A8D0YAY8	SLC44A1	GO:0005886	plasma membrane	GO_REF:0000104	IEA	cellular_component	taxon:9823	20230703
A0A8D0YAY8	SLC44A1	GO:0022857	transmembrane transporter activity	GO_REF:0000002	IEA	molecular_function	taxon:9823	20230703
A0A8D0YAY8	SLC44A1	GO:0005886	plasma membrane	GO_REF:0000044	IEA	cellular_component	taxon:9823	20230703
A0A5G2QCU4	EMILIN1	GO:0033627	cell adhesion mediated by integrin	GO_REF:0000107	IEA	biological_process	taxon:9823	20230703
A0A5G2QCU4	EMILIN1	GO:0060090	molecular adaptor activity	GO_REF:0000107	IEA	molecular_function	taxon:9823	20230703
A0A5G2QCU4	EMILIN1	GO:0016525	negative regulation of angiogenesis	GO_REF:0000107	IEA	biological_process	taxon:9823	20230703
A0A5G2QCU4	EMILIN1	GO:0070373	negative regulation of ERK1 and ERK2 cascade	GO_REF:0000107	IEA	biological_process	taxon:9823	20230703
A0A5G2QCU4	EMILIN1	GO:0048251	elastic fiber assembly	GO_REF:0000107	IEA	biological_process	taxon:9823	20230703
A0A5G2QCU4	EMILIN1	GO:0030023	extracellular matrix constituent conferring elasticity	PMID:21873635	IBA	molecular_function	taxon:9823	20170228
A0A5G2QCU4	EMILIN1	GO:0010811	positive regulation of cell-substrate adhesion	GO_REF:0000107	IEA	biological_process	taxon:9823	20230703
A0A5G2QCU4	EMILIN1	GO:0030512	negative regulation of transforming growth factor beta receptor signaling pathway	GO_REF:0000107	IEA	biological_process	taxon:9823	20230703
A0A5G2QCU4	EMILIN1	GO:0050866	negative regulation of cell activation	GO_REF:0000107	IEA	biological_process	taxon:9823	20230703
A0A5G2QCU4	EMILIN1	GO:0002376	immune system process	GO_REF:0000043	IEA	biological_process	taxon:9823	20230703
A0A5G2QCU4	EMILIN1	GO:0034668	integrin alpha4-beta1 complex	GO_REF:0000107	IEA	cellular_component	taxon:9823	20230703
A0A5G2QCU4	EMILIN1	GO:1905522	negative regulation of macrophage migration	GO_REF:0000107	IEA	biological_process	taxon:9823	20230703
A0A5G2QCU4	EMILIN1	GO:0030023	extracellular matrix constituent conferring elasticity	GO_REF:0000107	IEA	molecular_function	taxon:9823	20230703
A0A5G2QCU4	EMILIN1	GO:1904027	negative regulation of collagen fibril organization	GO_REF:0000107	IEA	biological_process	taxon:9823	20230703
A0A5G2QCU4	EMILIN1	GO:0042127	regulation of cell population proliferation	GO_REF:0000107	IEA	biological_process	taxon:9823	20230703
A0A5G2QCU4	EMILIN1	GO:0048583	regulation of response to stimulus	GO_REF:0000117	IEA	biological_process	taxon:9823	20230703
A0A5G2QCU4	EMILIN1	GO:1900747	negative regulation of vascular endothelial growth factor signaling pathway	GO_REF:0000107	IEA	biological_process	taxon:9823	20230703
A0A5G2QCU4	EMILIN1	GO:0045087	innate immune response	GO_REF:0000043	IEA	biological_process	taxon:9823	20230703
A0A5G2QCU4	EMILIN1	GO:0003180	aortic valve morphogenesis	GO_REF:0000107	IEA	biological_process	taxon:9823	20230703
A0A5G2QCU4	EMILIN1	GO:0030198	extracellular matrix organization	GO_REF:0000107	IEA	biological_process	taxon:9823	20230703
A0A5G2QCU4	EMILIN1	GO:0008217	regulation of blood pressure	GO_REF:0000107	IEA	biological_process	taxon:9823	20230703
A0A5G2QCU4	EMILIN1	GO:0098640	integrin binding involved in cell-matrix adhesion	GO_REF:0000107	IEA	molecular_function	taxon:9823	20230703
A0A5G2QCU4	EMILIN1	GO:0032966	negative regulation of collagen biosynthetic process	GO_REF:0000107	IEA	biological_process	taxon:9823	20230703
A0A5G2QCU4	EMILIN1	GO:0062023	collagen-containing extracellular matrix	GO_REF:0000107	IEA	cellular_component	taxon:9823	20230703
A0A5G2QCU4	EMILIN1	GO:0005615	extracellular space	GO_REF:0000107	IEA	cellular_component	taxon:9823	20230703
A0A5G2QCU4	EMILIN1	GO:1900426	positive regulation of defense response to bacterium	GO_REF:0000107	IEA	biological_process	taxon:9823	20230703
A0A5G2QCU4	EMILIN1	GO:0042802	identical protein binding	GO_REF:0000107	IEA	molecular_function	taxon:9823	20230703
A0A5G2QCU4	EMILIN1	GO:0030948	negative regulation of vascular endothelial growth factor receptor signaling pathway	GO_REF:0000107	IEA	biological_process	taxon:9823	20230703
A0A5G2QCU4	EMILIN1	GO:0016477	cell migration	GO_REF:0000107	IEA	biological_process	taxon:9823	20230703
A0A5G2QCU4	EMILIN1	GO:0010629	negative regulation of gene expression	GO_REF:0000107	IEA	biological_process	taxon:9823	20230703
A0A5G2QCU4	EMILIN1	GO:1990971	EMILIN complex	GO_REF:0000107	IEA	cellular_component	taxon:9823	20230703
A0A5G2QCU4	EMILIN1	GO:0010628	positive regulation of gene expression	GO_REF:0000107	IEA	biological_process	taxon:9823	20230703
A0A5G2QCU4	EMILIN1	GO:0031012	extracellular matrix	GO_REF:0000107	IEA	cellular_component	taxon:9823	20230703
A0A5G2QCU4	EMILIN1	GO:0007160	cell-matrix adhesion	GO_REF:0000107	IEA	biological_process	taxon:9823	20230703
A0A5G2QCU4	EMILIN1	GO:1901203	positive regulation of extracellular matrix assembly	GO_REF:0000107	IEA	biological_process	taxon:9823	20230703
A0A5G2QCU4	EMILIN1	GO:0045766	positive regulation of angiogenesis	GO_REF:0000107	IEA	biological_process	taxon:9823	20230703
A0A5G2QCU4	EMILIN1	GO:0005576	extracellular region	GO_REF:0000043	IEA	cellular_component	taxon:9823	20230703
A0A480NCZ0	A0A480NCZ0	GO:0004791	thioredoxin-disulfide reductase activity	GO_REF:0000002	IEA	molecular_function	taxon:9823	20230703
A0A480NCZ0	A0A480NCZ0	GO:0098869	cellular oxidant detoxification	GO_REF:0000108	IEA	biological_process	taxon:9823	20230705
A0A8D0RP19	ETFB	GO:0005759	mitochondrial matrix	GO_REF:0000044	IEA	cellular_component	taxon:9823	20230703
A0A8D0RP19	ETFB	GO:0009055	electron transfer activity	GO_REF:0000002	IEA	molecular_function	taxon:9823	20230703
A0A8D0RP19	ETFB	GO:0005759	mitochondrial matrix	GO_REF:0000104	IEA	cellular_component	taxon:9823	20230703
A0A8D0RP19	ETFB	GO:0005739	mitochondrion	GO_REF:0000043	IEA	cellular_component	taxon:9823	20230703
A0A8D0RP19	ETFB	GO:0022900	electron transport chain	GO_REF:0000108	IEA	biological_process	taxon:9823	20230705
A0A4X1VTQ0	HINT2	GO:0000166	nucleotide binding	GO_REF:0000043	IEA	molecular_function	taxon:9823	20230703
A0A4X1VTQ0	HINT2	GO:0003824	catalytic activity	GO_REF:0000002	IEA	molecular_function	taxon:9823	20230703
A0A8D1PVU8	APEH	GO:0004252	serine-type endopeptidase activity	GO_REF:0000002	IEA	molecular_function	taxon:9823	20230703
A0A8D1PVU8	APEH	GO:0110165	cellular anatomical entity	GO_REF:0000117	IEA	cellular_component	taxon:9823	20230703
A0A8D1PVU8	APEH	GO:0005737	cytoplasm	GO_REF:0000044	IEA	cellular_component	taxon:9823	20230703
A0A8D1PVU8	APEH	GO:0006508	proteolysis	GO_REF:0000002	IEA	biological_process	taxon:9823	20230703
A0A8D1PVU8	APEH	GO:0008236	serine-type peptidase activity	GO_REF:0000002	IEA	molecular_function	taxon:9823	20230703
A0A8D1PVU8	APEH	GO:0005737	cytoplasm	GO_REF:0000043	IEA	cellular_component	taxon:9823	20230703
A0A8D1PVU8	APEH	GO:0008233	peptidase activity	GO_REF:0000117	IEA	molecular_function	taxon:9823	20230703
A0A8D1PVU8	APEH	GO:0016787	hydrolase activity	GO_REF:0000043	IEA	molecular_function	taxon:9823	20230703
A0A8D0XFK1	LOC100522130	GO:0003824	catalytic activity	GO_REF:0000002	IEA	molecular_function	taxon:9823	20230703
A0A287AHM1	ATP5F1C	GO:0006754	ATP biosynthetic process	GO_REF:0000043	IEA	biological_process	taxon:9823	20230703
A0A287AHM1	ATP5F1C	GO:0015986	proton motive force-driven ATP synthesis	GO_REF:0000002	IEA	biological_process	taxon:9823	20230703
A0A287AHM1	ATP5F1C	GO:0015986	proton motive force-driven ATP synthesis	PMID:21873635	IBA	biological_process	taxon:9823	20230405
A0A287AHM1	ATP5F1C	GO:0016020	membrane	GO_REF:0000043	IEA	cellular_component	taxon:9823	20230703
A0A287AHM1	ATP5F1C	GO:0000275	mitochondrial proton-transporting ATP synthase complex, catalytic sector F(1)	PMID:21873635	IBA	cellular_component	taxon:9823	20180509
A0A287AHM1	ATP5F1C	GO:0110165	cellular anatomical entity	GO_REF:0000117	IEA	cellular_component	taxon:9823	20230703
A0A287AHM1	ATP5F1C	GO:0006811	monoatomic ion transport	GO_REF:0000043	IEA	biological_process	taxon:9823	20230703
A0A287AHM1	ATP5F1C	GO:1902600	proton transmembrane transport	GO_REF:0000043	IEA	biological_process	taxon:9823	20230703
A0A287AHM1	ATP5F1C	GO:0045261	proton-transporting ATP synthase complex, catalytic core F(1)	GO_REF:0000043	IEA	cellular_component	taxon:9823	20230703
A0A287AHM1	ATP5F1C	GO:0046933	proton-transporting ATP synthase activity, rotational mechanism	PMID:21873635	IBA	molecular_function	taxon:9823	20221007
A0A287AHM1	ATP5F1C	GO:0045261	proton-transporting ATP synthase complex, catalytic core F(1)	GO_REF:0000002	IEA	cellular_component	taxon:9823	20230703
A0A287AHM1	ATP5F1C	GO:0046933	proton-transporting ATP synthase activity, rotational mechanism	GO_REF:0000002	IEA	molecular_function	taxon:9823	20230703
A0A8D0PUV0	A0A8D0PUV0	GO:0004372	glycine hydroxymethyltransferase activity	GO_REF:0000002	IEA	molecular_function	taxon:9823	20230703
A0A8D0PUV0	A0A8D0PUV0	GO:0006730	one-carbon metabolic process	GO_REF:0000043	IEA	biological_process	taxon:9823	20230703
A0A8D0PUV0	A0A8D0PUV0	GO:0030170	pyridoxal phosphate binding	GO_REF:0000002	IEA	molecular_function	taxon:9823	20230703
A0A8D0PUV0	A0A8D0PUV0	GO:0019264	glycine biosynthetic process from serine	GO_REF:0000002	IEA	biological_process	taxon:9823	20230703
A0A8D0PUV0	A0A8D0PUV0	GO:0035999	tetrahydrofolate interconversion	GO_REF:0000041	IEA	biological_process	taxon:9823	20230703
A0A8D0PUV0	A0A8D0PUV0	GO:0035999	tetrahydrofolate interconversion	GO_REF:0000002	IEA	biological_process	taxon:9823	20230703
A0A8D0PUV0	A0A8D0PUV0	GO:0016740	transferase activity	GO_REF:0000043	IEA	molecular_function	taxon:9823	20230703
B3XXC3	TMSB4X	GO:0007015	actin filament organization	GO_REF:0000104	IEA	biological_process	taxon:9823	20230703
B3XXC3	TMSB4X	GO:0003785	actin monomer binding	GO_REF:0000104	IEA	molecular_function	taxon:9823	20230703
B3XXC3	TMSB4X	GO:2001028	positive regulation of endothelial cell chemotaxis	GO_REF:0000107	IEA	biological_process	taxon:9823	20230703
B3XXC3	TMSB4X	GO:0003785	actin monomer binding	GO_REF:0000002	IEA	molecular_function	taxon:9823	20230703
B3XXC3	TMSB4X	GO:0033209	tumor necrosis factor-mediated signaling pathway	GO_REF:0000107	IEA	biological_process	taxon:9823	20230703
B3XXC3	TMSB4X	GO:0005737	cytoplasm	GO_REF:0000043	IEA	cellular_component	taxon:9823	20230703
B3XXC3	TMSB4X	GO:0005737	cytoplasm	GO_REF:0000107	IEA	cellular_component	taxon:9823	20230703
B3XXC3	TMSB4X	GO:0019899	enzyme binding	GO_REF:0000107	IEA	molecular_function	taxon:9823	20230703
B3XXC3	TMSB4X	GO:1901223	negative regulation of NIK/NF-kappaB signaling	GO_REF:0000107	IEA	biological_process	taxon:9823	20230703
B3XXC3	TMSB4X	GO:0005856	cytoskeleton	GO_REF:0000044	IEA	cellular_component	taxon:9823	20230703
B3XXC3	TMSB4X	GO:0043536	positive regulation of blood vessel endothelial cell migration	GO_REF:0000107	IEA	biological_process	taxon:9823	20230703
B3XXC3	TMSB4X	GO:0032717	negative regulation of interleukin-8 production	GO_REF:0000107	IEA	biological_process	taxon:9823	20230703
B3XXC3	TMSB4X	GO:0003779	actin binding	GO_REF:0000043	IEA	molecular_function	taxon:9823	20230703
B3XXC3	TMSB4X	GO:0030334	regulation of cell migration	GO_REF:0000107	IEA	biological_process	taxon:9823	20230703
B3XXC3	TMSB4X	GO:0007015	actin filament organization	GO_REF:0000002	IEA	biological_process	taxon:9823	20230703
B3XXC3	TMSB4X	GO:0005856	cytoskeleton	GO_REF:0000043	IEA	cellular_component	taxon:9823	20230703
B3XXC3	TMSB4X	GO:0005634	nucleus	GO_REF:0000107	IEA	cellular_component	taxon:9823	20230703
B3XXC3	TMSB4X	GO:0003785	actin monomer binding	GO_REF:0000107	IEA	molecular_function	taxon:9823	20230703
B3XXC3	TMSB4X	GO:0005829	cytosol	GO_REF:0000107	IEA	cellular_component	taxon:9823	20230703
B3XXC3	TMSB4X	GO:0005856	cytoskeleton	GO_REF:0000104	IEA	cellular_component	taxon:9823	20230703
B3XXC3	TMSB4X	GO:0050727	regulation of inflammatory response	GO_REF:0000107	IEA	biological_process	taxon:9823	20230703
B3XXC3	TMSB4X	GO:1901222	regulation of NIK/NF-kappaB signaling	GO_REF:0000107	IEA	biological_process	taxon:9823	20230703
B3XXC3	TMSB4X	GO:2001171	positive regulation of ATP biosynthetic process	GO_REF:0000107	IEA	biological_process	taxon:9823	20230703
B3XXC3	TMSB4X	GO:0042989	sequestering of actin monomers	GO_REF:0000107	IEA	biological_process	taxon:9823	20230703
A0A4X1VYL8	SNX12	GO:0035091	phosphatidylinositol binding	GO_REF:0000002	IEA	molecular_function	taxon:9823	20230703
A0A8D2BHR2	COLGALT2	GO:0016740	transferase activity	GO_REF:0000043	IEA	molecular_function	taxon:9823	20230703
A0A8D2BHR2	COLGALT2	GO:0050211	procollagen galactosyltransferase activity	PMID:21873635	IBA	molecular_function	taxon:9823	20190819
A0A8D2BHR2	COLGALT2	GO:0016757	glycosyltransferase activity	GO_REF:0000043	IEA	molecular_function	taxon:9823	20230703
A0A4X1UHI7	A0A4X1UHI7	GO:0046872	metal ion binding	GO_REF:0000043	IEA	molecular_function	taxon:9823	20230703
A0A4X1UHI7	A0A4X1UHI7	GO:0004497	monooxygenase activity	GO_REF:0000002	IEA	molecular_function	taxon:9823	20230703
A0A4X1UHI7	A0A4X1UHI7	GO:0008116	prostaglandin-I synthase activity	GO_REF:0000003	IEA	molecular_function	taxon:9823	20230703
A0A4X1UHI7	A0A4X1UHI7	GO:0005506	iron ion binding	GO_REF:0000002	IEA	molecular_function	taxon:9823	20230703
A0A4X1UHI7	A0A4X1UHI7	GO:0016705	oxidoreductase activity, acting on paired donors, with incorporation or reduction of molecular oxygen	GO_REF:0000002	IEA	molecular_function	taxon:9823	20230703
A0A4X1UHI7	A0A4X1UHI7	GO:0106256	hydroperoxy icosatetraenoate dehydratase activity	GO_REF:0000003	IEA	molecular_function	taxon:9823	20230703
A0A4X1UHI7	A0A4X1UHI7	GO:0005783	endoplasmic reticulum	GO_REF:0000043	IEA	cellular_component	taxon:9823	20230703
A0A4X1UHI7	A0A4X1UHI7	GO:0020037	heme binding	GO_REF:0000002	IEA	molecular_function	taxon:9823	20230703
A0A8D1JI61	A0A8D1JI61	GO:0003735	structural constituent of ribosome	GO_REF:0000002	IEA	molecular_function	taxon:9823	20230703
A0A8D1JI61	A0A8D1JI61	GO:0005840	ribosome	GO_REF:0000043	IEA	cellular_component	taxon:9823	20230703
A0A8D1JI61	A0A8D1JI61	GO:0044391	ribosomal subunit	GO_REF:0000117	IEA	cellular_component	taxon:9823	20230703
A0A8D1JI61	A0A8D1JI61	GO:0006412	translation	GO_REF:0000002	IEA	biological_process	taxon:9823	20230703
A0A8D1JI61	A0A8D1JI61	GO:1990904	ribonucleoprotein complex	GO_REF:0000043	IEA	cellular_component	taxon:9823	20230703
A0A8D1JI61	A0A8D1JI61	GO:0005840	ribosome	GO_REF:0000002	IEA	cellular_component	taxon:9823	20230703
A0A8D0YZX0	A0A8D0YZX0	GO:0005524	ATP binding	GO_REF:0000043	IEA	molecular_function	taxon:9823	20230703
A0A8D0YZX0	A0A8D0YZX0	GO:0004672	protein kinase activity	GO_REF:0000002	IEA	molecular_function	taxon:9823	20230703
A0A8D0YZX0	A0A8D0YZX0	GO:0005524	ATP binding	GO_REF:0000002	IEA	molecular_function	taxon:9823	20230703
A0A8D0YZX0	A0A8D0YZX0	GO:0000166	nucleotide binding	GO_REF:0000043	IEA	molecular_function	taxon:9823	20230703
A0A8D1H6K9	A0A8D1H6K9	GO:0005739	mitochondrion	GO_REF:0000044	IEA	cellular_component	taxon:9823	20230703
A0A8D1H6K9	A0A8D1H6K9	GO:0005739	mitochondrion	GO_REF:0000043	IEA	cellular_component	taxon:9823	20230703
A0A8D1H6K9	A0A8D1H6K9	GO:0016491	oxidoreductase activity	GO_REF:0000043	IEA	molecular_function	taxon:9823	20230703
A0A8D1H6K9	A0A8D1H6K9	GO:0046872	metal ion binding	GO_REF:0000002	IEA	molecular_function	taxon:9823	20230703
A0A8D1H6K9	A0A8D1H6K9	GO:0004022	alcohol dehydrogenase (NAD+) activity	GO_REF:0000002	IEA	molecular_function	taxon:9823	20230703
A0A8D1H6K9	A0A8D1H6K9	GO:0016491	oxidoreductase activity	GO_REF:0000002	IEA	molecular_function	taxon:9823	20230703
F1SFV7	S100A4	GO:0005634	nucleus	GO_REF:0000107	IEA	cellular_component	taxon:9823	20230703
F1SFV7	S100A4	GO:0005829	cytosol	GO_REF:0000107	IEA	cellular_component	taxon:9823	20230703
F1SFV7	S100A4	GO:0048471	perinuclear region of cytoplasm	GO_REF:0000107	IEA	cellular_component	taxon:9823	20230703
F1SFV7	S100A4	GO:0005509	calcium ion binding	GO_REF:0000107	IEA	molecular_function	taxon:9823	20230703
F1SFV7	S100A4	GO:0005509	calcium ion binding	GO_REF:0000002	IEA	molecular_function	taxon:9823	20230703
F1SFV7	S100A4	GO:0005615	extracellular space	PMID:21873635	IBA	cellular_component	taxon:9823	20200626
F1SFV7	S100A4	GO:0005509	calcium ion binding	PMID:21873635	IBA	molecular_function	taxon:9823	20230405
F1SFV7	S100A4	GO:0046914	transition metal ion binding	GO_REF:0000002	IEA	molecular_function	taxon:9823	20230703
F1SFV7	S100A4	GO:0050786	RAGE receptor binding	GO_REF:0000107	IEA	molecular_function	taxon:9823	20230703
F1SFV7	S100A4	GO:0048471	perinuclear region of cytoplasm	PMID:21873635	IBA	cellular_component	taxon:9823	20200626
F1SFV7	S100A4	GO:0042802	identical protein binding	GO_REF:0000107	IEA	molecular_function	taxon:9823	20230703
F1SFV7	S100A4	GO:0043123	positive regulation of I-kappaB kinase/NF-kappaB signaling	GO_REF:0000107	IEA	biological_process	taxon:9823	20230703
F1SFV7	S100A4	GO:0048306	calcium-dependent protein binding	PMID:21873635	IBA	molecular_function	taxon:9823	20200626
F1SFV7	S100A4	GO:0050918	positive chemotaxis	GO_REF:0000108	IEA	biological_process	taxon:9823	20230705
F1SFV7	S100A4	GO:0042056	chemoattractant activity	GO_REF:0000107	IEA	molecular_function	taxon:9823	20230703
F1SFV7	S100A4	GO:0046872	metal ion binding	GO_REF:0000043	IEA	molecular_function	taxon:9823	20230703
F1SFV7	S100A4	GO:0005615	extracellular space	GO_REF:0000107	IEA	cellular_component	taxon:9823	20230703
F1SFV7	S100A4	GO:0005654	nucleoplasm	GO_REF:0000107	IEA	cellular_component	taxon:9823	20230703
F1SFV7	S100A4	GO:0005634	nucleus	PMID:21873635	IBA	cellular_component	taxon:9823	20230405
F1SFV7	S100A4	GO:0043123	positive regulation of I-kappaB kinase/NF-kappaB signaling	PMID:21873635	IBA	biological_process	taxon:9823	20200626
F1SFV7	S100A4	GO:0050786	RAGE receptor binding	PMID:21873635	IBA	molecular_function	taxon:9823	20200626
A0A8D1FKM6	A0A8D1FKM6	GO:0016020	membrane	GO_REF:0000043	IEA	cellular_component	taxon:9823	20230703
A0A8D1FKM6	A0A8D1FKM6	GO:0005315	inorganic phosphate transmembrane transporter activity	GO_REF:0000002	IEA	molecular_function	taxon:9823	20230703
A0A8D1FKM6	A0A8D1FKM6	GO:0016020	membrane	GO_REF:0000044	IEA	cellular_component	taxon:9823	20230703
A0A8D1FKM6	A0A8D1FKM6	GO:0005743	mitochondrial inner membrane	GO_REF:0000044	IEA	cellular_component	taxon:9823	20230703
A0A8D1FKM6	A0A8D1FKM6	GO:0016020	membrane	GO_REF:0000104	IEA	cellular_component	taxon:9823	20230703
A0A8D1FKM6	A0A8D1FKM6	GO:1990547	mitochondrial phosphate ion transmembrane transport	GO_REF:0000002	IEA	biological_process	taxon:9823	20230703
A0A8D1FKM6	A0A8D1FKM6	GO:0015293	symporter activity	GO_REF:0000043	IEA	molecular_function	taxon:9823	20230703
A0A8D0KCG6	MRI1	GO:0046523	S-methyl-5-thioribose-1-phosphate isomerase activity	GO_REF:0000104	IEA	molecular_function	taxon:9823	20230703
A0A8D0KCG6	MRI1	GO:0005737	cytoplasm	GO_REF:0000104	IEA	cellular_component	taxon:9823	20230703
A0A8D0KCG6	MRI1	GO:0016853	isomerase activity	GO_REF:0000043	IEA	molecular_function	taxon:9823	20230703
A0A8D0KCG6	MRI1	GO:0005737	cytoplasm	GO_REF:0000043	IEA	cellular_component	taxon:9823	20230703
A0A8D0KCG6	MRI1	GO:0009086	methionine biosynthetic process	GO_REF:0000043	IEA	biological_process	taxon:9823	20230703
A0A8D0KCG6	MRI1	GO:0019509	L-methionine salvage from methylthioadenosine	GO_REF:0000041	IEA	biological_process	taxon:9823	20230703
A0A8D0KCG6	MRI1	GO:0008652	amino acid biosynthetic process	GO_REF:0000043	IEA	biological_process	taxon:9823	20230703
A0A8D0KCG6	MRI1	GO:0044249	cellular biosynthetic process	GO_REF:0000002	IEA	biological_process	taxon:9823	20230703
A0A8D0KCG6	MRI1	GO:0005634	nucleus	GO_REF:0000043	IEA	cellular_component	taxon:9823	20230703
A0A8D0KCG6	MRI1	GO:0005634	nucleus	GO_REF:0000104	IEA	cellular_component	taxon:9823	20230703
A0A8D0KCG6	MRI1	GO:0005737	cytoplasm	GO_REF:0000044	IEA	cellular_component	taxon:9823	20230703
A0A8D0KCG6	MRI1	GO:0019284	L-methionine salvage from S-adenosylmethionine	GO_REF:0000104	IEA	biological_process	taxon:9823	20230703
A0A8D0KCG6	MRI1	GO:0005634	nucleus	GO_REF:0000044	IEA	cellular_component	taxon:9823	20230703
Q95L19	Q95L19	GO:1990904	ribonucleoprotein complex	GO_REF:0000043	IEA	cellular_component	taxon:9823	20230703
Q95L19	Q95L19	GO:0006412	translation	GO_REF:0000002	IEA	biological_process	taxon:9823	20230703
Q95L19	Q95L19	GO:0005840	ribosome	GO_REF:0000002	IEA	cellular_component	taxon:9823	20230703
Q95L19	Q95L19	GO:0003735	structural constituent of ribosome	GO_REF:0000002	IEA	molecular_function	taxon:9823	20230703
Q95L19	Q95L19	GO:0022625	cytosolic large ribosomal subunit	GO_REF:0000002	IEA	cellular_component	taxon:9823	20230703
Q95L19	Q95L19	GO:0003723	RNA binding	GO_REF:0000002	IEA	molecular_function	taxon:9823	20230703
Q95L19	Q95L19	GO:0005840	ribosome	GO_REF:0000043	IEA	cellular_component	taxon:9823	20230703
A0A480KM24	A0A480KM24	GO:0008234	cysteine-type peptidase activity	GO_REF:0000043	IEA	molecular_function	taxon:9823	20230703
A0A480KM24	A0A480KM24	GO:0008233	peptidase activity	GO_REF:0000043	IEA	molecular_function	taxon:9823	20230703
A0A480KM24	A0A480KM24	GO:0004843	cysteine-type deubiquitinase activity	GO_REF:0000002	IEA	molecular_function	taxon:9823	20230703
A0A480KM24	A0A480KM24	GO:0006511	ubiquitin-dependent protein catabolic process	GO_REF:0000104	IEA	biological_process	taxon:9823	20230703
A0A480KM24	A0A480KM24	GO:0006511	ubiquitin-dependent protein catabolic process	GO_REF:0000002	IEA	biological_process	taxon:9823	20230703
A0A480KM24	A0A480KM24	GO:0004843	cysteine-type deubiquitinase activity	GO_REF:0000003	IEA	molecular_function	taxon:9823	20230703
A0A480KM24	A0A480KM24	GO:0016787	hydrolase activity	GO_REF:0000043	IEA	molecular_function	taxon:9823	20230703
A0A480KM24	A0A480KM24	GO:0006508	proteolysis	GO_REF:0000043	IEA	biological_process	taxon:9823	20230703
A0A480TW29	A0A480TW29	GO:0003723	RNA binding	GO_REF:0000002	IEA	molecular_function	taxon:9823	20230703
A0A480TW29	A0A480TW29	GO:0003723	RNA binding	GO_REF:0000043	IEA	molecular_function	taxon:9823	20230703
A0A480TW29	A0A480TW29	GO:0003723	RNA binding	GO_REF:0000104	IEA	molecular_function	taxon:9823	20230703
A0A480TW29	A0A480TW29	GO:0003676	nucleic acid binding	GO_REF:0000002	IEA	molecular_function	taxon:9823	20230703
A0A8D1Y9A3	OXSR1	GO:0000166	nucleotide binding	GO_REF:0000043	IEA	molecular_function	taxon:9823	20230703
A0A8D1Y9A3	OXSR1	GO:0004674	protein serine/threonine kinase activity	GO_REF:0000002	IEA	molecular_function	taxon:9823	20230703
A0A8D1Y9A3	OXSR1	GO:0005524	ATP binding	GO_REF:0000104	IEA	molecular_function	taxon:9823	20230703
A0A8D1Y9A3	OXSR1	GO:0000166	nucleotide binding	GO_REF:0000104	IEA	molecular_function	taxon:9823	20230703
A0A8D1Y9A3	OXSR1	GO:0005524	ATP binding	GO_REF:0000043	IEA	molecular_function	taxon:9823	20230703
A0A8D1Y9A3	OXSR1	GO:0005524	ATP binding	GO_REF:0000002	IEA	molecular_function	taxon:9823	20230703
A0A8D1Y9A3	OXSR1	GO:0004672	protein kinase activity	GO_REF:0000002	IEA	molecular_function	taxon:9823	20230703
A0A8D1NEJ7	A0A8D1NEJ7	GO:0006412	translation	GO_REF:0000002	IEA	biological_process	taxon:9823	20230703
A0A8D1NEJ7	A0A8D1NEJ7	GO:0005840	ribosome	GO_REF:0000002	IEA	cellular_component	taxon:9823	20230703
A0A8D1NEJ7	A0A8D1NEJ7	GO:1990904	ribonucleoprotein complex	GO_REF:0000043	IEA	cellular_component	taxon:9823	20230703
A0A8D1NEJ7	A0A8D1NEJ7	GO:0003735	structural constituent of ribosome	GO_REF:0000002	IEA	molecular_function	taxon:9823	20230703
A0A8D1NEJ7	A0A8D1NEJ7	GO:0005840	ribosome	GO_REF:0000043	IEA	cellular_component	taxon:9823	20230703
A0A8D1EMU0	A0A8D1EMU0	GO:0000166	nucleotide binding	GO_REF:0000043	IEA	molecular_function	taxon:9823	20230703
A0A8D1EMU0	A0A8D1EMU0	GO:0003924	GTPase activity	GO_REF:0000002	IEA	molecular_function	taxon:9823	20230703
A0A8D1EMU0	A0A8D1EMU0	GO:0006413	translational initiation	GO_REF:0000043	IEA	biological_process	taxon:9823	20230703
A0A8D1EMU0	A0A8D1EMU0	GO:0003743	translation initiation factor activity	GO_REF:0000043	IEA	molecular_function	taxon:9823	20230703
A0A8D1EMU0	A0A8D1EMU0	GO:0000049	tRNA binding	GO_REF:0000002	IEA	molecular_function	taxon:9823	20230703
A0A8D1EMU0	A0A8D1EMU0	GO:0005525	GTP binding	GO_REF:0000043	IEA	molecular_function	taxon:9823	20230703
A0A8D1EMU0	A0A8D1EMU0	GO:0016787	hydrolase activity	GO_REF:0000043	IEA	molecular_function	taxon:9823	20230703
A0A8D1EMU0	A0A8D1EMU0	GO:0005525	GTP binding	GO_REF:0000002	IEA	molecular_function	taxon:9823	20230703
D0G7F6	TPI1	GO:0006096	glycolytic process	GO_REF:0000002	IEA	biological_process	taxon:9823	20230703
D0G7F6	TPI1	GO:0016829	lyase activity	GO_REF:0000043	IEA	molecular_function	taxon:9823	20230703
D0G7F6	TPI1	GO:0006096	glycolytic process	GO_REF:0000041	IEA	biological_process	taxon:9823	20230703
D0G7F6	TPI1	GO:0006096	glycolytic process	GO_REF:0000043	IEA	biological_process	taxon:9823	20230703
D0G7F6	TPI1	GO:0004807	triose-phosphate isomerase activity	GO_REF:0000002	IEA	molecular_function	taxon:9823	20230703
D0G7F6	TPI1	GO:0016853	isomerase activity	GO_REF:0000043	IEA	molecular_function	taxon:9823	20230703
D0G7F6	TPI1	GO:0006094	gluconeogenesis	GO_REF:0000043	IEA	biological_process	taxon:9823	20230703
D0G7F6	TPI1	GO:0008929	methylglyoxal synthase activity	GO_REF:0000003	IEA	molecular_function	taxon:9823	20230703
D0G7F6	TPI1	GO:0004807	triose-phosphate isomerase activity	GO_REF:0000003	IEA	molecular_function	taxon:9823	20230703
D0G7F6	TPI1	GO:0006094	gluconeogenesis	GO_REF:0000041	IEA	biological_process	taxon:9823	20230703
A0A8D0U7H8	A0A8D0U7H8	GO:0003676	nucleic acid binding	GO_REF:0000002	IEA	molecular_function	taxon:9823	20230703
A0A8D0U7H8	A0A8D0U7H8	GO:0005634	nucleus	GO_REF:0000002	IEA	cellular_component	taxon:9823	20230703
A0A8D0U7H8	A0A8D0U7H8	GO:0003723	RNA binding	GO_REF:0000043	IEA	molecular_function	taxon:9823	20230703
A0A8D0U7H8	A0A8D0U7H8	GO:0003723	RNA binding	GO_REF:0000002	IEA	molecular_function	taxon:9823	20230703
A0A8D0U7H8	A0A8D0U7H8	GO:0003723	RNA binding	GO_REF:0000104	IEA	molecular_function	taxon:9823	20230703
A0A8D0U7H8	A0A8D0U7H8	GO:0006397	mRNA processing	GO_REF:0000002	IEA	biological_process	taxon:9823	20230703
I3LIN2	SYAP1	GO:0048471	perinuclear region of cytoplasm	GO_REF:0000107	IEA	cellular_component	taxon:9823	20230703
I3LIN2	SYAP1	GO:0045211	postsynaptic membrane	GO_REF:0000107	IEA	cellular_component	taxon:9823	20230703
I3LIN2	SYAP1	GO:0030426	growth cone	GO_REF:0000107	IEA	cellular_component	taxon:9823	20230703
I3LIN2	SYAP1	GO:0005654	nucleoplasm	GO_REF:0000107	IEA	cellular_component	taxon:9823	20230703
I3LIN2	SYAP1	GO:0032869	cellular response to insulin stimulus	GO_REF:0000107	IEA	biological_process	taxon:9823	20230703
I3LIN2	SYAP1	GO:0043204	perikaryon	GO_REF:0000107	IEA	cellular_component	taxon:9823	20230703
I3LIN2	SYAP1	GO:0030425	dendrite	GO_REF:0000107	IEA	cellular_component	taxon:9823	20230703
I3LIN2	SYAP1	GO:0030424	axon	GO_REF:0000107	IEA	cellular_component	taxon:9823	20230703
I3LIN2	SYAP1	GO:0005794	Golgi apparatus	GO_REF:0000107	IEA	cellular_component	taxon:9823	20230703
I3LIN2	SYAP1	GO:0071364	cellular response to epidermal growth factor stimulus	GO_REF:0000107	IEA	biological_process	taxon:9823	20230703
I3LIN2	SYAP1	GO:0009898	cytoplasmic side of plasma membrane	GO_REF:0000107	IEA	cellular_component	taxon:9823	20230703
I3LIN2	SYAP1	GO:1990314	cellular response to insulin-like growth factor stimulus	GO_REF:0000107	IEA	biological_process	taxon:9823	20230703
I3LIN2	SYAP1	GO:0005829	cytosol	GO_REF:0000107	IEA	cellular_component	taxon:9823	20230703
I3LIN2	SYAP1	GO:0038203	TORC2 signaling	GO_REF:0000107	IEA	biological_process	taxon:9823	20230703
I3LIN2	SYAP1	GO:0042734	presynaptic membrane	GO_REF:0000107	IEA	cellular_component	taxon:9823	20230703
I3LIN2	SYAP1	GO:0045600	positive regulation of fat cell differentiation	GO_REF:0000107	IEA	biological_process	taxon:9823	20230703
I3LIN2	SYAP1	GO:0036120	cellular response to platelet-derived growth factor stimulus	GO_REF:0000107	IEA	biological_process	taxon:9823	20230703
I3LIN2	SYAP1	GO:0005634	nucleus	GO_REF:0000107	IEA	cellular_component	taxon:9823	20230703
A0A8D0VCR7	PLEC	GO:0110165	cellular anatomical entity	GO_REF:0000117	IEA	cellular_component	taxon:9823	20230703
A0A8D0VCR7	PLEC	GO:0003779	actin binding	GO_REF:0000043	IEA	molecular_function	taxon:9823	20230703
A0A8D0VCR7	PLEC	GO:0045104	intermediate filament cytoskeleton organization	GO_REF:0000002	IEA	biological_process	taxon:9823	20230703
A0A8D0VCR7	PLEC	GO:0005856	cytoskeleton	GO_REF:0000002	IEA	cellular_component	taxon:9823	20230703
A0A8D0P8T5	A0A8D0P8T5	GO:0004298	threonine-type endopeptidase activity	GO_REF:0000002	IEA	molecular_function	taxon:9823	20230703
A0A8D0P8T5	A0A8D0P8T5	GO:0005634	nucleus	GO_REF:0000044	IEA	cellular_component	taxon:9823	20230703
A0A8D0P8T5	A0A8D0P8T5	GO:0005634	nucleus	GO_REF:0000043	IEA	cellular_component	taxon:9823	20230703
A0A8D0P8T5	A0A8D0P8T5	GO:0005839	proteasome core complex	GO_REF:0000002	IEA	cellular_component	taxon:9823	20230703
A0A8D0P8T5	A0A8D0P8T5	GO:0000502	proteasome complex	GO_REF:0000043	IEA	cellular_component	taxon:9823	20230703
A0A8D0P8T5	A0A8D0P8T5	GO:0051603	proteolysis involved in protein catabolic process	GO_REF:0000002	IEA	biological_process	taxon:9823	20230703
A0A8D0NJ66	A0A8D0NJ66	GO:0005840	ribosome	GO_REF:0000002	IEA	cellular_component	taxon:9823	20230703
A0A8D0NJ66	A0A8D0NJ66	GO:0022625	cytosolic large ribosomal subunit	GO_REF:0000117	IEA	cellular_component	taxon:9823	20230703
A0A8D0NJ66	A0A8D0NJ66	GO:0006412	translation	GO_REF:0000002	IEA	biological_process	taxon:9823	20230703
A0A8D0NJ66	A0A8D0NJ66	GO:0003735	structural constituent of ribosome	GO_REF:0000002	IEA	molecular_function	taxon:9823	20230703
I3LDC7	IDH1	GO:0004450	isocitrate dehydrogenase (NADP+) activity	GO_REF:0000003	IEA	molecular_function	taxon:9823	20230703
I3LDC7	IDH1	GO:0016491	oxidoreductase activity	GO_REF:0000043	IEA	molecular_function	taxon:9823	20230703
I3LDC7	IDH1	GO:0004450	isocitrate dehydrogenase (NADP+) activity	PMID:21873635	IBA	molecular_function	taxon:9823	20230405
I3LDC7	IDH1	GO:0000287	magnesium ion binding	GO_REF:0000107	IEA	molecular_function	taxon:9823	20230703
I3LDC7	IDH1	GO:0006099	tricarboxylic acid cycle	GO_REF:0000043	IEA	biological_process	taxon:9823	20230703
I3LDC7	IDH1	GO:0004450	isocitrate dehydrogenase (NADP+) activity	GO_REF:0000117	IEA	molecular_function	taxon:9823	20230703
I3LDC7	IDH1	GO:0004450	isocitrate dehydrogenase (NADP+) activity	GO_REF:0000107	IEA	molecular_function	taxon:9823	20230703
I3LDC7	IDH1	GO:0006979	response to oxidative stress	GO_REF:0000107	IEA	biological_process	taxon:9823	20230703
I3LDC7	IDH1	GO:0006102	isocitrate metabolic process	GO_REF:0000107	IEA	biological_process	taxon:9823	20230703
I3LDC7	IDH1	GO:0005777	peroxisome	PMID:21873635	IBA	cellular_component	taxon:9823	20180510
I3LDC7	IDH1	GO:0005777	peroxisome	GO_REF:0000107	IEA	cellular_component	taxon:9823	20230703
I3LDC7	IDH1	GO:0005739	mitochondrion	GO_REF:0000107	IEA	cellular_component	taxon:9823	20230703
I3LDC7	IDH1	GO:0005737	cytoplasm	GO_REF:0000107	IEA	cellular_component	taxon:9823	20230703
I3LDC7	IDH1	GO:0005829	cytosol	PMID:21873635	IBA	cellular_component	taxon:9823	20210529
I3LDC7	IDH1	GO:0046872	metal ion binding	GO_REF:0000043	IEA	molecular_function	taxon:9823	20230703
I3LDC7	IDH1	GO:0016616	oxidoreductase activity, acting on the CH-OH group of donors, NAD or NADP as acceptor	GO_REF:0000002	IEA	molecular_function	taxon:9823	20230703
I3LDC7	IDH1	GO:0005739	mitochondrion	PMID:21873635	IBA	cellular_component	taxon:9823	20220922
I3LDC7	IDH1	GO:0071071	regulation of phospholipid biosynthetic process	GO_REF:0000107	IEA	biological_process	taxon:9823	20230703
I3LDC7	IDH1	GO:0042802	identical protein binding	GO_REF:0000107	IEA	molecular_function	taxon:9823	20230703
I3LDC7	IDH1	GO:0004450	isocitrate dehydrogenase (NADP+) activity	GO_REF:0000116	IEA	molecular_function	taxon:9823	20230703
I3LDC7	IDH1	GO:0006749	glutathione metabolic process	GO_REF:0000107	IEA	biological_process	taxon:9823	20230703
I3LDC7	IDH1	GO:0000287	magnesium ion binding	GO_REF:0000002	IEA	molecular_function	taxon:9823	20230703
I3LDC7	IDH1	GO:0006097	glyoxylate cycle	GO_REF:0000043	IEA	biological_process	taxon:9823	20230703
I3LDC7	IDH1	GO:0042803	protein homodimerization activity	GO_REF:0000107	IEA	molecular_function	taxon:9823	20230703
I3LDC7	IDH1	GO:0006103	2-oxoglutarate metabolic process	GO_REF:0000107	IEA	biological_process	taxon:9823	20230703
I3LDC7	IDH1	GO:0004450	isocitrate dehydrogenase (NADP+) activity	GO_REF:0000002	IEA	molecular_function	taxon:9823	20230703
I3LDC7	IDH1	GO:0006102	isocitrate metabolic process	GO_REF:0000002	IEA	biological_process	taxon:9823	20230703
I3LDC7	IDH1	GO:0006739	NADP metabolic process	PMID:21873635	IBA	biological_process	taxon:9823	20230405
I3LDC7	IDH1	GO:0051287	NAD binding	GO_REF:0000002	IEA	molecular_function	taxon:9823	20230703
I3LDC7	IDH1	GO:0006102	isocitrate metabolic process	PMID:21873635	IBA	biological_process	taxon:9823	20230405
I3LDC7	IDH1	GO:0060696	regulation of phospholipid catabolic process	GO_REF:0000107	IEA	biological_process	taxon:9823	20230703
I3LDC7	IDH1	GO:0005829	cytosol	GO_REF:0000107	IEA	cellular_component	taxon:9823	20230703
A0A8D0WFH8	A0A8D0WFH8	GO:0003723	RNA binding	GO_REF:0000043	IEA	molecular_function	taxon:9823	20230703
A0A8D0WFH8	A0A8D0WFH8	GO:0003723	RNA binding	GO_REF:0000002	IEA	molecular_function	taxon:9823	20230703
A0A8D0WFH8	A0A8D0WFH8	GO:0003676	nucleic acid binding	GO_REF:0000002	IEA	molecular_function	taxon:9823	20230703
A0A8D0WFH8	A0A8D0WFH8	GO:0003723	RNA binding	GO_REF:0000104	IEA	molecular_function	taxon:9823	20230703
B8Y649	TPRKB	GO:0005634	nucleus	GO_REF:0000043	IEA	cellular_component	taxon:9823	20230703
A0A8D1UVX0	A0A8D1UVX0	GO:0005882	intermediate filament	GO_REF:0000043	IEA	cellular_component	taxon:9823	20230703
A0A8D1UVX0	A0A8D1UVX0	GO:0045095	keratin filament	GO_REF:0000002	IEA	cellular_component	taxon:9823	20230703
P49666	RPL21	GO:0005829	cytosol	GO_REF:0000044	IEA	cellular_component	taxon:9823	20230703
P49666	RPL21	GO:0005783	endoplasmic reticulum	GO_REF:0000044	IEA	cellular_component	taxon:9823	20230703
P49666	RPL21	GO:0031090	organelle membrane	GO_REF:0000117	IEA	cellular_component	taxon:9823	20230703
P49666	RPL21	GO:0003735	structural constituent of ribosome	PMID:21873635	IBA	molecular_function	taxon:9823	20230406
P49666	RPL21	GO:1990904	ribonucleoprotein complex	GO_REF:0000043	IEA	cellular_component	taxon:9823	20230703
P49666	RPL21	GO:0005783	endoplasmic reticulum	GO_REF:0000043	IEA	cellular_component	taxon:9823	20230703
P49666	RPL21	GO:0022625	cytosolic large ribosomal subunit	PMID:21873635	IBA	cellular_component	taxon:9823	20230111
P49666	RPL21	GO:0003735	structural constituent of ribosome	GO_REF:0000002	IEA	molecular_function	taxon:9823	20230703
P49666	RPL21	GO:0005840	ribosome	GO_REF:0000043	IEA	cellular_component	taxon:9823	20230703
P49666	RPL21	GO:0005737	cytoplasm	GO_REF:0000043	IEA	cellular_component	taxon:9823	20230703
P49666	RPL21	GO:0005840	ribosome	GO_REF:0000002	IEA	cellular_component	taxon:9823	20230703
P49666	RPL21	GO:0005737	cytoplasm	GO_REF:0000044	IEA	cellular_component	taxon:9823	20230703
P49666	RPL21	GO:0006412	translation	GO_REF:0000002	IEA	biological_process	taxon:9823	20230703
A0A8D1XHM6	A0A8D1XHM6	GO:0005524	ATP binding	GO_REF:0000104	IEA	molecular_function	taxon:9823	20230703
A0A8D1XHM6	A0A8D1XHM6	GO:0003723	RNA binding	GO_REF:0000104	IEA	molecular_function	taxon:9823	20230703
A0A8D1XHM6	A0A8D1XHM6	GO:0003723	RNA binding	GO_REF:0000043	IEA	molecular_function	taxon:9823	20230703
A0A8D1XHM6	A0A8D1XHM6	GO:0005524	ATP binding	GO_REF:0000043	IEA	molecular_function	taxon:9823	20230703
A0A8D1XHM6	A0A8D1XHM6	GO:0003743	translation initiation factor activity	GO_REF:0000043	IEA	molecular_function	taxon:9823	20230703
A0A8D1XHM6	A0A8D1XHM6	GO:0005524	ATP binding	GO_REF:0000002	IEA	molecular_function	taxon:9823	20230703
A0A8D1XHM6	A0A8D1XHM6	GO:0006412	translation	GO_REF:0000043	IEA	biological_process	taxon:9823	20230703
A0A8D1XHM6	A0A8D1XHM6	GO:0003676	nucleic acid binding	GO_REF:0000002	IEA	molecular_function	taxon:9823	20230703
A0A8D1XHM6	A0A8D1XHM6	GO:0000166	nucleotide binding	GO_REF:0000043	IEA	molecular_function	taxon:9823	20230703
A0A8D1XHM6	A0A8D1XHM6	GO:0003724	RNA helicase activity	GO_REF:0000002	IEA	molecular_function	taxon:9823	20230703
A0A8D1XHM6	A0A8D1XHM6	GO:0016787	hydrolase activity	GO_REF:0000043	IEA	molecular_function	taxon:9823	20230703
A0A8D1XHM6	A0A8D1XHM6	GO:0006413	translational initiation	GO_REF:0000043	IEA	biological_process	taxon:9823	20230703
A0A8D1XHM6	A0A8D1XHM6	GO:0004386	helicase activity	GO_REF:0000043	IEA	molecular_function	taxon:9823	20230703
A0A480VB45	A0A480VB45	GO:0004364	glutathione transferase activity	GO_REF:0000003	IEA	molecular_function	taxon:9823	20230703
A0A480VB45	A0A480VB45	GO:0004364	glutathione transferase activity	GO_REF:0000002	IEA	molecular_function	taxon:9823	20230703
A0A480VB45	A0A480VB45	GO:0042802	identical protein binding	GO_REF:0000117	IEA	molecular_function	taxon:9823	20230703
A0A480VB45	A0A480VB45	GO:0016740	transferase activity	GO_REF:0000043	IEA	molecular_function	taxon:9823	20230703
A0A8D1A2C4	A0A8D1A2C4	GO:0005576	extracellular region	GO_REF:0000002	IEA	cellular_component	taxon:9823	20230703
A0A8D1A2C4	A0A8D1A2C4	GO:0007165	signal transduction	GO_REF:0000108	IEA	biological_process	taxon:9823	20230705
A0A8D1A2C4	A0A8D1A2C4	GO:0008083	growth factor activity	GO_REF:0000043	IEA	molecular_function	taxon:9823	20230703
A0A8D1A2C4	A0A8D1A2C4	GO:0005576	extracellular region	GO_REF:0000043	IEA	cellular_component	taxon:9823	20230703
A0A8D1A2C4	A0A8D1A2C4	GO:0008083	growth factor activity	GO_REF:0000002	IEA	molecular_function	taxon:9823	20230703
A0A8D1GRE5	A0A8D1GRE5	GO:0046872	metal ion binding	GO_REF:0000002	IEA	molecular_function	taxon:9823	20230703
A0A8D1GRE5	A0A8D1GRE5	GO:0016787	hydrolase activity	GO_REF:0000002	IEA	molecular_function	taxon:9823	20230703
A0A8D1GRE5	A0A8D1GRE5	GO:0003676	nucleic acid binding	GO_REF:0000002	IEA	molecular_function	taxon:9823	20230703
F1RFP8	A0A8D1V4Q7	GO:0016874	ligase activity	GO_REF:0000043	IEA	molecular_function	taxon:9823	20230703
F1RFP8	A0A8D1V4Q7	GO:0006629	lipid metabolic process	GO_REF:0000043	IEA	biological_process	taxon:9823	20230703
F1RFP8	A0A8D1V4Q7	GO:0005524	ATP binding	GO_REF:0000043	IEA	molecular_function	taxon:9823	20230703
F1RFP8	A0A8D1V4Q7	GO:0006629	lipid metabolic process	GO_REF:0000002	IEA	biological_process	taxon:9823	20230703
F1RFP8	A0A8D1V4Q7	GO:0006631	fatty acid metabolic process	GO_REF:0000104	IEA	biological_process	taxon:9823	20230703
F1RFP8	A0A8D1V4Q7	GO:0005737	cytoplasm	GO_REF:0000043	IEA	cellular_component	taxon:9823	20230703
F1RFP8	A0A8D1V4Q7	GO:0000166	nucleotide binding	GO_REF:0000043	IEA	molecular_function	taxon:9823	20230703
F1RFP8	A0A8D1V4Q7	GO:0005829	cytosol	GO_REF:0000044	IEA	cellular_component	taxon:9823	20230703
F1RFP8	A0A8D1V4Q7	GO:0030729	acetoacetate-CoA ligase activity	GO_REF:0000002	IEA	molecular_function	taxon:9823	20230703
F1RFP8	A0A8D1V4Q7	GO:0006631	fatty acid metabolic process	GO_REF:0000043	IEA	biological_process	taxon:9823	20230703
F1RFP8	A0A8D1V4Q7	GO:0005524	ATP binding	GO_REF:0000104	IEA	molecular_function	taxon:9823	20230703
F1RFP8	A0A8D1V4Q7	GO:0030729	acetoacetate-CoA ligase activity	GO_REF:0000104	IEA	molecular_function	taxon:9823	20230703
A0A480W141	A0A480W141	GO:0002376	immune system process	GO_REF:0000043	IEA	biological_process	taxon:9823	20230703
A0A480W141	A0A480W141	GO:0005581	collagen trimer	GO_REF:0000043	IEA	cellular_component	taxon:9823	20230703
A0A480W141	A0A480W141	GO:0045087	innate immune response	GO_REF:0000043	IEA	biological_process	taxon:9823	20230703
A0A8D0VQM7	A0A8D0VQM7	GO:0004601	peroxidase activity	GO_REF:0000043	IEA	molecular_function	taxon:9823	20230703
A0A8D0VQM7	A0A8D0VQM7	GO:0098869	cellular oxidant detoxification	GO_REF:0000108	IEA	biological_process	taxon:9823	20230705
A0A8D0VQM7	A0A8D0VQM7	GO:0004602	glutathione peroxidase activity	GO_REF:0000002	IEA	molecular_function	taxon:9823	20230703
A0A8D0VQM7	A0A8D0VQM7	GO:0006979	response to oxidative stress	GO_REF:0000002	IEA	biological_process	taxon:9823	20230703
A0A8D0VQM7	A0A8D0VQM7	GO:0016491	oxidoreductase activity	GO_REF:0000043	IEA	molecular_function	taxon:9823	20230703
A0A4X1T0Y7	MFAP4	GO:0005576	extracellular region	GO_REF:0000043	IEA	cellular_component	taxon:9823	20230703
A0A480QIU2	A0A480QIU2	GO:0005509	calcium ion binding	GO_REF:0000002	IEA	molecular_function	taxon:9823	20230703
A0A480QIU2	A0A480QIU2	GO:0005509	calcium ion binding	GO_REF:0000104	IEA	molecular_function	taxon:9823	20230703
A0A480QIU2	A0A480QIU2	GO:0007155	cell adhesion	GO_REF:0000043	IEA	biological_process	taxon:9823	20230703
A0A480QIU2	A0A480QIU2	GO:0005576	extracellular region	GO_REF:0000002	IEA	cellular_component	taxon:9823	20230703
A0A480QIU2	A0A480QIU2	GO:0007155	cell adhesion	GO_REF:0000002	IEA	biological_process	taxon:9823	20230703
K7GP63	RPL39	GO:0005840	ribosome	GO_REF:0000002	IEA	cellular_component	taxon:9823	20230703
K7GP63	RPL39	GO:0022625	cytosolic large ribosomal subunit	PMID:21873635	IBA	cellular_component	taxon:9823	20230406
K7GP63	RPL39	GO:1990904	ribonucleoprotein complex	GO_REF:0000043	IEA	cellular_component	taxon:9823	20230703
K7GP63	RPL39	GO:0005840	ribosome	GO_REF:0000043	IEA	cellular_component	taxon:9823	20230703
K7GP63	RPL39	GO:0006412	translation	GO_REF:0000002	IEA	biological_process	taxon:9823	20230703
K7GP63	RPL39	GO:0003735	structural constituent of ribosome	GO_REF:0000002	IEA	molecular_function	taxon:9823	20230703
A0A8W4FG18	DDT	GO:0002020	protease binding	GO_REF:0000107	IEA	molecular_function	taxon:9823	20230703
A0A8W4FG18	DDT	GO:0050729	positive regulation of inflammatory response	GO_REF:0000107	IEA	biological_process	taxon:9823	20230703
A0A8W4FG18	DDT	GO:0005615	extracellular space	GO_REF:0000107	IEA	cellular_component	taxon:9823	20230703
A0A8W4FGC6	PFDN4	GO:0016272	prefoldin complex	GO_REF:0000104	IEA	cellular_component	taxon:9823	20230703
A0A8W4FGC6	PFDN4	GO:0051082	unfolded protein binding	GO_REF:0000002	IEA	molecular_function	taxon:9823	20230703
A0A8W4FGC6	PFDN4	GO:0016272	prefoldin complex	GO_REF:0000002	IEA	cellular_component	taxon:9823	20230703
A0A8W4FGC6	PFDN4	GO:0006457	protein folding	GO_REF:0000002	IEA	biological_process	taxon:9823	20230703
A0A8W4FGC6	PFDN4	GO:0006457	protein folding	GO_REF:0000104	IEA	biological_process	taxon:9823	20230703
A0A480XC77	A0A480XC77	GO:0006508	proteolysis	GO_REF:0000002	IEA	biological_process	taxon:9823	20230703
A0A480XC77	A0A480XC77	GO:0070006	metalloaminopeptidase activity	GO_REF:0000002	IEA	molecular_function	taxon:9823	20230703
A0A480XC77	A0A480XC77	GO:0008233	peptidase activity	GO_REF:0000043	IEA	molecular_function	taxon:9823	20230703
A0A480XC77	A0A480XC77	GO:0004177	aminopeptidase activity	GO_REF:0000003	IEA	molecular_function	taxon:9823	20230703
A0A480XC77	A0A480XC77	GO:0006508	proteolysis	GO_REF:0000043	IEA	biological_process	taxon:9823	20230703
A0A480XC77	A0A480XC77	GO:0046872	metal ion binding	GO_REF:0000002	IEA	molecular_function	taxon:9823	20230703
A0A480XC77	A0A480XC77	GO:0016787	hydrolase activity	GO_REF:0000043	IEA	molecular_function	taxon:9823	20230703
A0A480XC77	A0A480XC77	GO:0019538	protein metabolic process	GO_REF:0000002	IEA	biological_process	taxon:9823	20230703
A0A480XC77	A0A480XC77	GO:0005737	cytoplasm	GO_REF:0000002	IEA	cellular_component	taxon:9823	20230703
A0A480XC77	A0A480XC77	GO:0030145	manganese ion binding	GO_REF:0000002	IEA	molecular_function	taxon:9823	20230703
A0A480XC77	A0A480XC77	GO:0004177	aminopeptidase activity	GO_REF:0000043	IEA	molecular_function	taxon:9823	20230703
A0A480K7Q6	A0A480K7Q6	GO:0004364	glutathione transferase activity	GO_REF:0000002	IEA	molecular_function	taxon:9823	20230703
A0A480K7Q6	A0A480K7Q6	GO:0004364	glutathione transferase activity	GO_REF:0000003	IEA	molecular_function	taxon:9823	20230703
A0A480K7Q6	A0A480K7Q6	GO:0042802	identical protein binding	GO_REF:0000117	IEA	molecular_function	taxon:9823	20230703
A0A480K7Q6	A0A480K7Q6	GO:0016740	transferase activity	GO_REF:0000043	IEA	molecular_function	taxon:9823	20230703
A0A5G2RND7	NPEPPS	GO:0008270	zinc ion binding	GO_REF:0000104	IEA	molecular_function	taxon:9823	20230703
A0A5G2RND7	NPEPPS	GO:0046872	metal ion binding	GO_REF:0000043	IEA	molecular_function	taxon:9823	20230703
A0A5G2RND7	NPEPPS	GO:0008270	zinc ion binding	GO_REF:0000002	IEA	molecular_function	taxon:9823	20230703
A0A5G2RND7	NPEPPS	GO:0008237	metallopeptidase activity	GO_REF:0000043	IEA	molecular_function	taxon:9823	20230703
A0A5G2RND7	NPEPPS	GO:0016020	membrane	GO_REF:0000044	IEA	cellular_component	taxon:9823	20230703
A0A5G2RND7	NPEPPS	GO:0016787	hydrolase activity	GO_REF:0000043	IEA	molecular_function	taxon:9823	20230703
A0A5G2RND7	NPEPPS	GO:0008233	peptidase activity	GO_REF:0000043	IEA	molecular_function	taxon:9823	20230703
A0A5G2RND7	NPEPPS	GO:0006508	proteolysis	GO_REF:0000002	IEA	biological_process	taxon:9823	20230703
A0A5G2RND7	NPEPPS	GO:0008237	metallopeptidase activity	GO_REF:0000002	IEA	molecular_function	taxon:9823	20230703
A0A5G2RND7	NPEPPS	GO:0004177	aminopeptidase activity	GO_REF:0000043	IEA	molecular_function	taxon:9823	20230703
A0A5G2RND7	NPEPPS	GO:0006508	proteolysis	GO_REF:0000043	IEA	biological_process	taxon:9823	20230703
A0A8D0N9U9	A0A8D0N9U9	GO:0015031	protein transport	GO_REF:0000043	IEA	biological_process	taxon:9823	20230703
A0A8D0N9U9	A0A8D0N9U9	GO:0035091	phosphatidylinositol binding	GO_REF:0000002	IEA	molecular_function	taxon:9823	20230703
P50828	HPX	GO:0005615	extracellular space	PMID:21873635	IBA	cellular_component	taxon:9823	20230405
P50828	HPX	GO:0015886	heme transport	GO_REF:0000002	IEA	biological_process	taxon:9823	20230703
P50828	HPX	GO:0016798	hydrolase activity, acting on glycosyl bonds	GO_REF:0000043	IEA	molecular_function	taxon:9823	20230703
P50828	HPX	GO:0046872	metal ion binding	GO_REF:0000043	IEA	molecular_function	taxon:9823	20230703
P50828	HPX	GO:0042168	heme metabolic process	PMID:21873635	IBA	biological_process	taxon:9823	20180302
P50828	HPX	GO:0016787	hydrolase activity	GO_REF:0000043	IEA	molecular_function	taxon:9823	20230703
P50828	HPX	GO:0008152	metabolic process	GO_REF:0000043	IEA	biological_process	taxon:9823	20230703
P50828	HPX	GO:0006879	intracellular iron ion homeostasis	GO_REF:0000002	IEA	biological_process	taxon:9823	20230703
P50828	HPX	GO:0004415	hyalurononglucosaminidase activity	GO_REF:0000003	IEA	molecular_function	taxon:9823	20230703
P50828	HPX	GO:0005576	extracellular region	GO_REF:0000044	IEA	cellular_component	taxon:9823	20230703
P50828	HPX	GO:0015232	heme transmembrane transporter activity	GO_REF:0000002	IEA	molecular_function	taxon:9823	20230703
P50828	HPX	GO:0005576	extracellular region	GO_REF:0000043	IEA	cellular_component	taxon:9823	20230703
A0A4X1SLR1	LTA4H	GO:0004463	leukotriene-A4 hydrolase activity	GO_REF:0000003	IEA	molecular_function	taxon:9823	20230703
A0A4X1SLR1	LTA4H	GO:0008233	peptidase activity	GO_REF:0000043	IEA	molecular_function	taxon:9823	20230703
A0A4X1SLR1	LTA4H	GO:0006508	proteolysis	GO_REF:0000043	IEA	biological_process	taxon:9823	20230703
A0A4X1SLR1	LTA4H	GO:0006508	proteolysis	GO_REF:0000002	IEA	biological_process	taxon:9823	20230703
A0A4X1SLR1	LTA4H	GO:0016787	hydrolase activity	GO_REF:0000043	IEA	molecular_function	taxon:9823	20230703
A0A4X1SLR1	LTA4H	GO:0019370	leukotriene biosynthetic process	GO_REF:0000043	IEA	biological_process	taxon:9823	20230703
A0A4X1SLR1	LTA4H	GO:0008237	metallopeptidase activity	GO_REF:0000002	IEA	molecular_function	taxon:9823	20230703
A0A4X1SLR1	LTA4H	GO:0005737	cytoplasm	GO_REF:0000044	IEA	cellular_component	taxon:9823	20230703
A0A4X1SLR1	LTA4H	GO:0008270	zinc ion binding	GO_REF:0000002	IEA	molecular_function	taxon:9823	20230703
A0A4X1SLR1	LTA4H	GO:0008237	metallopeptidase activity	GO_REF:0000043	IEA	molecular_function	taxon:9823	20230703
A0A4X1SLR1	LTA4H	GO:0046872	metal ion binding	GO_REF:0000043	IEA	molecular_function	taxon:9823	20230703
A0A4X1SLR1	LTA4H	GO:0005737	cytoplasm	GO_REF:0000043	IEA	cellular_component	taxon:9823	20230703
A0A287B6H6	D2HGDH	GO:0003824	catalytic activity	GO_REF:0000002	IEA	molecular_function	taxon:9823	20230703
A0A287B6H6	D2HGDH	GO:0050660	flavin adenine dinucleotide binding	GO_REF:0000002	IEA	molecular_function	taxon:9823	20230703
A0A287B6H6	D2HGDH	GO:0071949	FAD binding	GO_REF:0000002	IEA	molecular_function	taxon:9823	20230703
A0A8W4FJV6	RTN3	GO:0016020	membrane	GO_REF:0000104	IEA	cellular_component	taxon:9823	20230703
A0A8W4FJV6	RTN3	GO:0005789	endoplasmic reticulum membrane	GO_REF:0000104	IEA	cellular_component	taxon:9823	20230703
A0A8W4FJV6	RTN3	GO:0016020	membrane	GO_REF:0000044	IEA	cellular_component	taxon:9823	20230703
A0A8W4FJV6	RTN3	GO:0016020	membrane	GO_REF:0000043	IEA	cellular_component	taxon:9823	20230703
A0A8W4FJV6	RTN3	GO:0005789	endoplasmic reticulum membrane	GO_REF:0000044	IEA	cellular_component	taxon:9823	20230703
A0A8W4FJV6	RTN3	GO:0005783	endoplasmic reticulum	GO_REF:0000043	IEA	cellular_component	taxon:9823	20230703
A0A8D0LWT6	RAB14	GO:0005525	GTP binding	GO_REF:0000002	IEA	molecular_function	taxon:9823	20230703
A0A8D0LWT6	RAB14	GO:0003924	GTPase activity	GO_REF:0000002	IEA	molecular_function	taxon:9823	20230703
F1S1D2	CTHRC1	GO:0090103	cochlea morphogenesis	GO_REF:0000107	IEA	biological_process	taxon:9823	20230703
F1S1D2	CTHRC1	GO:0005615	extracellular space	GO_REF:0000107	IEA	cellular_component	taxon:9823	20230703
F1S1D2	CTHRC1	GO:0033690	positive regulation of osteoblast proliferation	GO_REF:0000107	IEA	biological_process	taxon:9823	20230703
F1S1D2	CTHRC1	GO:0005109	frizzled binding	GO_REF:0000107	IEA	molecular_function	taxon:9823	20230703
F1S1D2	CTHRC1	GO:0060122	inner ear receptor cell stereocilium organization	GO_REF:0000107	IEA	biological_process	taxon:9823	20230703
F1S1D2	CTHRC1	GO:0001649	osteoblast differentiation	GO_REF:0000107	IEA	biological_process	taxon:9823	20230703
F1S1D2	CTHRC1	GO:0043932	ossification involved in bone remodeling	GO_REF:0000107	IEA	biological_process	taxon:9823	20230703
F1S1D2	CTHRC1	GO:0017147	Wnt-protein binding	GO_REF:0000107	IEA	molecular_function	taxon:9823	20230703
F1S1D2	CTHRC1	GO:0045669	positive regulation of osteoblast differentiation	GO_REF:0000107	IEA	biological_process	taxon:9823	20230703
F1S1D2	CTHRC1	GO:0016528	sarcoplasm	GO_REF:0000107	IEA	cellular_component	taxon:9823	20230703
F1S1D2	CTHRC1	GO:0033687	osteoblast proliferation	GO_REF:0000107	IEA	biological_process	taxon:9823	20230703
F1S1D2	CTHRC1	GO:0090177	establishment of planar polarity involved in neural tube closure	GO_REF:0000107	IEA	biological_process	taxon:9823	20230703
F1S1D2	CTHRC1	GO:0060071	Wnt signaling pathway, planar cell polarity pathway	GO_REF:0000107	IEA	biological_process	taxon:9823	20230703
F1S1D2	CTHRC1	GO:0090090	negative regulation of canonical Wnt signaling pathway	GO_REF:0000107	IEA	biological_process	taxon:9823	20230703
A0A8D1HQ77	A0A8D0UQC1	GO:0016020	membrane	GO_REF:0000043	IEA	cellular_component	taxon:9823	20230703
A0A8W4FCM0	LASP1	GO:0005737	cytoplasm	GO_REF:0000117	IEA	cellular_component	taxon:9823	20230703
A0A8W4FCM0	LASP1	GO:0005938	cell cortex	GO_REF:0000044	IEA	cellular_component	taxon:9823	20230703
A0A8W4FCM0	LASP1	GO:0006811	monoatomic ion transport	GO_REF:0000043	IEA	biological_process	taxon:9823	20230703
A0A8W4FCM0	LASP1	GO:0005856	cytoskeleton	GO_REF:0000044	IEA	cellular_component	taxon:9823	20230703
A0A8W4FCM0	LASP1	GO:0003779	actin binding	GO_REF:0000043	IEA	molecular_function	taxon:9823	20230703
A0A8D1MCD3	CLU	GO:1902004	positive regulation of amyloid-beta formation	GO_REF:0000107	IEA	biological_process	taxon:9823	20230703
A0A8D1MCD3	CLU	GO:0097440	apical dendrite	GO_REF:0000107	IEA	cellular_component	taxon:9823	20230703
A0A8D1MCD3	CLU	GO:0005576	extracellular region	GO_REF:0000044	IEA	cellular_component	taxon:9823	20230703
A0A8D1MCD3	CLU	GO:0051787	misfolded protein binding	GO_REF:0000107	IEA	molecular_function	taxon:9823	20230703
A0A8D1MCD3	CLU	GO:0031966	mitochondrial membrane	GO_REF:0000044	IEA	cellular_component	taxon:9823	20230703
A0A8D1MCD3	CLU	GO:0031625	ubiquitin protein ligase binding	GO_REF:0000107	IEA	molecular_function	taxon:9823	20230703
A0A8D1MCD3	CLU	GO:2000060	positive regulation of ubiquitin-dependent protein catabolic process	GO_REF:0000107	IEA	biological_process	taxon:9823	20230703
[truncated: 10,381 more rows]
