# Supplementary material for: Porcine nasal septum cartilage-derived decellularized matrix promotes chondrogenic differentiation of human umbilical mesenchymal stem cells without exogenous growth factors
Source: Royal Society of Chemistry journal article supplement (doi:10.1039/d3tb03077f), 2024-01-01
Supplement: d3tb03077f3.xlsx [file d3tb03077f3.xlsx]

## Sheet: KEGG pathway analysis 
#Term	ID	Input number	Background number	Input	P-Value	All	Diff	p-adjust	Hyperlink
ECM-receptor interaction - Sus scrofa (pig)	ssc04512	19	33	A0A480QIU2;A0A8D1VDG8;A0A8X9AEL6;A0A4X1UTP2;A0A4X1V4N3;A0A8D0WGK8;A0A4X1URM7;A0A481BCW8;A0A4X1W063;A0A8D1Z4C9;A0A4X1SK20;A0A8D1PC44;A0A8D0XVN8;A0A8D1KXA4;A0A8D0J102;A0A480WWH8;A0A8D0LHK5;A0A8D1P4K7;A0A8D0T2Q1	1.34193e-14	1552	111	2.4423e-12	http://www.genome.jp/kegg-bin/show_pathway?map=ssc04512&multi_query=ssc:100514785+red,green%0d%0assc:397285+red,green%0d%0assc:397323+red,green%0d%0assc:100513005+red,green%0d%0assc:492313+red,green%0d%0assc:397019+red,green%0d%0assc:100626716+red,green%0d%0assc:100511507+red,green%0d%0assc:100155108+red,green%0d%0assc:100621139+red,green%0d%0assc:100624069+red,green%0d%0assc:397620+red,green%0d%…
Focal adhesion - Sus scrofa (pig)	ssc04510	23	54	A0A8D0KB66;A0A480QIU2;A0A8D0MJU2;A0A8D1VDG8;A0A8X9AEL6;A0A8W4F681;A0A4X1UTP2;P26234;A0A4X1V4N3;E3UV40;F1RKX9;A0A8D0WGK8;A0A4X1URM7;A0A4X1W063;A0A8D1Z4C9;A0A4X1SK20;A0A8D1PC44;I3LVS7;A0A8D1KXA4;A0A8D0J102;A0A8D0LHK5;A0A8D1P4K7;A0A0B8RTY2	8.4014e-14	1552	111	7.64528e-12	http://www.genome.jp/kegg-bin/show_pathway?map=ssc04510&multi_query=ssc:100514785+red,green%0d%0assc:414396+red,green%0d%0assc:397285+red,green%0d%0assc:397323+red,green%0d%0assc:100525363+red,green%0d%0assc:100513005+red,green%0d%0assc:396849+red,green%0d%0assc:492313+red,green%0d%0assc:100518536+red,green%0d%0assc:397019+red,green%0d%0assc:100626716+red,green%0d%0assc:100157220+red,green%0d%0as…
Human papillomavirus infection - Sus scrofa (pig)	ssc05165	16	46	A0A480QIU2;A0A8D1VDG8;A0A8X9AEL6;A0A4X1UTP2;A0A4X1V4N3;E3UV40;A0A8D0WGK8;A0A4X1URM7;A0A4X1W063;A0A8D1Z4C9;A0A8D1PC44;A0A4X1SK20;A0A8D1KXA4;A0A8D0J102;A0A8D0LHK5;A0A8D1P4K7	2.64227e-08	1552	111	1.60298e-06	http://www.genome.jp/kegg-bin/show_pathway?map=ssc05165&multi_query=ssc:100514785+red,green%0d%0assc:397285+red,green%0d%0assc:397323+red,green%0d%0assc:100513005+red,green%0d%0assc:492313+red,green%0d%0assc:397019+red,green%0d%0assc:100626716+red,green%0d%0assc:100511507+red,green%0d%0assc:100155108+red,green%0d%0assc:100624069+red,green%0d%0assc:397620+red,green%0d%0assc:100154581+red,green%0d%…
PI3K-Akt signaling pathway - Sus scrofa (pig)	ssc04151	17	62	A0A480QIU2;A0A8D1VDG8;A0A8X9AEL6;A0A4X1UTP2;A0A4X1V4N3;E3UV40;A0A286ZKC5;A0A8D0WGK8;A0A4X1URM7;A0A4X1W063;A0A8D1Z4C9;A0A8D1PC44;A0A4X1SK20;A0A8D1KXA4;A0A8D0J102;A0A8D0LHK5;A0A8D1P4K7	4.97566e-07	1552	111	2.26392e-05	http://www.genome.jp/kegg-bin/show_pathway?map=ssc04151&multi_query=ssc:100514785+red,green%0d%0assc:397285+red,green%0d%0assc:397323+red,green%0d%0assc:100513005+red,green%0d%0assc:396742+red,green%0d%0assc:492313+red,green%0d%0assc:397019+red,green%0d%0assc:100626716+red,green%0d%0assc:100511507+red,green%0d%0assc:100155108+red,green%0d%0assc:100624069+red,green%0d%0assc:397620+red,green%0d%0as…
Proteoglycans in cancer - Sus scrofa (pig)	ssc05205	14	44	A0A481BCW8;A0A8D1Z4C9;A0A8D1VDG8;A0A8X9AEL6;I3LVS7;A0A8D0XVN8;A0A8D1KXA4;E3UV40;A0A480WWH8;A0A8D0J102;A0A8D0LHK5;A0A4X1URM7;F1SQ09;A0A0B8RTY2	7.63199e-07	1552	111	2.77804e-05	http://www.genome.jp/kegg-bin/show_pathway?map=ssc05205&multi_query=ssc:414396+red,green%0d%0assc:397285+red,green%0d%0assc:396849+red,green%0d%0assc:100152607+red,green%0d%0assc:492313+red,green%0d%0assc:397019+red,green%0d%0assc:100626716+red,green%0d%0assc:397620+red,green%0d%0assc:100153927+red,green%0d%0assc:100517288+red,green%0d%0a
Regulation of actin cytoskeleton - Sus scrofa (pig)	ssc04810	15	51	A0A8D1Z4C9;A0A8D1VDG8;A0A4X1SK20;B3XXC3;I3LVS7;A0A8D1KXA4;P26234;E3UV40;F1RKX9;A0A287AVV3;A0A8D1VAJ7;A0A8D0LHK5;B5APV0;K9IVP5;A0A0B8RTY2	9.33951e-07	1552	111	2.83298e-05	http://www.genome.jp/kegg-bin/show_pathway?map=ssc04810&multi_query=ssc:396904+red,green%0d%0assc:414396+red,green%0d%0assc:397285+red,green%0d%0assc:100525363+red,green%0d%0assc:396849+red,green%0d%0assc:100174965+red,green%0d%0assc:494460+red,green%0d%0assc:397019+red,green%0d%0assc:396974+red,green%0d%0assc:100523290+red,green%0d%0assc:100511507+red,green%0d%0assc:733606+red,green%0d%0assc:397…
Rap1 signaling pathway - Sus scrofa (pig)	ssc04015	10	24	A0A8D0MJU2;I3LVS7;A0A8D1KXA4;E3UV40;F1RKX9;A0A8D0J102;A0A8D0MLR2;Q2PKF4;A0A4X1URM7;A0A0B8RTY2	1.97144e-06	1552	111	5.12575e-05	http://www.genome.jp/kegg-bin/show_pathway?map=ssc04015&multi_query=ssc:414396+red,green%0d%0assc:100525363+red,green%0d%0assc:396849+red,green%0d%0assc:492313+red,green%0d%0assc:397019+red,green%0d%0assc:100157220+red,green%0d%0assc:654405+red,green%0d%0assc:100048953+red,green%0d%0assc:100153927+red,green%0d%0a
Small cell lung cancer - Sus scrofa (pig)	ssc05222	6	9	A0A8D1Z4C9;A0A8D1VDG8;A0A8D1PC44;A0A8D0LHK5;A0A8D1KXA4;A0A4X1V4N3	8.26612e-06	1552	111	0.000185935	http://www.genome.jp/kegg-bin/show_pathway?map=ssc05222&multi_query=ssc:100154581+red,green%0d%0assc:100514785+red,green%0d%0assc:397285+red,green%0d%0assc:397019+red,green%0d%0assc:397620+red,green%0d%0a
Pathways in cancer - Sus scrofa (pig)	ssc05200	14	53	A0A8D1Z4C9;A0A8D1TGN6;A0A8D1VDG8;A0A8D1PC44;I3LVS7;A0A8D1KXA4;A0A4X1V4N3;E3UV40;F1RKX9;A0A286ZKC5;A0A8D1VAJ7;A0A8D0LHK5;A0A8D0MLR2;Q2PKF4	9.19457e-06	1552	111	0.000185935	http://www.genome.jp/kegg-bin/show_pathway?map=ssc05200&multi_query=ssc:100523778+red,green%0d%0assc:100514785+red,green%0d%0assc:397285+red,green%0d%0assc:100525363+red,green%0d%0assc:396742+red,green%0d%0assc:396849+red,green%0d%0assc:494460+red,green%0d%0assc:397019+red,green%0d%0assc:654405+red,green%0d%0assc:100048953+red,green%0d%0assc:397620+red,green%0d%0assc:100154581+red,green%0d%0assc:…
Bacterial invasion of epithelial cells - Sus scrofa (pig)	ssc05100	11	35	A0A8D1TGN6;A0A8D1VDG8;I3LVS7;A0A8W4F681;A0A8D1KXA4;P26234;F1RKX9;A0A8D0LHK5;B5APV0;A0A8D0MLR2;A0A0B8RTY2	1.48628e-05	1552	111	0.000270503	http://www.genome.jp/kegg-bin/show_pathway?map=ssc05100&multi_query=ssc:396974+red,green%0d%0assc:100523778+red,green%0d%0assc:414396+red,green%0d%0assc:100623256+red,green%0d%0assc:100048953+red,green%0d%0assc:100525363+red,green%0d%0assc:397620+red,green%0d%0assc:396849+red,green%0d%0assc:100174965+red,green%0d%0assc:397019+red,green%0d%0a
Endometrial cancer - Sus scrofa (pig)	ssc05213	4	5	A0A8D1TGN6;A0A8D0MLR2;A0A8W4F681;E3UV40	0.000117475	1552	111	0.00194367	http://www.genome.jp/kegg-bin/show_pathway?map=ssc05213&multi_query=ssc:100523778+red,green%0d%0assc:100623256+red,green%0d%0assc:100048953+red,green%0d%0assc:100153927+red,green%0d%0a
TGF-beta signaling pathway - Sus scrofa (pig)	ssc04350	7	19	A0A8D0J102;I3LVS7;A0A8D1G600;A0A8D1AUT0;A0A4X1URM7;A0A8D1A2C4;E3UV40	0.000194933	1552	111	0.00295648	http://www.genome.jp/kegg-bin/show_pathway?map=ssc04350&multi_query=ssc:396849+red,green%0d%0assc:492313+red,green%0d%0assc:100520988+red,green%0d%0assc:100156280+red,green%0d%0assc:492315+red,green%0d%0assc:100153927+red,green%0d%0a
Adherens junction - Sus scrofa (pig)	ssc04520	7	21	A0A8D1TGN6;A0A8D0MLR2;I3LVS7;A0A4X1VEM2;P26234;A0A0B8RTY2;E3UV40	0.000398727	1552	111	0.00558218	http://www.genome.jp/kegg-bin/show_pathway?map=ssc04520&multi_query=ssc:100523778+red,green%0d%0assc:414396+red,green%0d%0assc:100157978+red,green%0d%0assc:396849+red,green%0d%0assc:396974+red,green%0d%0assc:100048953+red,green%0d%0assc:100153927+red,green%0d%0a
Platelet activation - Sus scrofa (pig)	ssc04611	7	22	A0A8D0MJU2;A0A8X9AEL6;I3LVS7;Q2PKF4;A0A8D1KXA4;A0A0B8RTY2;E3UV40	0.000550603	1552	111	0.00715783	http://www.genome.jp/kegg-bin/show_pathway?map=ssc04611&multi_query=ssc:654405+red,green%0d%0assc:396849+red,green%0d%0assc:100153927+red,green%0d%0assc:414396+red,green%0d%0assc:397019+red,green%0d%0assc:100626716+red,green%0d%0assc:100157220+red,green%0d%0a
Yersinia infection - Sus scrofa (pig)	ssc05135	9	36	A0A8D1VDG8;I3LVS7;A0A8D1KXA4;E3UV40;F1RKX9;B5APV0;A0A8D0LHK5;Q2PKF4;A0A0B8RTY2	0.000647282	1552	111	0.00785368	http://www.genome.jp/kegg-bin/show_pathway?map=ssc05135&multi_query=ssc:654405+red,green%0d%0assc:414396+red,green%0d%0assc:100525363+red,green%0d%0assc:397620+red,green%0d%0assc:396849+red,green%0d%0assc:100174965+red,green%0d%0assc:100153927+red,green%0d%0assc:397019+red,green%0d%0a
Bladder cancer - Sus scrofa (pig)	ssc05219	4	7	A0A8D0J102;A0A8D0MLR2;A0A4X1URM7;E3UV40	0.000734141	1552	111	0.00835085	http://www.genome.jp/kegg-bin/show_pathway?map=ssc05219&multi_query=ssc:100048953+red,green%0d%0assc:100153927+red,green%0d%0assc:492313+red,green%0d%0a
Malaria - Sus scrofa (pig)	ssc05144	5	12	A0A4X1W063;A0A480QIU2;A0A8D0J102;A0A8D1P4K7;A0A4X1URM7	0.000903554	1552	111	0.00967334	http://www.genome.jp/kegg-bin/show_pathway?map=ssc05144&multi_query=ssc:100155108+red,green%0d%0assc:100153940+red,green%0d%0assc:492313+red,green%0d%0assc:100513005+red,green%0d%0a
Arrhythmogenic right ventricular cardiomyopathy - Sus scrofa (pig)	ssc05412	5	13	A0A8D1Z4C9;A0A8D1TGN6;A0A4X1SK20;A0A8D1KXA4;A0A0B8RTY2	0.00138518	1552	111	0.0140057	http://www.genome.jp/kegg-bin/show_pathway?map=ssc05412&multi_query=ssc:100523778+red,green%0d%0assc:414396+red,green%0d%0assc:397285+red,green%0d%0assc:397019+red,green%0d%0assc:100511507+red,green%0d%0a
Amoebiasis - Sus scrofa (pig)	ssc05146	8	33	A0A8D1VDG8;A0A8D1PC44;A0A8X9AEL6;Q06AU6;P26234;A0A4X1V4N3;A0A8D0LHK5;Q2PKF4	0.0016308	1552	111	0.0156214	http://www.genome.jp/kegg-bin/show_pathway?map=ssc05146&multi_query=ssc:100514785+red,green%0d%0assc:100626716+red,green%0d%0assc:654405+red,green%0d%0assc:396974+red,green%0d%0assc:397620+red,green%0d%0assc:100154581+red,green%0d%0assc:100144499+red,green%0d%0a
Hippo signaling pathway - Sus scrofa (pig)	ssc04390	6	20	A0A8D1TGN6;A0A8D0MLR2;F1S3P6;A0A8D1AUT0;A0A8D1A2C4;A0A0B8RTY2	0.00198051	1552	111	0.0180226	http://www.genome.jp/kegg-bin/show_pathway?map=ssc04390&multi_query=ssc:100520988+red,green%0d%0assc:100523778+red,green%0d%0assc:414396+red,green%0d%0assc:100048953+red,green%0d%0assc:492315+red,green%0d%0assc:100152141+red,green%0d%0a
Gastric cancer - Sus scrofa (pig)	ssc05226	3	5	A0A8D1TGN6;A0A8D0MLR2;E3UV40	0.00320429	1552	111	0.0277705	http://www.genome.jp/kegg-bin/show_pathway?map=ssc05226&multi_query=ssc:100523778+red,green%0d%0assc:100048953+red,green%0d%0assc:100153927+red,green%0d%0a
Axon guidance - Sus scrofa (pig)	ssc04360	6	22	A0A8D1VAJ7;I3LVS7;A0A8W4F681;A0A8D1A2C4;A0A8D1KXA4;E3UV40	0.0033867	1552	111	0.0280172	http://www.genome.jp/kegg-bin/show_pathway?map=ssc04360&multi_query=ssc:396849+red,green%0d%0assc:494460+red,green%0d%0assc:397019+red,green%0d%0assc:100623256+red,green%0d%0assc:492315+red,green%0d%0assc:100153927+red,green%0d%0a
Cytokine-cytokine receptor interaction - Sus scrofa (pig)	ssc04060	4	10	A0A8D0MVS1;A0A8D1VAJ7;A0A8D1AUT0;A0A8D1A2C4	0.00371891	1552	111	0.0294279	http://www.genome.jp/kegg-bin/show_pathway?map=ssc04060&multi_query=ssc:494464+red,green%0d%0assc:494460+red,green%0d%0assc:100520988+red,green%0d%0assc:492315+red,green%0d%0a
p53 signaling pathway - Sus scrofa (pig)	ssc04115	2	2	A0A8D0J102;A0A4X1URM7	0.00507238	1552	111	0.0384656	http://www.genome.jp/kegg-bin/show_pathway?map=ssc04115&multi_query=ssc:492313+red,green%0d%0a
Chemokine signaling pathway - Sus scrofa (pig)	ssc04062	6	24	A0A8D0MVS1;A0A8D1VAJ7;I3LVS7;Q2PKF4;E3UV40;F1RKX9	0.00542842	1552	111	0.0395189	http://www.genome.jp/kegg-bin/show_pathway?map=ssc04062&multi_query=ssc:494464+red,green%0d%0assc:100525363+red,green%0d%0assc:396849+red,green%0d%0assc:494460+red,green%0d%0assc:654405+red,green%0d%0assc:100153927+red,green%0d%0a
AGE-RAGE signaling pathway in diabetic complications - Sus scrofa (pig)	ssc04933	4	12	A0A8D1VDG8;A0A8D0LHK5;A0A8X9AEL6;E3UV40	0.00783531	1552	111	0.0548472	http://www.genome.jp/kegg-bin/show_pathway?map=ssc04933&multi_query=ssc:100626716+red,green%0d%0assc:397620+red,green%0d%0assc:100153927+red,green%0d%0a
Leukocyte transendothelial migration - Sus scrofa (pig)	ssc04670	6	26	A0A8D1TGN6;A0A8D1VAJ7;I3LVS7;A0A8D1KXA4;P26234;A0A0B8RTY2	0.00825271	1552	111	0.0556294	http://www.genome.jp/kegg-bin/show_pathway?map=ssc04670&multi_query=ssc:396974+red,green%0d%0assc:100523778+red,green%0d%0assc:414396+red,green%0d%0assc:396849+red,green%0d%0assc:494460+red,green%0d%0assc:397019+red,green%0d%0a
Cell adhesion molecules - Sus scrofa (pig)	ssc04514	4	13	A0A8D1Z4C9;I3LPL7;A0A8D0MLR2;A0A8D1KXA4	0.010702	1552	111	0.0695633	http://www.genome.jp/kegg-bin/show_pathway?map=ssc04514&multi_query=ssc:397285+red,green%0d%0assc:397019+red,green%0d%0assc:100048953+red,green%0d%0assc:100622584+red,green%0d%0a
Human cytomegalovirus infection - Sus scrofa (pig)	ssc05163	6	28	A0A8D1Z4C9;A0A8D1VAJ7;I3LVS7;Q2PKF4;E3UV40;F1RKX9	0.0120058	1552	111	0.0741581	http://www.genome.jp/kegg-bin/show_pathway?map=ssc05163&multi_query=ssc:397285+red,green%0d%0assc:100525363+red,green%0d%0assc:396849+red,green%0d%0assc:494460+red,green%0d%0assc:654405+red,green%0d%0assc:100153927+red,green%0d%0a
Phagosome - Sus scrofa (pig)	ssc04145	9	54	A0A4X1W063;A0A480QIU2;A0A8D1Z4C9;Q06AU6;A0A8D1KXA4;A0A8D0J102;A0A8D1P4K7;A0A4X1URM7;A0A0B8RTY2	0.0122239	1552	111	0.0741581	http://www.genome.jp/kegg-bin/show_pathway?map=ssc04145&multi_query=ssc:414396+red,green%0d%0assc:397285+red,green%0d%0assc:100513005+red,green%0d%0assc:492313+red,green%0d%0assc:397019+red,green%0d%0assc:100155108+red,green%0d%0assc:100153940+red,green%0d%0assc:100144499+red,green%0d%0a
Melanoma - Sus scrofa (pig)	ssc05218	2	3	A0A8D0MLR2;E3UV40	0.0145037	1552	111	0.0851511	http://www.genome.jp/kegg-bin/show_pathway?map=ssc05218&multi_query=ssc:100048953+red,green%0d%0assc:100153927+red,green%0d%0a
MicroRNAs in cancer - Sus scrofa (pig)	ssc05206	5	22	A0A8D0J102;I3LVS7;A0A4X1URM7;E3UV40;F1RKX9	0.0168432	1552	111	0.0950352	http://www.genome.jp/kegg-bin/show_pathway?map=ssc05206&multi_query=ssc:100525363+red,green%0d%0assc:396849+red,green%0d%0assc:492313+red,green%0d%0assc:100153927+red,green%0d%0a
Wnt signaling pathway - Sus scrofa (pig)	ssc04310	4	15	S5Y9V4;I3LVS7;A0A8D0M8F0;F1S2X1	0.018276	1552	111	0.0950352	http://www.genome.jp/kegg-bin/show_pathway?map=ssc04310&multi_query=ssc:396849+red,green%0d%0assc:100155208+red,green%0d%0assc:100152419+red,green%0d%0assc:100621622+red,green%0d%0a
Hepatitis B - Sus scrofa (pig)	ssc05161	4	15	A0A481BCW8;A0A480WWH8;A0A8D0XVN8;E3UV40	0.018276	1552	111	0.0950352	http://www.genome.jp/kegg-bin/show_pathway?map=ssc05161&multi_query=ssc:100153927+red,green%0d%0assc:100517288+red,green%0d%0a
Apelin signaling pathway - Sus scrofa (pig)	ssc04371	4	15	A0A8D0MLR2;F1S3P6;Q2PKF4;E3UV40	0.018276	1552	111	0.0950352	http://www.genome.jp/kegg-bin/show_pathway?map=ssc04371&multi_query=ssc:654405+red,green%0d%0assc:100153927+red,green%0d%0assc:100048953+red,green%0d%0assc:100152141+red,green%0d%0a
Growth hormone synthesis, secretion and action - Sus scrofa (pig)	ssc04935	3	9	Q2PKF4;E3UV40;F1RKX9	0.021767	1552	111	0.110044	http://www.genome.jp/kegg-bin/show_pathway?map=ssc04935&multi_query=ssc:100525363+red,green%0d%0assc:654405+red,green%0d%0assc:100153927+red,green%0d%0a
Toxoplasmosis - Sus scrofa (pig)	ssc05145	4	16	A0A8D1PC44;A0A8D1KXA4;A0A4X1V4N3;E3UV40	0.0230516	1552	111	0.113389	http://www.genome.jp/kegg-bin/show_pathway?map=ssc05145&multi_query=ssc:100514785+red,green%0d%0assc:397019+red,green%0d%0assc:100154581+red,green%0d%0assc:100153927+red,green%0d%0a
GnRH secretion - Sus scrofa (pig)	ssc04929	2	4	Q2PKF4;E3UV40	0.0276553	1552	111	0.132454	http://www.genome.jp/kegg-bin/show_pathway?map=ssc04929&multi_query=ssc:654405+red,green%0d%0assc:100153927+red,green%0d%0a
Vascular smooth muscle contraction - Sus scrofa (pig)	ssc04270	4	17	I3LVS7;K9IVP5;Q2PKF4;E3UV40	0.0285197	1552	111	0.133092	http://www.genome.jp/kegg-bin/show_pathway?map=ssc04270&multi_query=ssc:396904+red,green%0d%0assc:396849+red,green%0d%0assc:654405+red,green%0d%0assc:100153927+red,green%0d%0a
Parathyroid hormone synthesis, secretion and action - Sus scrofa (pig)	ssc04928	3	11	I3LVS7;Q2PKF4;E3UV40	0.0384934	1552	111	0.175145	http://www.genome.jp/kegg-bin/show_pathway?map=ssc04928&multi_query=ssc:396849+red,green%0d%0assc:654405+red,green%0d%0assc:100153927+red,green%0d%0a
Hypertrophic cardiomyopathy - Sus scrofa (pig)	ssc05410	4	19	A0A8D1Z4C9;A0A4X1SK20;A0A8D1KXA4;A0A0B8RTY2	0.0415923	1552	111	0.181818	http://www.genome.jp/kegg-bin/show_pathway?map=ssc05410&multi_query=ssc:414396+red,green%0d%0assc:397285+red,green%0d%0assc:397019+red,green%0d%0assc:100511507+red,green%0d%0a
Thyroid cancer - Sus scrofa (pig)	ssc05216	2	5	A0A8D0MLR2;E3UV40	0.043956	1552	111	0.181818	http://www.genome.jp/kegg-bin/show_pathway?map=ssc05216&multi_query=ssc:100048953+red,green%0d%0assc:100153927+red,green%0d%0a
Th17 cell differentiation - Sus scrofa (pig)	ssc04659	2	5	A0A286ZKC5;E3UV40	0.043956	1552	111	0.181818	http://www.genome.jp/kegg-bin/show_pathway?map=ssc04659&multi_query=ssc:396742+red,green%0d%0assc:100153927+red,green%0d%0a
T cell receptor signaling pathway - Sus scrofa (pig)	ssc04660	2	5	I3LVS7;E3UV40	0.043956	1552	111	0.181818	http://www.genome.jp/kegg-bin/show_pathway?map=ssc04660&multi_query=ssc:396849+red,green%0d%0assc:100153927+red,green%0d%0a
Oxytocin signaling pathway - Sus scrofa (pig)	ssc04921	4	21	I3LVS7;Q2PKF4;A0A0B8RTY2;E3UV40	0.0575442	1552	111	0.220137	http://www.genome.jp/kegg-bin/show_pathway?map=ssc04921&multi_query=ssc:414396+red,green%0d%0assc:396849+red,green%0d%0assc:654405+red,green%0d%0assc:100153927+red,green%0d%0a
Pertussis - Sus scrofa (pig)	ssc05133	3	13	I3LVS7;A0A8D1KXA4;E3UV40	0.0601159	1552	111	0.220137	http://www.genome.jp/kegg-bin/show_pathway?map=ssc05133&multi_query=ssc:396849+red,green%0d%0assc:100153927+red,green%0d%0assc:397019+red,green%0d%0a
Sphingolipid signaling pathway - Sus scrofa (pig)	ssc04071	3	13	I3LVS7;Q2PKF4;E3UV40	0.0601159	1552	111	0.220137	http://www.genome.jp/kegg-bin/show_pathway?map=ssc04071&multi_query=ssc:654405+red,green%0d%0assc:396849+red,green%0d%0assc:100153927+red,green%0d%0a
Prostate cancer - Sus scrofa (pig)	ssc05215	2	6	A0A286ZKC5;E3UV40	0.0628961	1552	111	0.220137	http://www.genome.jp/kegg-bin/show_pathway?map=ssc05215&multi_query=ssc:396742+red,green%0d%0assc:100153927+red,green%0d%0a
Glycosaminoglycan biosynthesis - chondroitin sulfate / dermatan sulfate - Sus scrofa (pig)	ssc00532	2	6	A0A8D1G707;F1SG44	0.0628961	1552	111	0.220137	http://www.genome.jp/kegg-bin/show_pathway?map=ssc00532&multi_query=ssc:100157186+red,green%0d%0assc:100514160+red,green%0d%0a
Colorectal cancer - Sus scrofa (pig)	ssc05210	2	6	I3LVS7;E3UV40	0.0628961	1552	111	0.220137	http://www.genome.jp/kegg-bin/show_pathway?map=ssc05210&multi_query=ssc:396849+red,green%0d%0assc:100153927+red,green%0d%0a
Viral protein interaction with cytokine and cytokine receptor - Sus scrofa (pig)	ssc04061	2	6	A0A8D0MVS1;A0A8D1VAJ7	0.0628961	1552	111	0.220137	http://www.genome.jp/kegg-bin/show_pathway?map=ssc04061&multi_query=ssc:494460+red,green%0d%0assc:494464+red,green%0d%0a
Chronic myeloid leukemia - Sus scrofa (pig)	ssc05220	2	6	E3UV40;F1RKX9	0.0628961	1552	111	0.220137	http://www.genome.jp/kegg-bin/show_pathway?map=ssc05220&multi_query=ssc:100525363+red,green%0d%0assc:100153927+red,green%0d%0a
Fluid shear stress and atherosclerosis - Sus scrofa (pig)	ssc05418	4	22	A0A286ZKC5;A0A8D1Z4C9;I3LVS7;A0A0B8RTY2	0.0665889	1552	111	0.228664	http://www.genome.jp/kegg-bin/show_pathway?map=ssc05418&multi_query=ssc:414396+red,green%0d%0assc:397285+red,green%0d%0assc:396849+red,green%0d%0assc:396742+red,green%0d%0a
Neurotrophin signaling pathway - Sus scrofa (pig)	ssc04722	3	14	I3LVS7;E3UV40;F1RKX9	0.0726467	1552	111	0.244846	http://www.genome.jp/kegg-bin/show_pathway?map=ssc04722&multi_query=ssc:100525363+red,green%0d%0assc:396849+red,green%0d%0assc:100153927+red,green%0d%0a
Progesterone-mediated oocyte maturation - Sus scrofa (pig)	ssc04914	2	7	A0A286ZKC5;E3UV40	0.0840219	1552	111	0.273071	http://www.genome.jp/kegg-bin/show_pathway?map=ssc04914&multi_query=ssc:396742+red,green%0d%0assc:100153927+red,green%0d%0a
ErbB signaling pathway - Sus scrofa (pig)	ssc04012	2	7	E3UV40;F1RKX9	0.0840219	1552	111	0.273071	http://www.genome.jp/kegg-bin/show_pathway?map=ssc04012&multi_query=ssc:100525363+red,green%0d%0assc:100153927+red,green%0d%0a
NOD-like receptor signaling pathway - Sus scrofa (pig)	ssc04621	3	15	A0A286ZKC5;I3LVS7;E3UV40	0.0862394	1552	111	0.275361	http://www.genome.jp/kegg-bin/show_pathway?map=ssc04621&multi_query=ssc:396849+red,green%0d%0assc:396742+red,green%0d%0assc:100153927+red,green%0d%0a
Salmonella infection - Sus scrofa (pig)	ssc05132	7	56	A0A286ZKC5;A0A287AVV3;Q06AU6;B5APV0;I3LVS7;A0A0B8RTY2;E3UV40	0.0994919	1552	111	0.312199	http://www.genome.jp/kegg-bin/show_pathway?map=ssc05132&multi_query=ssc:414396+red,green%0d%0assc:396849+red,green%0d%0assc:396742+red,green%0d%0assc:100174965+red,green%0d%0assc:100523290+red,green%0d%0assc:100153927+red,green%0d%0assc:100144499+red,green%0d%0a
C-type lectin receptor signaling pathway - Sus scrofa (pig)	ssc04625	2	8	I3LVS7;E3UV40	0.10693	1552	111	0.324354	http://www.genome.jp/kegg-bin/show_pathway?map=ssc04625&multi_query=ssc:396849+red,green%0d%0assc:100153927+red,green%0d%0a
Long-term depression - Sus scrofa (pig)	ssc04730	2	8	Q2PKF4;E3UV40	0.10693	1552	111	0.324354	http://www.genome.jp/kegg-bin/show_pathway?map=ssc04730&multi_query=ssc:654405+red,green%0d%0assc:100153927+red,green%0d%0a
IL-17 signaling pathway - Sus scrofa (pig)	ssc04657	2	9	A0A286ZKC5;E3UV40	0.131262	1552	111	0.377189	http://www.genome.jp/kegg-bin/show_pathway?map=ssc04657&multi_query=ssc:396742+red,green%0d%0assc:100153927+red,green%0d%0a
Melanogenesis - Sus scrofa (pig)	ssc04916	2	9	Q2PKF4;E3UV40	0.131262	1552	111	0.377189	http://www.genome.jp/kegg-bin/show_pathway?map=ssc04916&multi_query=ssc:654405+red,green%0d%0assc:100153927+red,green%0d%0a
Ras signaling pathway - Sus scrofa (pig)	ssc04014	3	18	Q06AU6;I3LVS7;E3UV40	0.132638	1552	111	0.377189	http://www.genome.jp/kegg-bin/show_pathway?map=ssc04014&multi_query=ssc:396849+red,green%0d%0assc:100153927+red,green%0d%0assc:100144499+red,green%0d%0a
Estrogen signaling pathway - Sus scrofa (pig)	ssc04915	3	18	A0A286ZKC5;Q2PKF4;E3UV40	0.132638	1552	111	0.377189	http://www.genome.jp/kegg-bin/show_pathway?map=ssc04915&multi_query=ssc:396742+red,green%0d%0assc:654405+red,green%0d%0assc:100153927+red,green%0d%0a
Breast cancer - Sus scrofa (pig)	ssc05224	1	2	E3UV40	0.137969	1552	111	0.38046	http://www.genome.jp/kegg-bin/show_pathway?map=ssc05224&multi_query=ssc:100153927+red,green%0d%0a
Acute myeloid leukemia - Sus scrofa (pig)	ssc05221	1	2	E3UV40	0.137969	1552	111	0.38046	http://www.genome.jp/kegg-bin/show_pathway?map=ssc05221&multi_query=ssc:100153927+red,green%0d%0a
Long-term potentiation - Sus scrofa (pig)	ssc04720	2	10	Q2PKF4;E3UV40	0.156702	1552	111	0.419408	http://www.genome.jp/kegg-bin/show_pathway?map=ssc04720&multi_query=ssc:654405+red,green%0d%0assc:100153927+red,green%0d%0a
Cushing syndrome - Sus scrofa (pig)	ssc04934	2	10	Q2PKF4;E3UV40	0.156702	1552	111	0.419408	http://www.genome.jp/kegg-bin/show_pathway?map=ssc04934&multi_query=ssc:654405+red,green%0d%0assc:100153927+red,green%0d%0a
Dilated cardiomyopathy - Sus scrofa (pig)	ssc05414	4	30	A0A8D1Z4C9;A0A4X1SK20;A0A8D1KXA4;A0A0B8RTY2	0.161975	1552	111	0.427086	http://www.genome.jp/kegg-bin/show_pathway?map=ssc05414&multi_query=ssc:414396+red,green%0d%0assc:397285+red,green%0d%0assc:397019+red,green%0d%0assc:100511507+red,green%0d%0a
Tight junction - Sus scrofa (pig)	ssc04530	5	41	B5APV0;I3LVS7;K9IVP5;A0A8D1KXA4;A0A0B8RTY2	0.164264	1552	111	0.427086	http://www.genome.jp/kegg-bin/show_pathway?map=ssc04530&multi_query=ssc:396904+red,green%0d%0assc:414396+red,green%0d%0assc:396849+red,green%0d%0assc:100174965+red,green%0d%0assc:397019+red,green%0d%0a
Thyroid hormone signaling pathway - Sus scrofa (pig)	ssc04919	3	20	A0A8D1Z4C9;A0A0B8RTY2;E3UV40	0.167444	1552	111	0.429223	http://www.genome.jp/kegg-bin/show_pathway?map=ssc04919&multi_query=ssc:414396+red,green%0d%0assc:397285+red,green%0d%0assc:100153927+red,green%0d%0a
Renal cell carcinoma - Sus scrofa (pig)	ssc05211	2	11	E3UV40;F1RKX9	0.182971	1552	111	0.448712	http://www.genome.jp/kegg-bin/show_pathway?map=ssc05211&multi_query=ssc:100525363+red,green%0d%0assc:100153927+red,green%0d%0a
GnRH signaling pathway - Sus scrofa (pig)	ssc04912	2	11	Q2PKF4;E3UV40	0.182971	1552	111	0.448712	http://www.genome.jp/kegg-bin/show_pathway?map=ssc04912&multi_query=ssc:654405+red,green%0d%0assc:100153927+red,green%0d%0a
cGMP-PKG signaling pathway - Sus scrofa (pig)	ssc04022	3	21	I3LVS7;Q2PKF4;E3UV40	0.185761	1552	111	0.448712	http://www.genome.jp/kegg-bin/show_pathway?map=ssc04022&multi_query=ssc:396849+red,green%0d%0assc:654405+red,green%0d%0assc:100153927+red,green%0d%0a
PD-L1 expression and PD-1 checkpoint pathway in cancer - Sus scrofa (pig)	ssc05235	1	3	E3UV40	0.199701	1552	111	0.448712	http://www.genome.jp/kegg-bin/show_pathway?map=ssc05235&multi_query=ssc:100153927+red,green%0d%0a
Th1 and Th2 cell differentiation - Sus scrofa (pig)	ssc04658	1	3	E3UV40	0.199701	1552	111	0.448712	http://www.genome.jp/kegg-bin/show_pathway?map=ssc04658&multi_query=ssc:100153927+red,green%0d%0a
Prolactin signaling pathway - Sus scrofa (pig)	ssc04917	1	3	E3UV40	0.199701	1552	111	0.448712	http://www.genome.jp/kegg-bin/show_pathway?map=ssc04917&multi_query=ssc:100153927+red,green%0d%0a
Glycosaminoglycan biosynthesis - heparan sulfate / heparin - Sus scrofa (pig)	ssc00534	1	3	A0A8D1G707	0.199701	1552	111	0.448712	http://www.genome.jp/kegg-bin/show_pathway?map=ssc00534&multi_query=ssc:100514160+red,green%0d%0a
Signaling pathways regulating pluripotency of stem cells - Sus scrofa (pig)	ssc04550	1	3	E3UV40	0.199701	1552	111	0.448712	http://www.genome.jp/kegg-bin/show_pathway?map=ssc04550&multi_query=ssc:100153927+red,green%0d%0a
Cortisol synthesis and secretion - Sus scrofa (pig)	ssc04927	1	3	Q2PKF4	0.199701	1552	111	0.448712	http://www.genome.jp/kegg-bin/show_pathway?map=ssc04927&multi_query=ssc:654405+red,green%0d%0a
Non-small cell lung cancer - Sus scrofa (pig)	ssc05223	1	3	E3UV40	0.199701	1552	111	0.448712	http://www.genome.jp/kegg-bin/show_pathway?map=ssc05223&multi_query=ssc:100153927+red,green%0d%0a
Pancreatic secretion - Sus scrofa (pig)	ssc04972	2	12	I3LVS7;Q2PKF4	0.209822	1552	111	0.449266	http://www.genome.jp/kegg-bin/show_pathway?map=ssc04972&multi_query=ssc:654405+red,green%0d%0assc:396849+red,green%0d%0a
Serotonergic synapse - Sus scrofa (pig)	ssc04726	2	12	Q2PKF4;E3UV40	0.209822	1552	111	0.449266	http://www.genome.jp/kegg-bin/show_pathway?map=ssc04726&multi_query=ssc:654405+red,green%0d%0assc:100153927+red,green%0d%0a
Glutamatergic synapse - Sus scrofa (pig)	ssc04724	2	12	Q2PKF4;E3UV40	0.209822	1552	111	0.449266	http://www.genome.jp/kegg-bin/show_pathway?map=ssc04724&multi_query=ssc:654405+red,green%0d%0assc:100153927+red,green%0d%0a
Cholinergic synapse - Sus scrofa (pig)	ssc04725	2	12	Q2PKF4;E3UV40	0.209822	1552	111	0.449266	http://www.genome.jp/kegg-bin/show_pathway?map=ssc04725&multi_query=ssc:654405+red,green%0d%0assc:100153927+red,green%0d%0a
Circadian entrainment - Sus scrofa (pig)	ssc04713	2	13	Q2PKF4;E3UV40	0.237041	1552	111	0.484737	http://www.genome.jp/kegg-bin/show_pathway?map=ssc04713&multi_query=ssc:654405+red,green%0d%0assc:100153927+red,green%0d%0a
NF-kappa B signaling pathway - Sus scrofa (pig)	ssc04064	2	13	A0A8D0MVS1;A0A8D1VAJ7	0.237041	1552	111	0.484737	http://www.genome.jp/kegg-bin/show_pathway?map=ssc04064&multi_query=ssc:494464+red,green%0d%0assc:494460+red,green%0d%0a
mTOR signaling pathway - Sus scrofa (pig)	ssc04150	2	13	I3LVS7;E3UV40	0.237041	1552	111	0.484737	http://www.genome.jp/kegg-bin/show_pathway?map=ssc04150&multi_query=ssc:396849+red,green%0d%0assc:100153927+red,green%0d%0a
Chagas disease - Sus scrofa (pig)	ssc05142	2	13	Q2PKF4;E3UV40	0.237041	1552	111	0.484737	http://www.genome.jp/kegg-bin/show_pathway?map=ssc05142&multi_query=ssc:654405+red,green%0d%0assc:100153927+red,green%0d%0a
Toll-like receptor signaling pathway - Sus scrofa (pig)	ssc04620	1	4	E3UV40	0.25705	1552	111	0.517508	http://www.genome.jp/kegg-bin/show_pathway?map=ssc04620&multi_query=ssc:100153927+red,green%0d%0a
Retrograde endocannabinoid signaling - Sus scrofa (pig)	ssc04723	2	14	Q2PKF4;E3UV40	0.264441	1552	111	0.517508	http://www.genome.jp/kegg-bin/show_pathway?map=ssc04723&multi_query=ssc:654405+red,green%0d%0assc:100153927+red,green%0d%0a
Gastric acid secretion - Sus scrofa (pig)	ssc04971	2	14	Q2PKF4;A0A0B8RTY2	0.264441	1552	111	0.517508	http://www.genome.jp/kegg-bin/show_pathway?map=ssc04971&multi_query=ssc:654405+red,green%0d%0assc:414396+red,green%0d%0a
Relaxin signaling pathway - Sus scrofa (pig)	ssc04926	2	14	A0A8X9AEL6;E3UV40	0.264441	1552	111	0.517508	http://www.genome.jp/kegg-bin/show_pathway?map=ssc04926&multi_query=ssc:100153927+red,green%0d%0assc:100626716+red,green%0d%0a
Protein digestion and absorption - Sus scrofa (pig)	ssc04974	3	26	F1SN69;A0A8D0WGK8;A0A8X9AEL6	0.283299	1552	111	0.548515	http://www.genome.jp/kegg-bin/show_pathway?map=ssc04974&multi_query=ssc:102159686+red,green%0d%0assc:397323+red,green%0d%0assc:100626716+red,green%0d%0a
Gap junction - Sus scrofa (pig)	ssc04540	2	15	Q2PKF4;E3UV40	0.291856	1552	111	0.553311	http://www.genome.jp/kegg-bin/show_pathway?map=ssc04540&multi_query=ssc:654405+red,green%0d%0assc:100153927+red,green%0d%0a
Hepatocellular carcinoma - Sus scrofa (pig)	ssc05225	2	15	A0A0B8RTY2;E3UV40	0.291856	1552	111	0.553311	http://www.genome.jp/kegg-bin/show_pathway?map=ssc05225&multi_query=ssc:414396+red,green%0d%0assc:100153927+red,green%0d%0a
Aldosterone-regulated sodium reabsorption - Sus scrofa (pig)	ssc04960	1	5	E3UV40	0.310324	1552	111	0.569458	http://www.genome.jp/kegg-bin/show_pathway?map=ssc04960&multi_query=ssc:100153927+red,green%0d%0a
Type II diabetes mellitus - Sus scrofa (pig)	ssc04930	1	5	E3UV40	0.310324	1552	111	0.569458	http://www.genome.jp/kegg-bin/show_pathway?map=ssc04930&multi_query=ssc:100153927+red,green%0d%0a
Glioma - Sus scrofa (pig)	ssc05214	1	5	E3UV40	0.310324	1552	111	0.569458	http://www.genome.jp/kegg-bin/show_pathway?map=ssc05214&multi_query=ssc:100153927+red,green%0d%0a
Influenza A - Sus scrofa (pig)	ssc05164	2	16	A0A0B8RTY2;E3UV40	0.319147	1552	111	0.569458	http://www.genome.jp/kegg-bin/show_pathway?map=ssc05164&multi_query=ssc:414396+red,green%0d%0assc:100153927+red,green%0d%0a
Phospholipase D signaling pathway - Sus scrofa (pig)	ssc04072	2	16	I3LVS7;E3UV40	0.319147	1552	111	0.569458	http://www.genome.jp/kegg-bin/show_pathway?map=ssc04072&multi_query=ssc:396849+red,green%0d%0assc:100153927+red,green%0d%0a
Leishmaniasis - Sus scrofa (pig)	ssc05140	2	16	A0A8D1KXA4;E3UV40	0.319147	1552	111	0.569458	http://www.genome.jp/kegg-bin/show_pathway?map=ssc05140&multi_query=ssc:397019+red,green%0d%0assc:100153927+red,green%0d%0a
Lipid and atherosclerosis - Sus scrofa (pig)	ssc05417	3	29	A0A286ZKC5;I3LVS7;E3UV40	0.344008	1552	111	0.57644	http://www.genome.jp/kegg-bin/show_pathway?map=ssc05417&multi_query=ssc:396849+red,green%0d%0assc:396742+red,green%0d%0assc:100153927+red,green%0d%0a
Chemical carcinogenesis - receptor activation - Sus scrofa (pig)	ssc05207	2	17	A0A286ZKC5;E3UV40	0.346191	1552	111	0.57644	http://www.genome.jp/kegg-bin/show_pathway?map=ssc05207&multi_query=ssc:396742+red,green%0d%0assc:100153927+red,green%0d%0a
cAMP signaling pathway - Sus scrofa (pig)	ssc04024	2	17	I3LVS7;E3UV40	0.346191	1552	111	0.57644	http://www.genome.jp/kegg-bin/show_pathway?map=ssc04024&multi_query=ssc:396849+red,green%0d%0assc:100153927+red,green%0d%0a
Apoptosis - Sus scrofa (pig)	ssc04210	2	17	A0A0B8RTY2;E3UV40	0.346191	1552	111	0.57644	http://www.genome.jp/kegg-bin/show_pathway?map=ssc04210&multi_query=ssc:414396+red,green%0d%0assc:100153927+red,green%0d%0a
Insulin signaling pathway - Sus scrofa (pig)	ssc04910	2	17	E3UV40;F1RKX9	0.346191	1552	111	0.57644	http://www.genome.jp/kegg-bin/show_pathway?map=ssc04910&multi_query=ssc:100153927+red,green%0d%0assc:100525363+red,green%0d%0a
Glycosaminoglycan degradation - Sus scrofa (pig)	ssc00531	1	6	A0A8D0MS68	0.359809	1552	111	0.57644	http://www.genome.jp/kegg-bin/show_pathway?map=ssc00531&multi_query=ssc:100623722+red,green%0d%0a
Phenylalanine metabolism - Sus scrofa (pig)	ssc00360	1	6	D0G778	0.359809	1552	111	0.57644	http://www.genome.jp/kegg-bin/show_pathway?map=ssc00360&multi_query=ssc:397412+red,green%0d%0a
FoxO signaling pathway - Sus scrofa (pig)	ssc04068	1	6	E3UV40	0.359809	1552	111	0.57644	http://www.genome.jp/kegg-bin/show_pathway?map=ssc04068&multi_query=ssc:100153927+red,green%0d%0a
Pancreatic cancer - Sus scrofa (pig)	ssc05212	1	6	E3UV40	0.359809	1552	111	0.57644	http://www.genome.jp/kegg-bin/show_pathway?map=ssc05212&multi_query=ssc:100153927+red,green%0d%0a
TNF signaling pathway - Sus scrofa (pig)	ssc04668	1	6	E3UV40	0.359809	1552	111	0.57644	http://www.genome.jp/kegg-bin/show_pathway?map=ssc04668&multi_query=ssc:100153927+red,green%0d%0a
EGFR tyrosine kinase inhibitor resistance - Sus scrofa (pig)	ssc01521	1	6	E3UV40	0.359809	1552	111	0.57644	http://www.genome.jp/kegg-bin/show_pathway?map=ssc01521&multi_query=ssc:100153927+red,green%0d%0a
Human immunodeficiency virus 1 infection - Sus scrofa (pig)	ssc05170	3	30	Q2PKF4;E3UV40;F1RKX9	0.364234	1552	111	0.57644	http://www.genome.jp/kegg-bin/show_pathway?map=ssc05170&multi_query=ssc:100525363+red,green%0d%0assc:654405+red,green%0d%0assc:100153927+red,green%0d%0a
Fc gamma R-mediated phagocytosis - Sus scrofa (pig)	ssc04666	3	30	B5APV0;E3UV40;F1RKX9	0.364234	1552	111	0.57644	http://www.genome.jp/kegg-bin/show_pathway?map=ssc04666&multi_query=ssc:100525363+red,green%0d%0assc:100174965+red,green%0d%0assc:100153927+red,green%0d%0a
Tuberculosis - Sus scrofa (pig)	ssc05152	3	31	Q06AU6;I3LVS7;E3UV40	0.384367	1552	111	0.600413	http://www.genome.jp/kegg-bin/show_pathway?map=ssc05152&multi_query=ssc:396849+red,green%0d%0assc:100153927+red,green%0d%0assc:100144499+red,green%0d%0a
African trypanosomiasis - Sus scrofa (pig)	ssc05143	2	19	Q2PKF4;A0A4X1V4N3	0.399142	1552	111	0.600413	http://www.genome.jp/kegg-bin/show_pathway?map=ssc05143&multi_query=ssc:654405+red,green%0d%0assc:100154581+red,green%0d%0a
Endocrine resistance - Sus scrofa (pig)	ssc01522	1	7	E3UV40	0.405774	1552	111	0.600413	http://www.genome.jp/kegg-bin/show_pathway?map=ssc01522&multi_query=ssc:100153927+red,green%0d%0a
Renin secretion - Sus scrofa (pig)	ssc04924	1	7	Q2PKF4	0.405774	1552	111	0.600413	http://www.genome.jp/kegg-bin/show_pathway?map=ssc04924&multi_query=ssc:654405+red,green%0d%0a
Inflammatory mediator regulation of TRP channels - Sus scrofa (pig)	ssc04750	1	7	Q2PKF4	0.405774	1552	111	0.600413	http://www.genome.jp/kegg-bin/show_pathway?map=ssc04750&multi_query=ssc:654405+red,green%0d%0a
Choline metabolism in cancer - Sus scrofa (pig)	ssc05231	1	7	E3UV40	0.405774	1552	111	0.600413	http://www.genome.jp/kegg-bin/show_pathway?map=ssc05231&multi_query=ssc:100153927+red,green%0d%0a
Insulin secretion - Sus scrofa (pig)	ssc04911	1	7	Q2PKF4	0.405774	1552	111	0.600413	http://www.genome.jp/kegg-bin/show_pathway?map=ssc04911&multi_query=ssc:654405+red,green%0d%0a
Osteoclast differentiation - Sus scrofa (pig)	ssc04380	1	7	E3UV40	0.405774	1552	111	0.600413	http://www.genome.jp/kegg-bin/show_pathway?map=ssc04380&multi_query=ssc:100153927+red,green%0d%0a
MAPK signaling pathway - Sus scrofa (pig)	ssc04010	2	21	E3UV40;F1RKX9	0.450057	1552	111	0.660567	http://www.genome.jp/kegg-bin/show_pathway?map=ssc04010&multi_query=ssc:100525363+red,green%0d%0assc:100153927+red,green%0d%0a
Human T-cell leukemia virus 1 infection - Sus scrofa (pig)	ssc05166	2	22	A0A8D0MJU2;E3UV40	0.474605	1552	111	0.683362	http://www.genome.jp/kegg-bin/show_pathway?map=ssc05166&multi_query=ssc:100157220+red,green%0d%0assc:100153927+red,green%0d%0a
Aldosterone synthesis and secretion - Sus scrofa (pig)	ssc04925	1	9	Q2PKF4	0.488116	1552	111	0.683362	http://www.genome.jp/kegg-bin/show_pathway?map=ssc04925&multi_query=ssc:654405+red,green%0d%0a
Platinum drug resistance - Sus scrofa (pig)	ssc01524	1	9	E3UV40	0.488116	1552	111	0.683362	http://www.genome.jp/kegg-bin/show_pathway?map=ssc01524&multi_query=ssc:100153927+red,green%0d%0a
VEGF signaling pathway - Sus scrofa (pig)	ssc04370	1	9	E3UV40	0.488116	1552	111	0.683362	http://www.genome.jp/kegg-bin/show_pathway?map=ssc04370&multi_query=ssc:100153927+red,green%0d%0a
Measles - Sus scrofa (pig)	ssc05162	1	9	P63246	0.488116	1552	111	0.683362	http://www.genome.jp/kegg-bin/show_pathway?map=ssc05162&multi_query=ssc:397605+red,green%0d%0a
PPAR signaling pathway - Sus scrofa (pig)	ssc03320	1	9	A0A8W4F681	0.488116	1552	111	0.683362	http://www.genome.jp/kegg-bin/show_pathway?map=ssc03320&multi_query=ssc:100623256+red,green%0d%0a
Adrenergic signaling in cardiomyocytes - Sus scrofa (pig)	ssc04261	2	24	Q2PKF4;E3UV40	0.52168	1552	111	0.712978	http://www.genome.jp/kegg-bin/show_pathway?map=ssc04261&multi_query=ssc:654405+red,green%0d%0assc:100153927+red,green%0d%0a
Ascorbate and aldarate metabolism - Sus scrofa (pig)	ssc00053	1	10	I3LIM2	0.52494	1552	111	0.712978	http://www.genome.jp/kegg-bin/show_pathway?map=ssc00053&multi_query=ssc:100627727+red,green%0d%0a
Vasopressin-regulated water reabsorption - Sus scrofa (pig)	ssc04962	1	10	Q06AU6	0.52494	1552	111	0.712978	http://www.genome.jp/kegg-bin/show_pathway?map=ssc04962&multi_query=ssc:100144499+red,green%0d%0a
Tyrosine metabolism - Sus scrofa (pig)	ssc00350	1	10	D0G778	0.52494	1552	111	0.712978	http://www.genome.jp/kegg-bin/show_pathway?map=ssc00350&multi_query=ssc:397412+red,green%0d%0a
Autophagy - animal - Sus scrofa (pig)	ssc04140	1	11	E3UV40	0.559137	1552	111	0.748257	http://www.genome.jp/kegg-bin/show_pathway?map=ssc04140&multi_query=ssc:100153927+red,green%0d%0a
Pentose and glucuronate interconversions - Sus scrofa (pig)	ssc00040	1	11	I3LIM2	0.559137	1552	111	0.748257	http://www.genome.jp/kegg-bin/show_pathway?map=ssc00040&multi_query=ssc:100627727+red,green%0d%0a
Intestinal immune network for IgA production - Sus scrofa (pig)	ssc04672	1	12	A0A8D1VAJ7	0.590893	1552	111	0.779293	http://www.genome.jp/kegg-bin/show_pathway?map=ssc04672&multi_query=ssc:494460+red,green%0d%0a
Cholesterol metabolism - Sus scrofa (pig)	ssc04979	1	12	F1RM45	0.590893	1552	111	0.779293	http://www.genome.jp/kegg-bin/show_pathway?map=ssc04979&multi_query=ssc:397576+red,green%0d%0a
Salivary secretion - Sus scrofa (pig)	ssc04970	1	13	Q2PKF4	0.62038	1552	111	0.812296	http://www.genome.jp/kegg-bin/show_pathway?map=ssc04970&multi_query=ssc:654405+red,green%0d%0a
Endocrine and other factor-regulated calcium reabsorption - Sus scrofa (pig)	ssc04961	1	14	Q2PKF4	0.64776	1552	111	0.836116	http://www.genome.jp/kegg-bin/show_pathway?map=ssc04961&multi_query=ssc:654405+red,green%0d%0a
Fc epsilon RI signaling pathway - Sus scrofa (pig)	ssc04664	1	14	E3UV40	0.64776	1552	111	0.836116	http://www.genome.jp/kegg-bin/show_pathway?map=ssc04664&multi_query=ssc:100153927+red,green%0d%0a
Natural killer cell mediated cytotoxicity - Sus scrofa (pig)	ssc04650	1	15	E3UV40	0.673182	1552	111	0.850827	http://www.genome.jp/kegg-bin/show_pathway?map=ssc04650&multi_query=ssc:100153927+red,green%0d%0a
Thyroid hormone synthesis - Sus scrofa (pig)	ssc04918	1	15	Q2PKF4	0.673182	1552	111	0.850827	http://www.genome.jp/kegg-bin/show_pathway?map=ssc04918&multi_query=ssc:654405+red,green%0d%0a
B cell receptor signaling pathway - Sus scrofa (pig)	ssc04662	1	15	E3UV40	0.673182	1552	111	0.850827	http://www.genome.jp/kegg-bin/show_pathway?map=ssc04662&multi_query=ssc:100153927+red,green%0d%0a
Kaposi sarcoma-associated herpesvirus infection - Sus scrofa (pig)	ssc05167	1	16	E3UV40	0.696784	1552	111	0.856857	http://www.genome.jp/kegg-bin/show_pathway?map=ssc05167&multi_query=ssc:100153927+red,green%0d%0a
Complement and coagulation cascades - Sus scrofa (pig)	ssc04610	1	16	A0A8D1MCD3	0.696784	1552	111	0.856857	http://www.genome.jp/kegg-bin/show_pathway?map=ssc04610&multi_query=ssc:397025+red,green%0d%0a
Hepatitis C - Sus scrofa (pig)	ssc05160	1	16	E3UV40	0.696784	1552	111	0.856857	http://www.genome.jp/kegg-bin/show_pathway?map=ssc05160&multi_query=ssc:100153927+red,green%0d%0a
Cellular senescence - Sus scrofa (pig)	ssc04218	1	16	E3UV40	0.696784	1552	111	0.856857	http://www.genome.jp/kegg-bin/show_pathway?map=ssc04218&multi_query=ssc:100153927+red,green%0d%0a
Motor proteins - Sus scrofa (pig)	ssc04814	2	34	K9IVP5;A0A0B8RTY2	0.713004	1552	111	0.860544	http://www.genome.jp/kegg-bin/show_pathway?map=ssc04814&multi_query=ssc:396904+red,green%0d%0assc:414396+red,green%0d%0a
Rheumatoid arthritis - Sus scrofa (pig)	ssc05323	1	17	A0A8D1VAJ7	0.718696	1552	111	0.860544	http://www.genome.jp/kegg-bin/show_pathway?map=ssc05323&multi_query=ssc:494460+red,green%0d%0a
Oocyte meiosis - Sus scrofa (pig)	ssc04114	1	17	E3UV40	0.718696	1552	111	0.860544	http://www.genome.jp/kegg-bin/show_pathway?map=ssc04114&multi_query=ssc:100153927+red,green%0d%0a
Antigen processing and presentation - Sus scrofa (pig)	ssc04612	1	17	A0A286ZKC5	0.718696	1552	111	0.860544	http://www.genome.jp/kegg-bin/show_pathway?map=ssc04612&multi_query=ssc:396742+red,green%0d%0a
Viral carcinogenesis - Sus scrofa (pig)	ssc05203	2	35	I3LVS7;E3UV40	0.72815	1552	111	0.866166	http://www.genome.jp/kegg-bin/show_pathway?map=ssc05203&multi_query=ssc:396849+red,green%0d%0assc:100153927+red,green%0d%0a
Viral myocarditis - Sus scrofa (pig)	ssc05416	1	18	A0A0B8RTY2	0.739038	1552	111	0.867558	http://www.genome.jp/kegg-bin/show_pathway?map=ssc05416&multi_query=ssc:414396+red,green%0d%0a
Endocytosis - Sus scrofa (pig)	ssc04144	3	53	Q06AU6;B5APV0;I3LVS7	0.745266	1552	111	0.867558	http://www.genome.jp/kegg-bin/show_pathway?map=ssc04144&multi_query=ssc:396849+red,green%0d%0assc:100174965+red,green%0d%0assc:100144499+red,green%0d%0a
Neutrophil extracellular trap formation - Sus scrofa (pig)	ssc04613	2	37	A0A0B8RTY2;E3UV40	0.756436	1552	111	0.867558	http://www.genome.jp/kegg-bin/show_pathway?map=ssc04613&multi_query=ssc:414396+red,green%0d%0assc:100153927+red,green%0d%0a
Herpes simplex virus 1 infection - Sus scrofa (pig)	ssc05168	1	19	A0A8D0Y7D9	0.757921	1552	111	0.867558	http://www.genome.jp/kegg-bin/show_pathway?map=ssc05168&multi_query=ssc:100739153+red,green%0d%0a
Central carbon metabolism in cancer - Sus scrofa (pig)	ssc05230	1	19	E3UV40	0.757921	1552	111	0.867558	http://www.genome.jp/kegg-bin/show_pathway?map=ssc05230&multi_query=ssc:100153927+red,green%0d%0a
Dopaminergic synapse - Sus scrofa (pig)	ssc04728	1	19	Q2PKF4	0.757921	1552	111	0.867558	http://www.genome.jp/kegg-bin/show_pathway?map=ssc04728&multi_query=ssc:654405+red,green%0d%0a
Ribosome - Sus scrofa (pig)	ssc03010	4	72	I3LEX0;A0A4X1SK65;A0A480QPE7;Q4GWZ2	0.772444	1552	111	0.876595	http://www.genome.jp/kegg-bin/show_pathway?map=ssc03010&multi_query=ssc:100622613+red,green%0d%0assc:414390+red,green%0d%0assc:397650+red,green%0d%0assc:641351+red,green%0d%0a
Biosynthesis of nucleotide sugars - Sus scrofa (pig)	ssc01250	1	20	I3LIM2	0.77545	1552	111	0.876595	http://www.genome.jp/kegg-bin/show_pathway?map=ssc01250&multi_query=ssc:100627727+red,green%0d%0a
Coronavirus disease - COVID-19 - Sus scrofa (pig)	ssc05171	5	92	I3LEX0;A0A4X1SK65;E3UV40;A0A480QPE7;Q4GWZ2	0.803822	1552	111	0.895373	http://www.genome.jp/kegg-bin/show_pathway?map=ssc05171&multi_query=ssc:641351+red,green%0d%0assc:100622613+red,green%0d%0assc:397650+red,green%0d%0assc:100153927+red,green%0d%0assc:414390+red,green%0d%0a
Glucagon signaling pathway - Sus scrofa (pig)	ssc04922	1	22	Q2PKF4	0.80682	1552	111	0.895373	http://www.genome.jp/kegg-bin/show_pathway?map=ssc04922&multi_query=ssc:654405+red,green%0d%0a
Alcoholism - Sus scrofa (pig)	ssc05034	1	22	E3UV40	0.80682	1552	111	0.895373	http://www.genome.jp/kegg-bin/show_pathway?map=ssc05034&multi_query=ssc:100153927+red,green%0d%0a
Thermogenesis - Sus scrofa (pig)	ssc04714	1	25	A0A0B8RTY2	0.845912	1552	111	0.933067	http://www.genome.jp/kegg-bin/show_pathway?map=ssc04714&multi_query=ssc:414396+red,green%0d%0a
Amino sugar and nucleotide sugar metabolism - Sus scrofa (pig)	ssc00520	1	26	I3LIM2	0.857113	1552	111	0.934099	http://www.genome.jp/kegg-bin/show_pathway?map=ssc00520&multi_query=ssc:100627727+red,green%0d%0a
Lysosome - Sus scrofa (pig)	ssc04142	1	26	A0A8D0MS68	0.857113	1552	111	0.934099	http://www.genome.jp/kegg-bin/show_pathway?map=ssc04142&multi_query=ssc:100623722+red,green%0d%0a
Necroptosis - Sus scrofa (pig)	ssc04217	1	27	A0A286ZKC5	0.867506	1552	111	0.939799	http://www.genome.jp/kegg-bin/show_pathway?map=ssc04217&multi_query=ssc:396742+red,green%0d%0a
Calcium signaling pathway - Sus scrofa (pig)	ssc04020	1	28	Q2PKF4	0.87715	1552	111	0.944623	http://www.genome.jp/kegg-bin/show_pathway?map=ssc04020&multi_query=ssc:654405+red,green%0d%0a
HIF-1 signaling pathway - Sus scrofa (pig)	ssc04066	1	29	E3UV40	0.886098	1552	111	0.946621	http://www.genome.jp/kegg-bin/show_pathway?map=ssc04066&multi_query=ssc:100153927+red,green%0d%0a
Amyotrophic lateral sclerosis - Sus scrofa (pig)	ssc05014	4	88	A0A8D0Y7D9;Q06AU6;A0A0B8RTY2;P31346	0.889408	1552	111	0.946621	http://www.genome.jp/kegg-bin/show_pathway?map=ssc05014&multi_query=ssc:414396+red,green%0d%0assc:100739153+red,green%0d%0assc:100144499+red,green%0d%0assc:733639+red,green%0d%0a
Biosynthesis of cofactors - Sus scrofa (pig)	ssc01240	1	31	I3LIM2	0.902101	1552	111	0.954549	http://www.genome.jp/kegg-bin/show_pathway?map=ssc01240&multi_query=ssc:100627727+red,green%0d%0a
Alzheimer disease - Sus scrofa (pig)	ssc05010	3	77	F1RM45;Q2PKF4;E3UV40	0.92499	1552	111	0.97311	http://www.genome.jp/kegg-bin/show_pathway?map=ssc05010&multi_query=ssc:654405+red,green%0d%0assc:397576+red,green%0d%0assc:100153927+red,green%0d%0a
Chemical carcinogenesis - reactive oxygen species - Sus scrofa (pig)	ssc05208	1	38	E3UV40	0.942465	1552	111	0.985796	http://www.genome.jp/kegg-bin/show_pathway?map=ssc05208&multi_query=ssc:100153927+red,green%0d%0a
Diabetic cardiomyopathy - Sus scrofa (pig)	ssc05415	1	40	A0A8X9AEL6	0.950595	1552	111	0.988618	http://www.genome.jp/kegg-bin/show_pathway?map=ssc05415&multi_query=ssc:100626716+red,green%0d%0a
Spinocerebellar ataxia - Sus scrofa (pig)	ssc05017	1	42	Q2PKF4	0.957584	1552	111	0.990229	http://www.genome.jp/kegg-bin/show_pathway?map=ssc05017&multi_query=ssc:654405+red,green%0d%0a
Spliceosome - Sus scrofa (pig)	ssc03040	1	44	A0A8D0Y7D9	0.963593	1552	111	0.990813	http://www.genome.jp/kegg-bin/show_pathway?map=ssc03040&multi_query=ssc:100739153+red,green%0d%0a
Pathways of neurodegeneration - multiple diseases - Sus scrofa (pig)	ssc05022	3	94	Q06AU6;Q2PKF4;E3UV40	0.971617	1552	111	0.993451	http://www.genome.jp/kegg-bin/show_pathway?map=ssc05022&multi_query=ssc:654405+red,green%0d%0assc:100153927+red,green%0d%0assc:100144499+red,green%0d%0a
Prion disease - Sus scrofa (pig)	ssc05020	2	76	A0A8D1PC44;E3UV40	0.977972	1552	111	0.994363	http://www.genome.jp/kegg-bin/show_pathway?map=ssc05020&multi_query=ssc:100153927+red,green%0d%0assc:100514785+red,green%0d%0a
Protein processing in endoplasmic reticulum - Sus scrofa (pig)	ssc04141	1	63	A0A286ZKC5	0.99156	1552	111	1	http://www.genome.jp/kegg-bin/show_pathway?map=ssc04141&multi_query=ssc:396742+red,green%0d%0a
Huntington disease - Sus scrofa (pig)	ssc05016	1	77	Q2PKF4	0.997161	1552	111	1	http://www.genome.jp/kegg-bin/show_pathway?map=ssc05016&multi_query=ssc:654405+red,green%0d%0a
Metabolic pathways - Sus scrofa (pig)	ssc01100	4	276	D0G778;A0A8D1G707;A0A8D0MS68;I3LIM2	1	1552	111	1	http://www.genome.jp/kegg-bin/show_pathway?ssc01100+ssc:100623722+ssc:100627727+ssc:397412+ssc:100514160
